# Supplementary material for: The Lennard-Jones potential: when (not) to use it
Source: Royal Society of Chemistry journal article supplement (doi:10.1039/c9cp05445f), 2019-10-28
Supplement: c9cp05445f1.zip [file c9cp05445f1.zip]

$\beta = \frac{1}{k_b T}$ ,  $k_b$  is Boltzmann Constant,  $T$  is temperature

$a_{exc} = \frac{A_{total}}{V}$ ,  $A_{total}$  is the total free energy of the system,  $V$  is volume

$P_{exc}$  is the excess pressure

$e = \frac{E_{total}}{V}$ ,  $E_{total}$  is the total energy of the system

$\rho$  is number density

For solid, we fit the  $\beta\rho a_{exc}$ ,  $\beta P_{exc}$  and  $\rho e$  together, their polynomials as follow:

$$\beta\rho a_{exc}(\rho, \beta) = \frac{3\rho}{2} \ln(\beta) + \sum_{n_{min}}^{n_{max}} \sum_{m_{min}}^{m_{max}} a_{nm} \rho^n \beta^m$$

$$\beta P_{exc}(\rho, \beta) = \sum_{n_{min}}^{n_{max}} \sum_{m_{min}}^{m_{max}} (n-1) a_{nm} \rho^n \beta^m$$

$$\rho e = \frac{3\rho}{2} \beta^{-1} + \sum_{n_{min}}^{n_{max}} \sum_{m_{min}}^{m_{max}} m a_{nm} \rho^n \beta^{m-1}$$

$a_{nm}$  is the fitting parameter

$$n_{min} = 0, n_{max} = 5, m_{min} = -2, m_{max} = 1$$
