# Supplementary material for: The Lennard-Jones potential: when (not) to use it
Source: Royal Society of Chemistry journal article supplement (doi:10.1039/c9cp05445f), 2019-10-28
Supplement: c9cp05445f1.zip [file c9cp05445f1.zip]

$\beta = \frac{1}{k_b T}$ ,  $k_b$  is Boltzmann Constant,  $T$  is temperature

$P_{exc}$  is the excess pressure

$e = \frac{E_{total}}{V}$ ,  $E_{total}$  is the total energy,  $V$  is volume

$\rho$  is number density

For liquid and fluid, we fit the  $\beta P_{exc}$ ,  $\rho e_{exc}$  together, their polynomials as follow:

$$\beta P_{exc} = \sum_{n=n_{min}}^{n=n_{max}} \sum_{m=m_{min}}^{m=m_{max}} (n-1) a_{nm} \rho^n \beta^m$$

$$\rho e_{exc} = \sum_{n=n_{min}}^{n=n_{max}} \sum_{m=m_{min}}^{m=m_{max}} m a_{nm} \rho^n \beta^{m-1}$$

$$n_{min} = 2, n_{max} = 8, m_{min} = -3, m_{max} = 2$$
