# Supplementary material for: The Lennard-Jones potential: when (not) to use it
Source: Royal Society of Chemistry journal article supplement (doi:10.1039/c9cp05445f), 2019-10-28
Supplement: c9cp05445f1.zip [file c9cp05445f1.zip]

$\beta = \frac{1}{k_b T}$ ,  $k_b$  is Boltzmann Constant, T is temperature

$\rho$  is number density

$\kappa$  is thermal conductivity

We fit  $\kappa$  with the following polynomial:

$$\kappa = \sum_{n_{min}}^{n_{max}} \sum_{m_{min}}^{m_{max}} a_{nm} \rho^n \beta^m$$

$a_{nm}$  is the fitting parameter

$$n_{min} = 0, n_{max} = 6, m_{min} = 0, m_{max} = 6$$
