# Supplementary material for: The Lennard-Jones potential: when (not) to use it
Source: Royal Society of Chemistry journal article supplement (doi:10.1039/c9cp05445f), 2019-10-28
Supplement: c9cp05445f2.zip [file c9cp05445f2.zip]

$\beta = \frac{1}{k_b T}$ ,  $k_b$  is Boltzmann Constant, T is temperature

$\rho$  is number density

D is diffusion coefficient

We fit  $\rho D$  with the following polynomial:

$$\rho D = \sum_{n=n_{min}}^{n=n_{max}} \sum_{m=m_{min}}^{m=m_{max}} a_{nm} \rho^n \beta^m$$

$a_{nm}$  is the fitting parameter

$$n_{min} = 0, n_{max} = 2, m_{min} = -2, m_{max} = 0$$
