# Supplementary figures and images for: The Lennard-Jones potential: when (not) to use it
Source: Royal Society of Chemistry journal article supplement (doi:10.1039/c9cp05445f), 2019-10-28

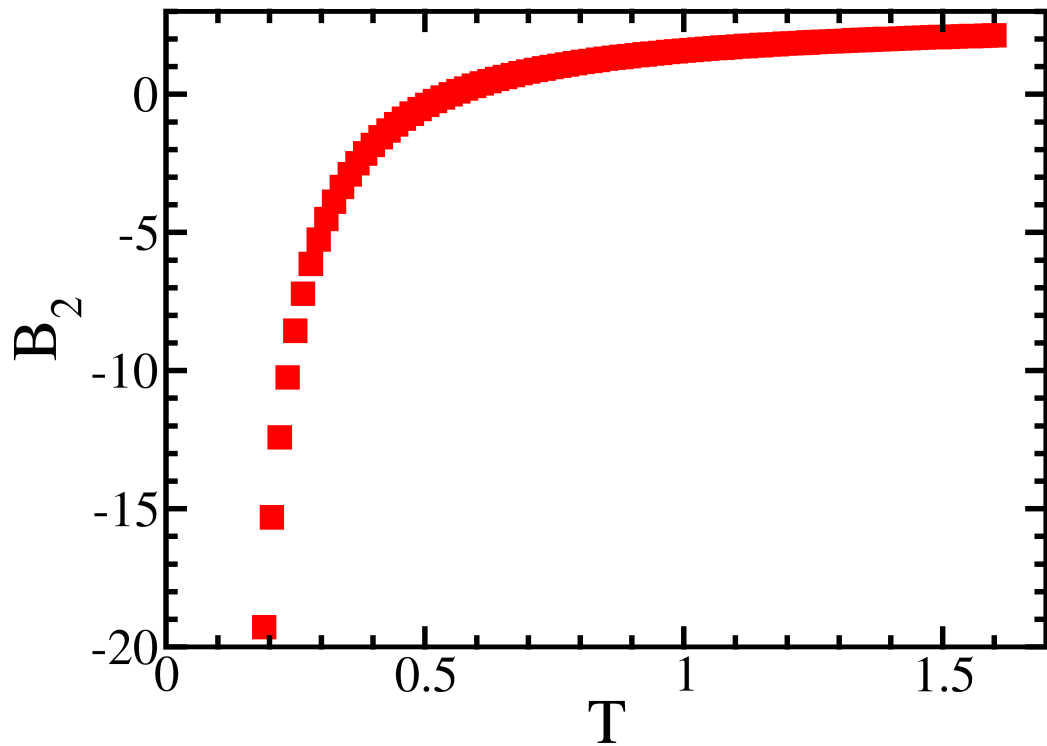

Supplement: c9cp05445f1.zip [file c9cp05445f1.zip]

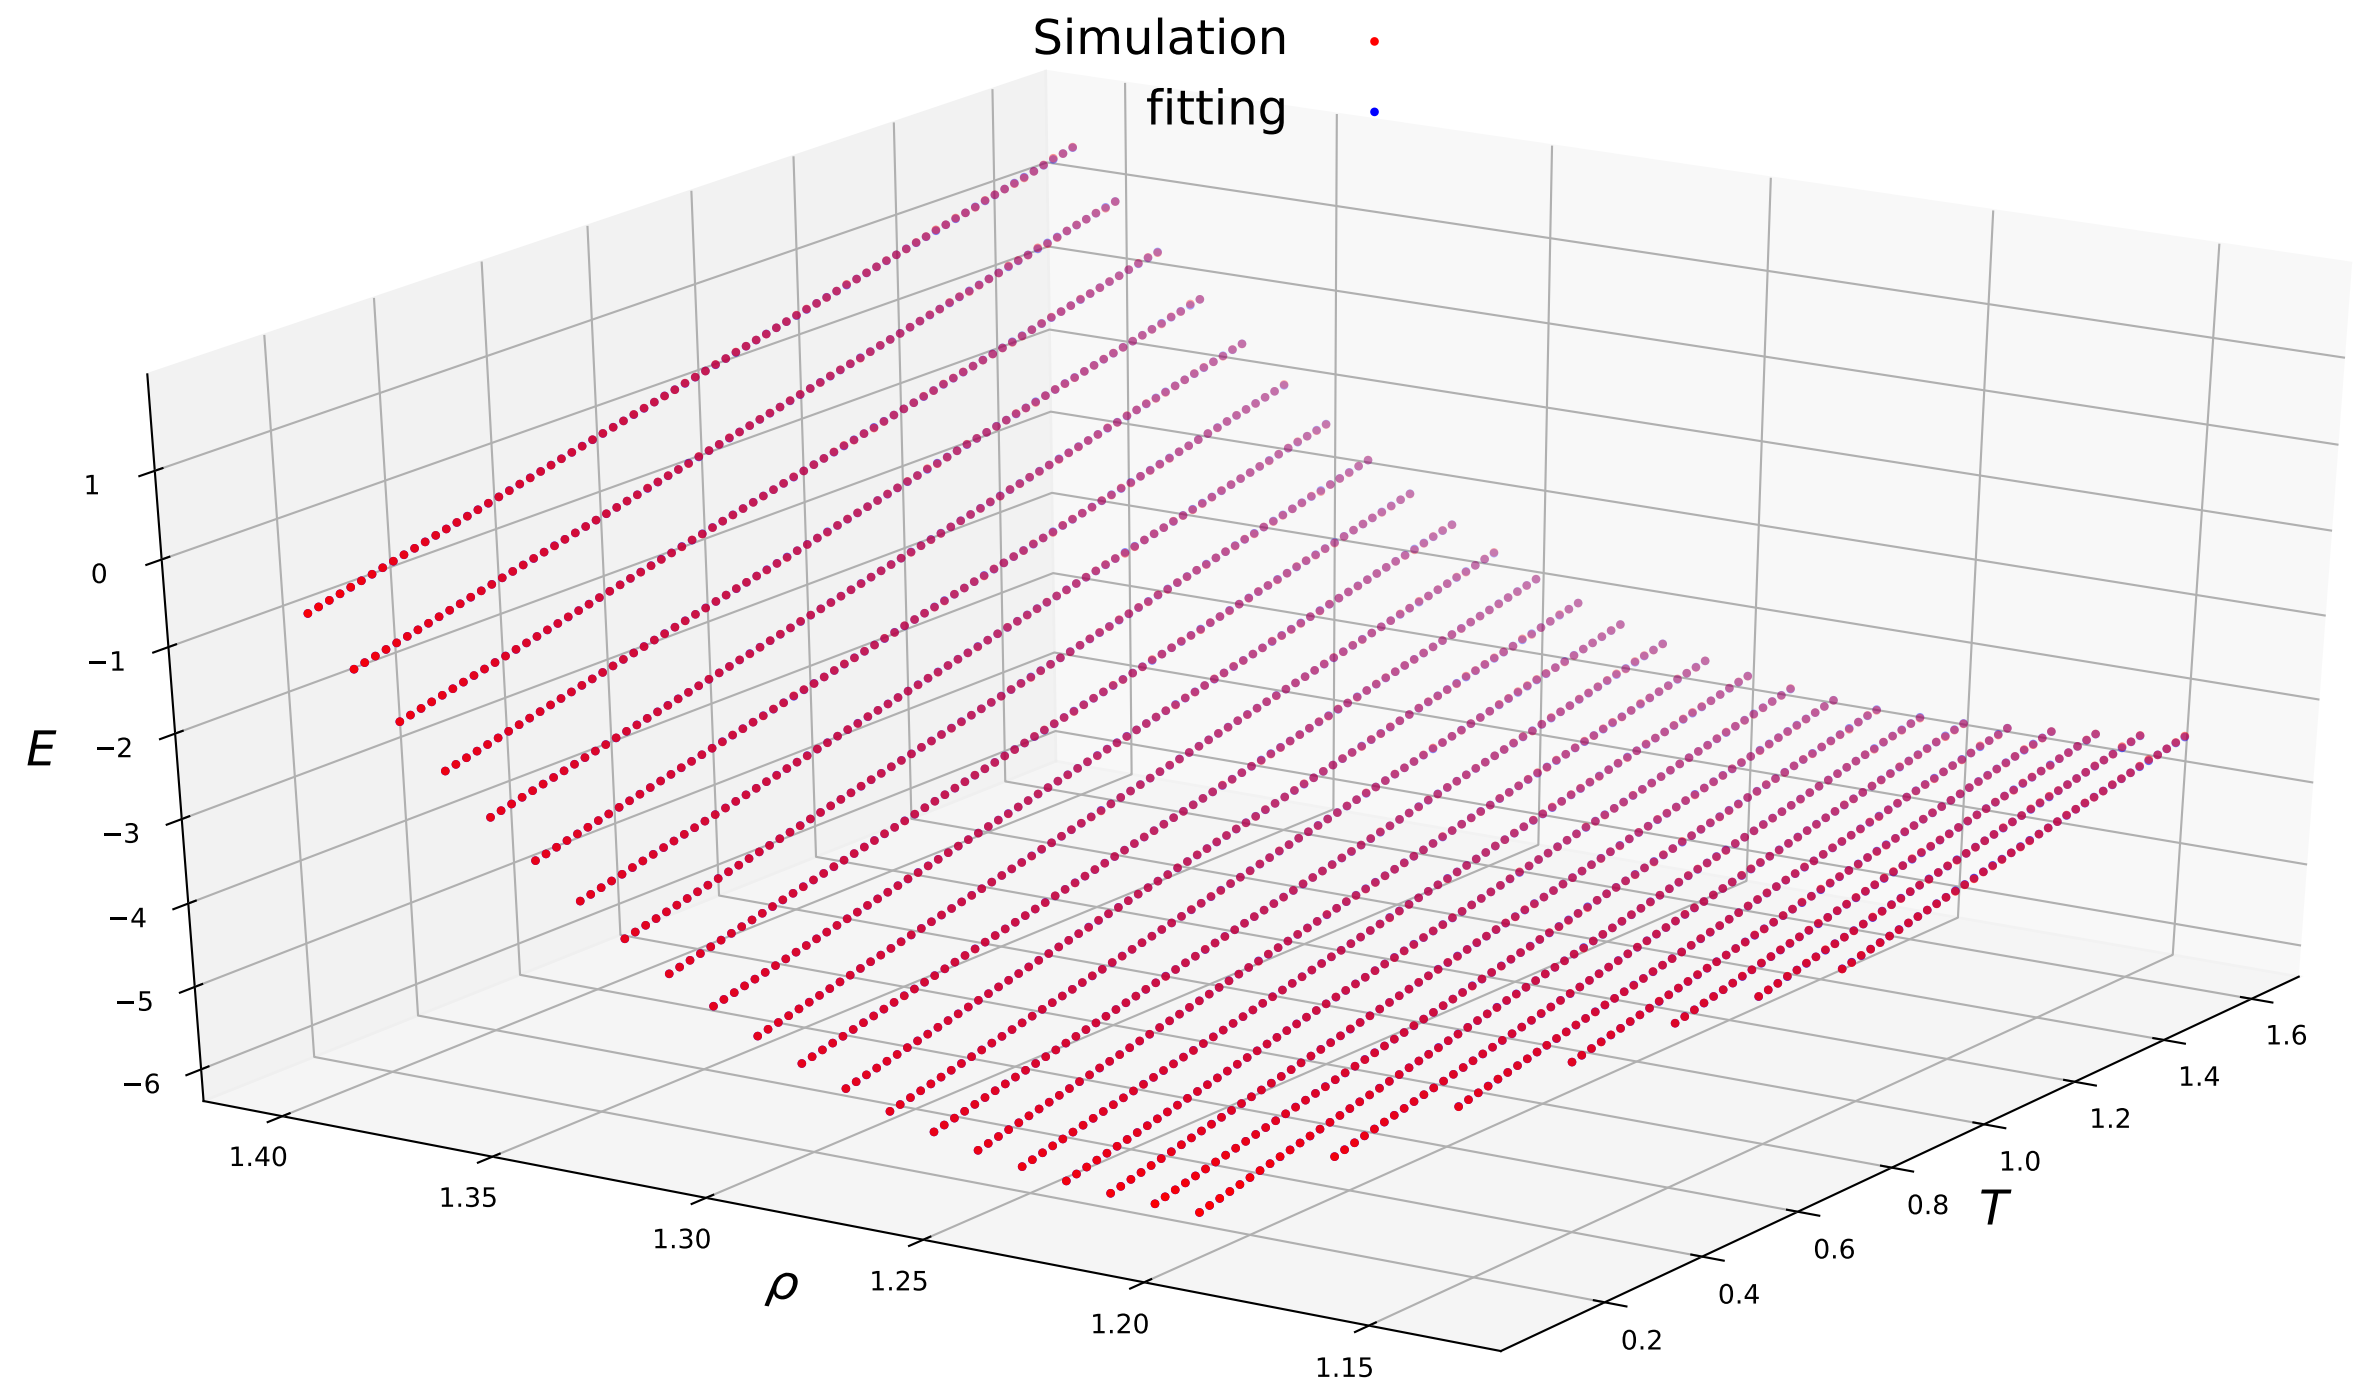

Supplement: c9cp05445f1.zip [file c9cp05445f1.zip]

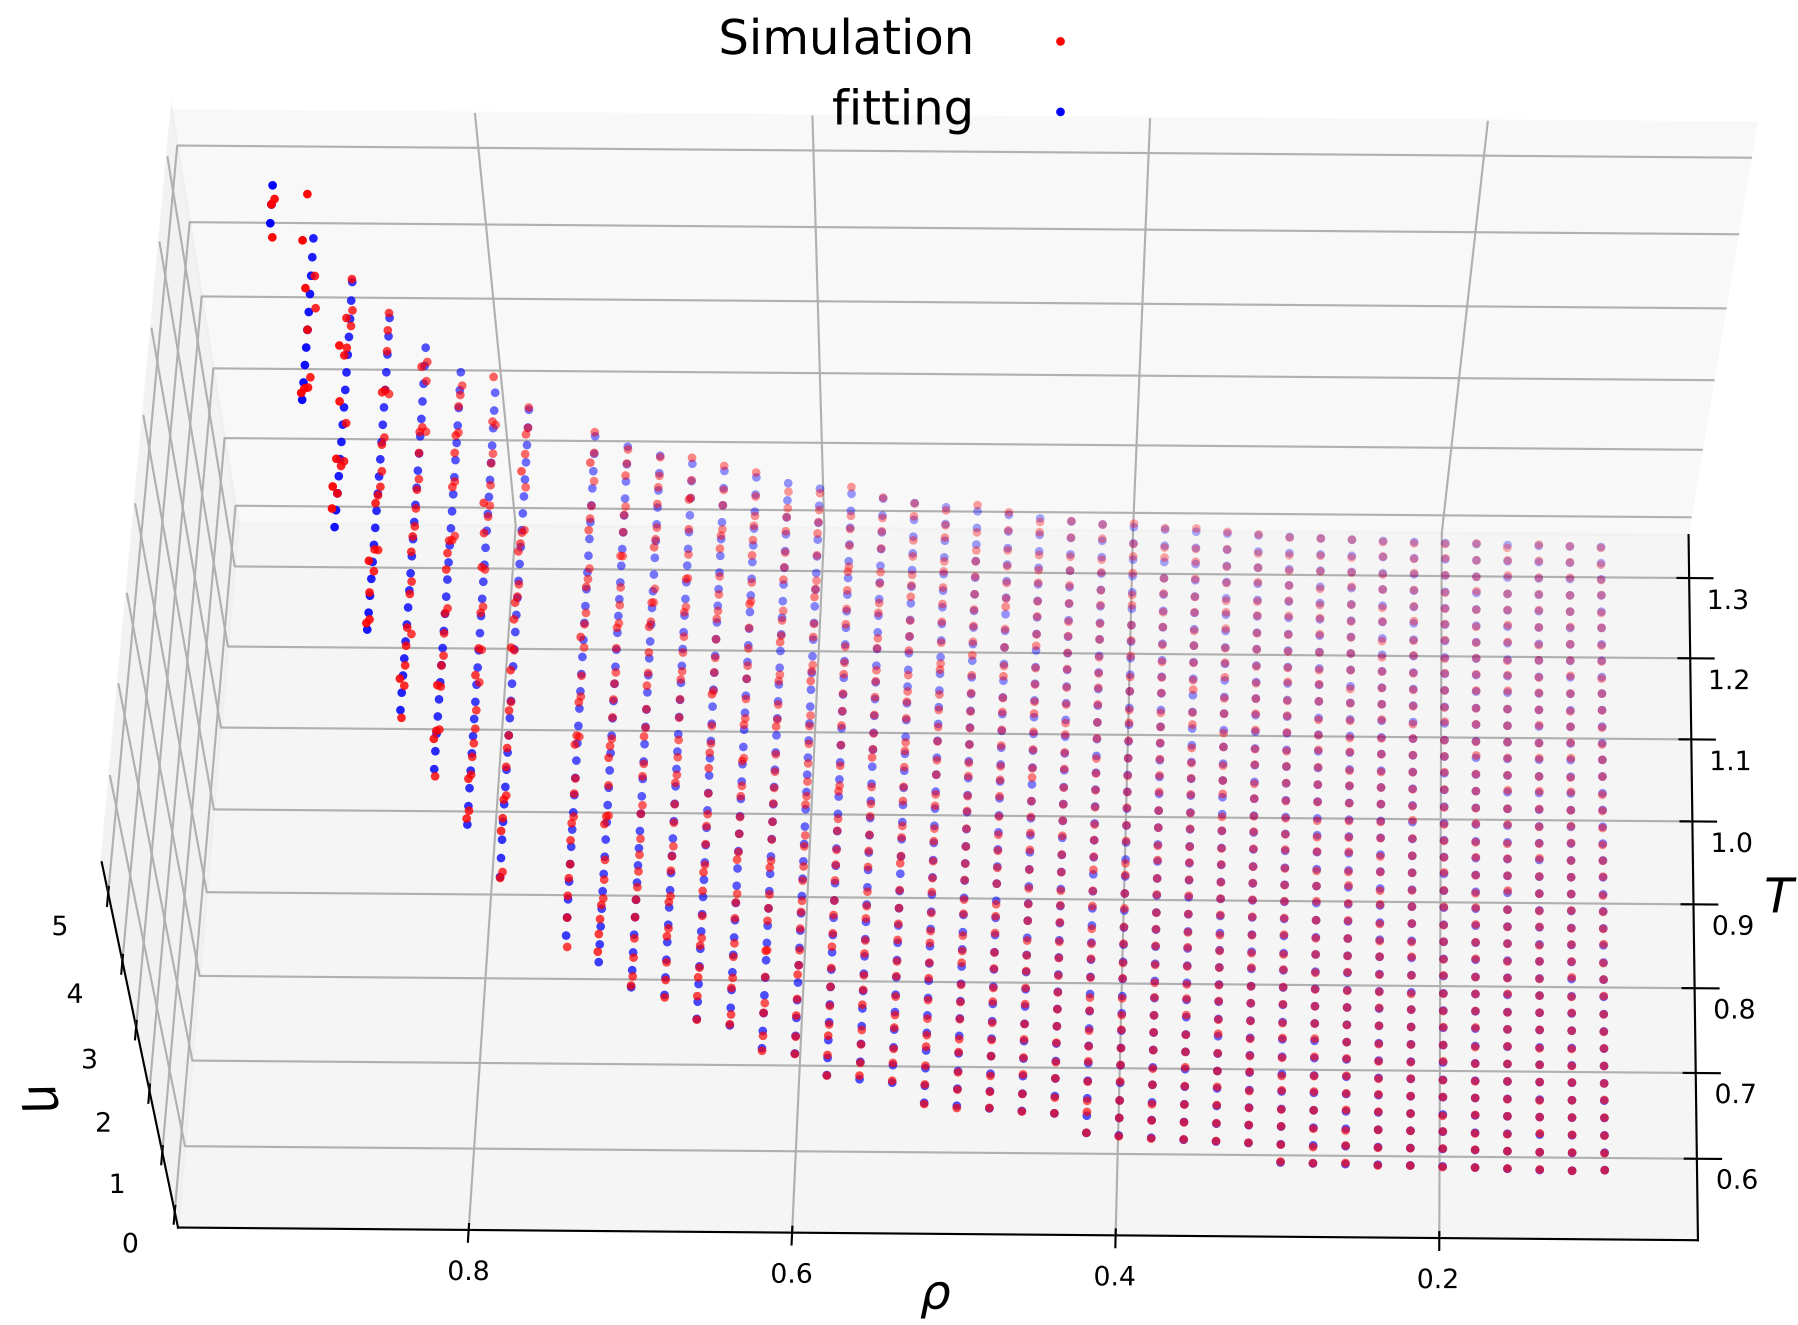

Supplement: c9cp05445f1.zip [file c9cp05445f1.zip]

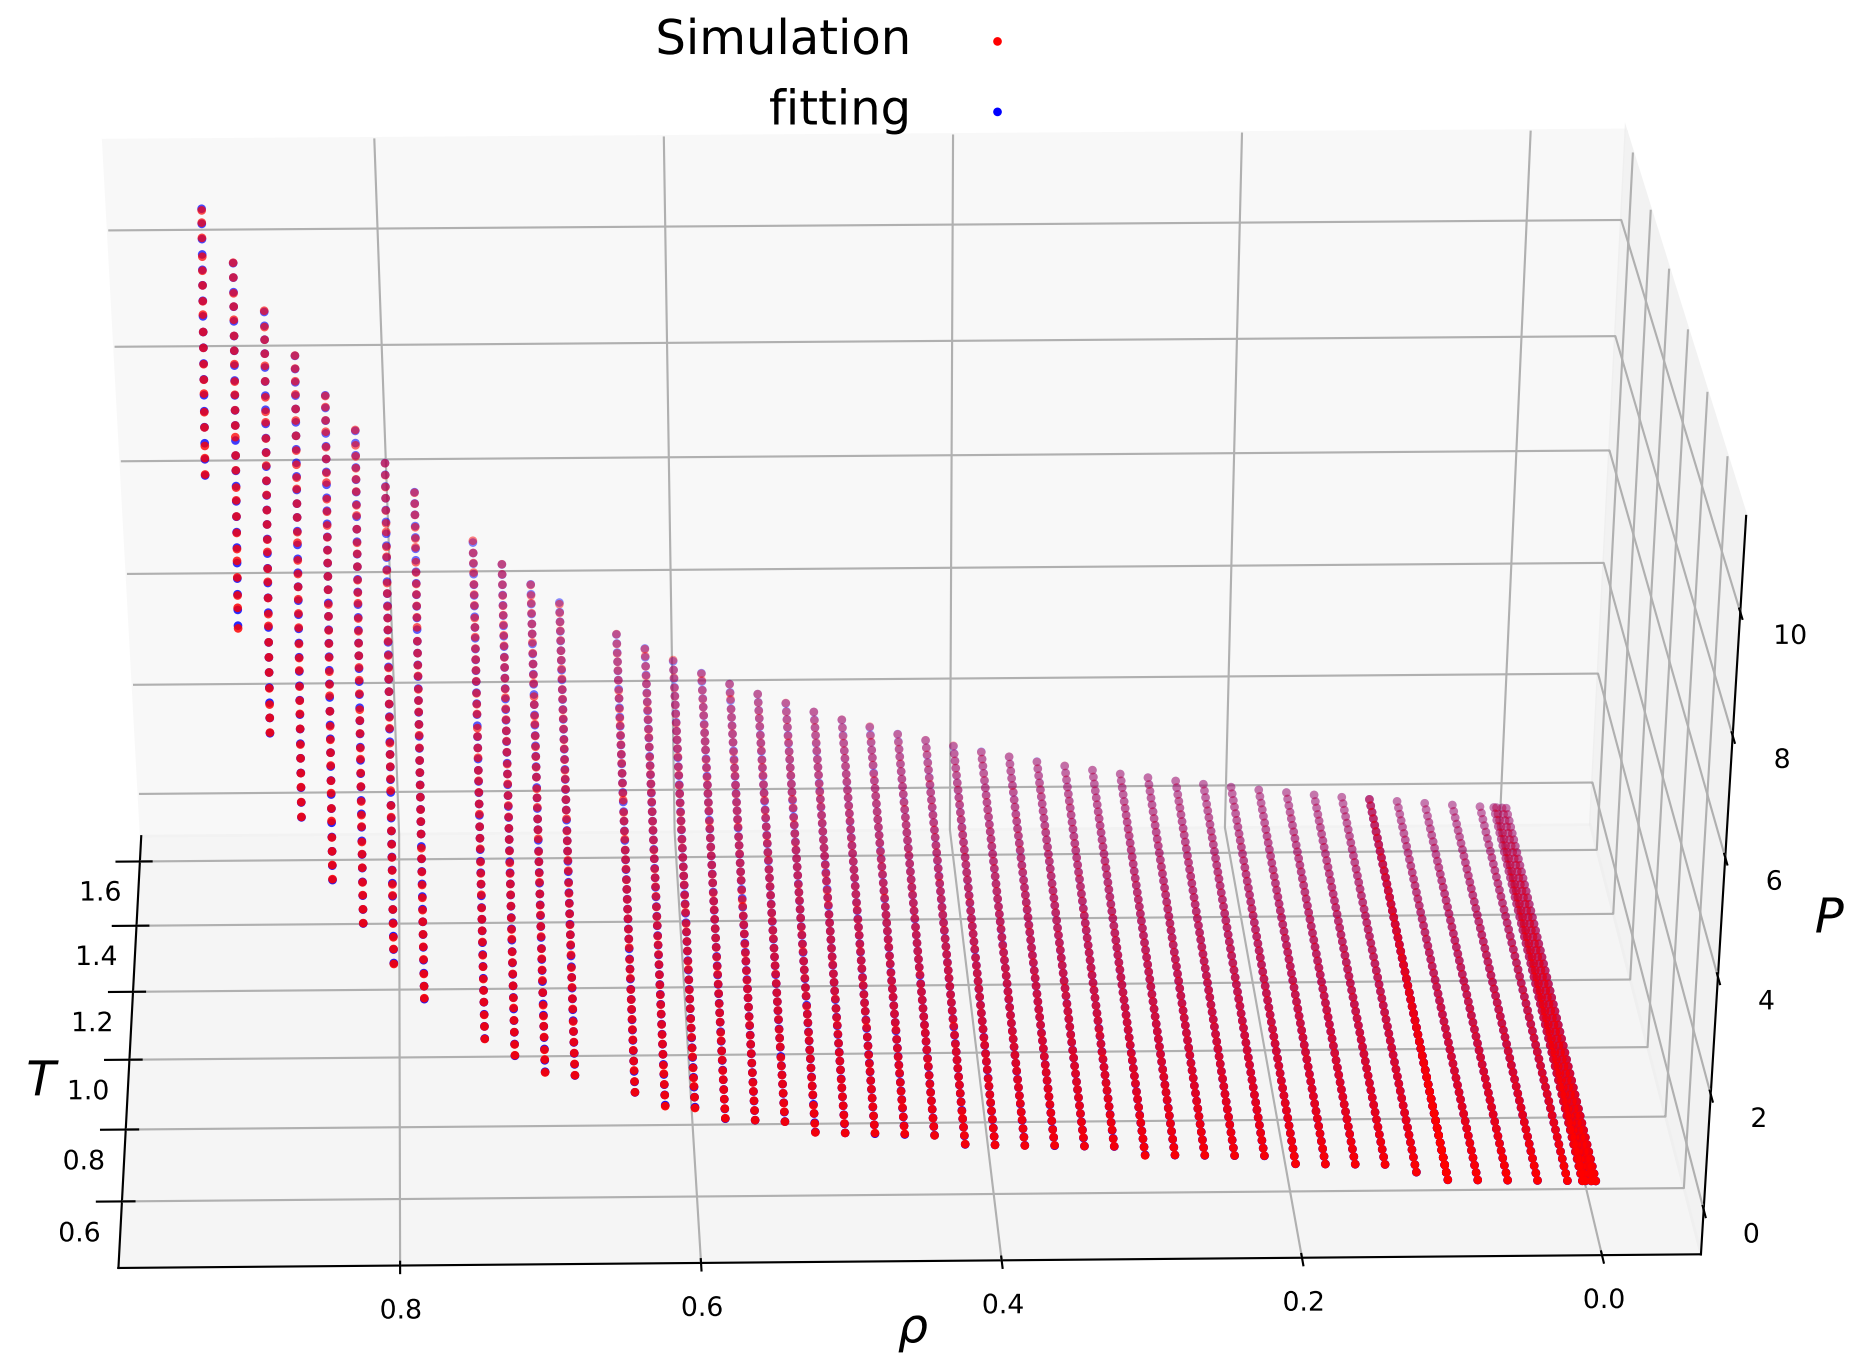

Supplement: c9cp05445f1.zip [file c9cp05445f1.zip]

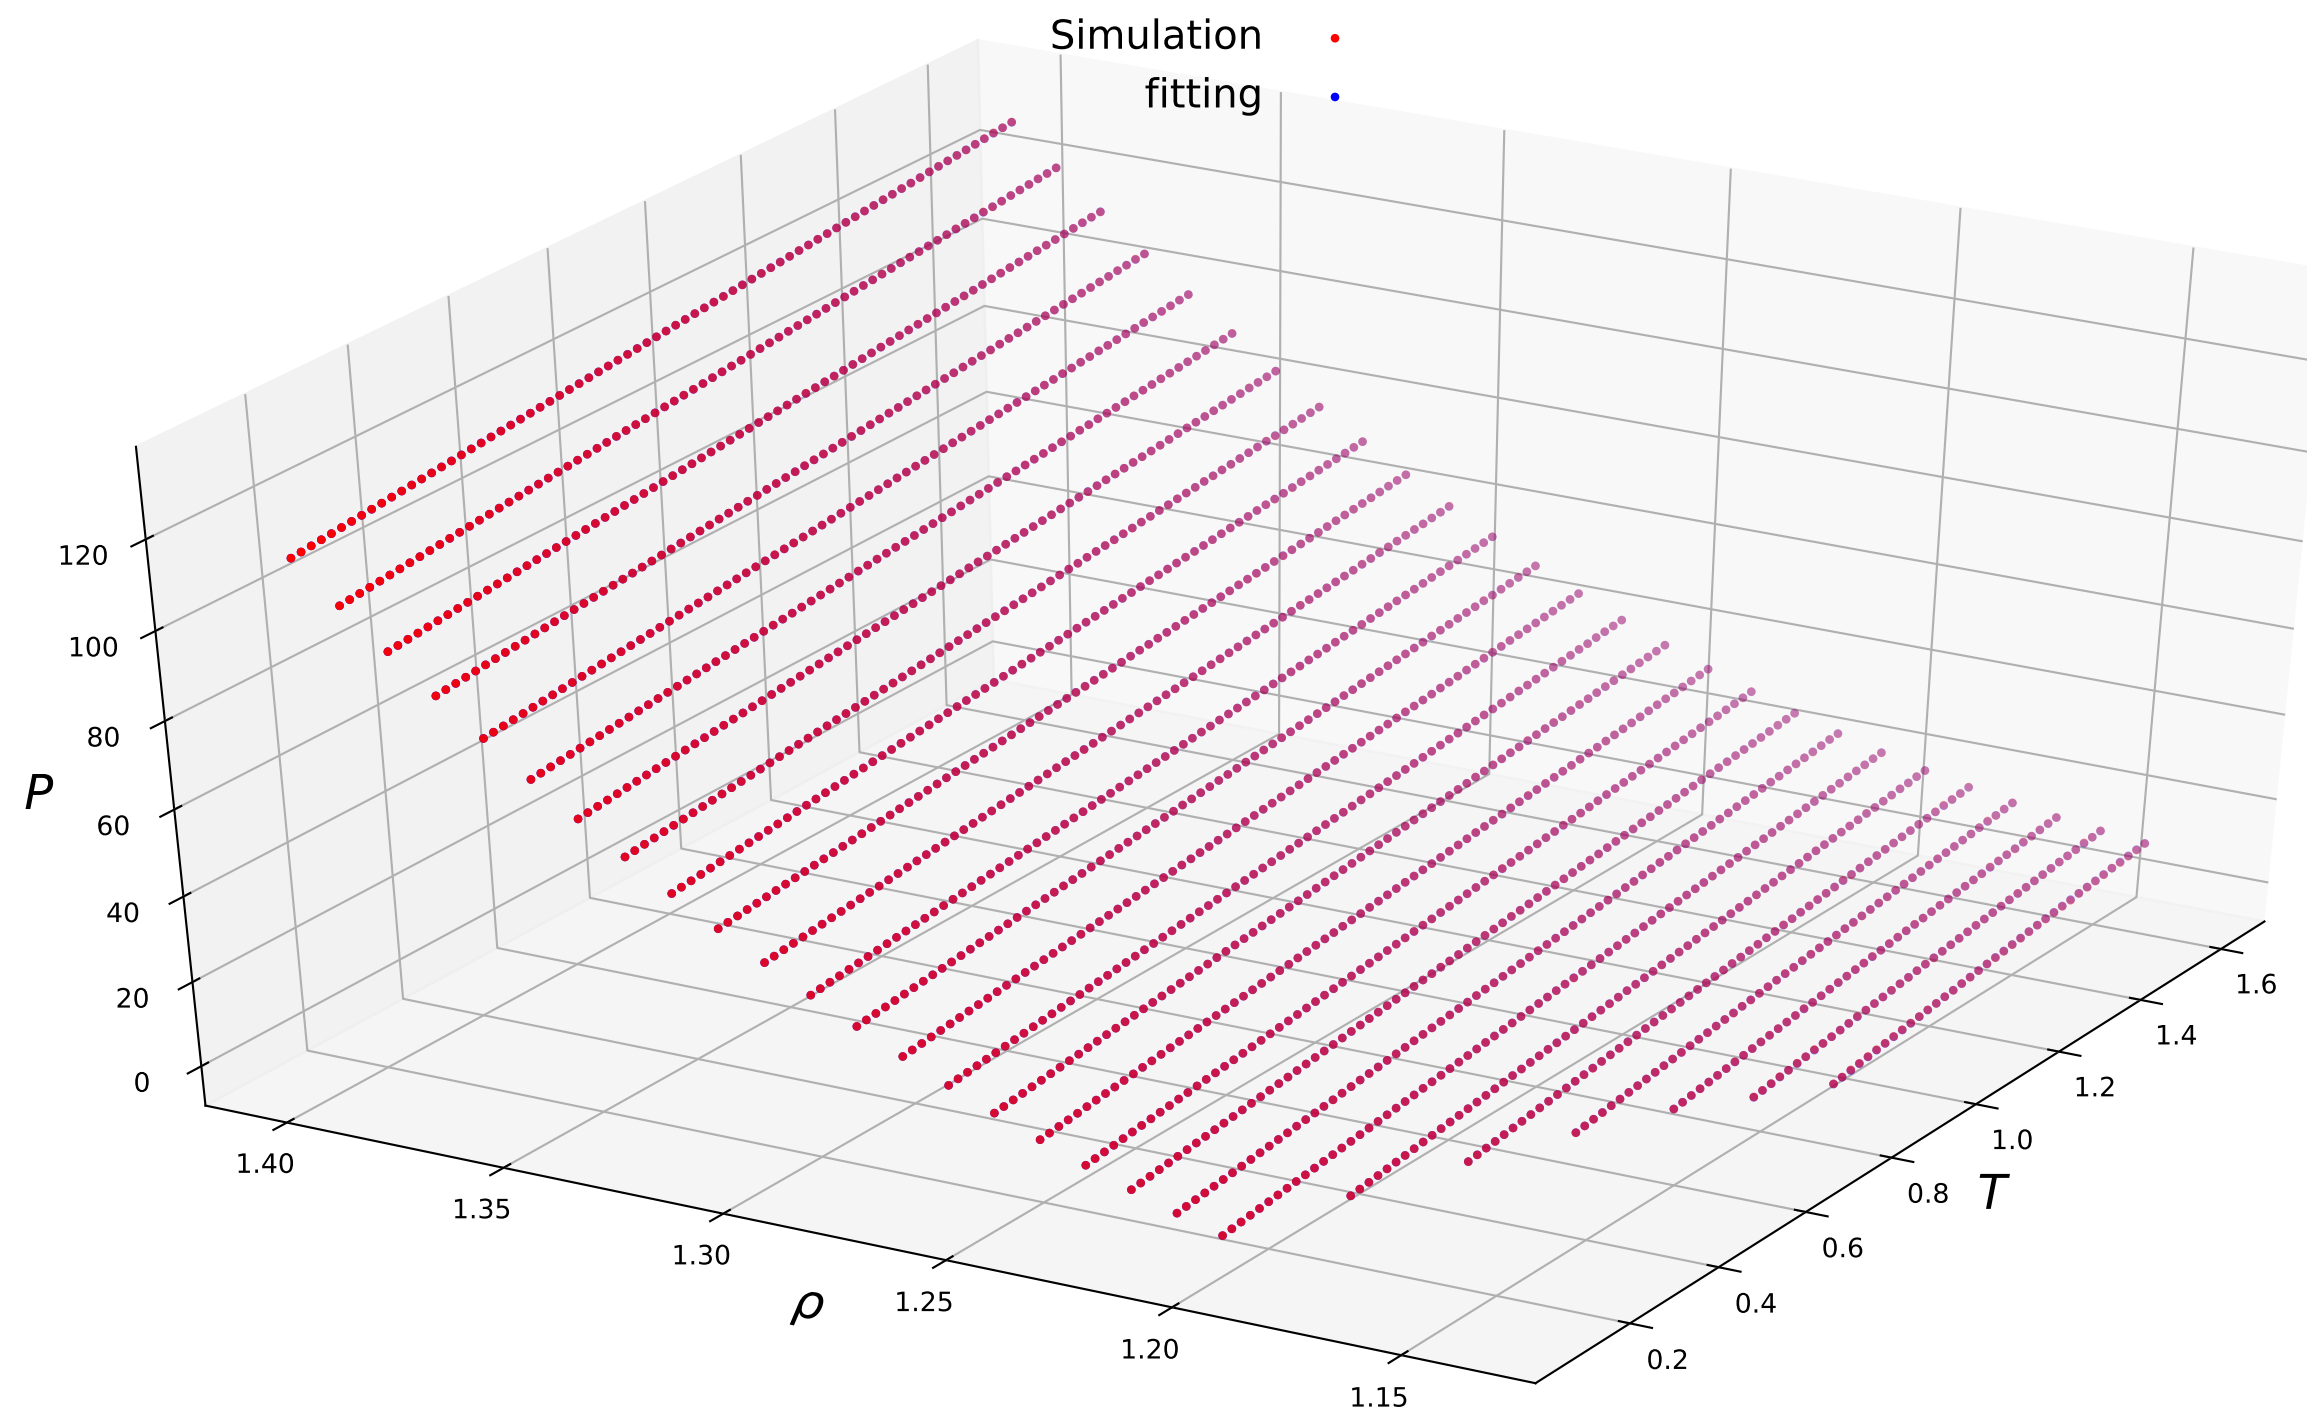

Supplement: c9cp05445f1.zip [file c9cp05445f1.zip]

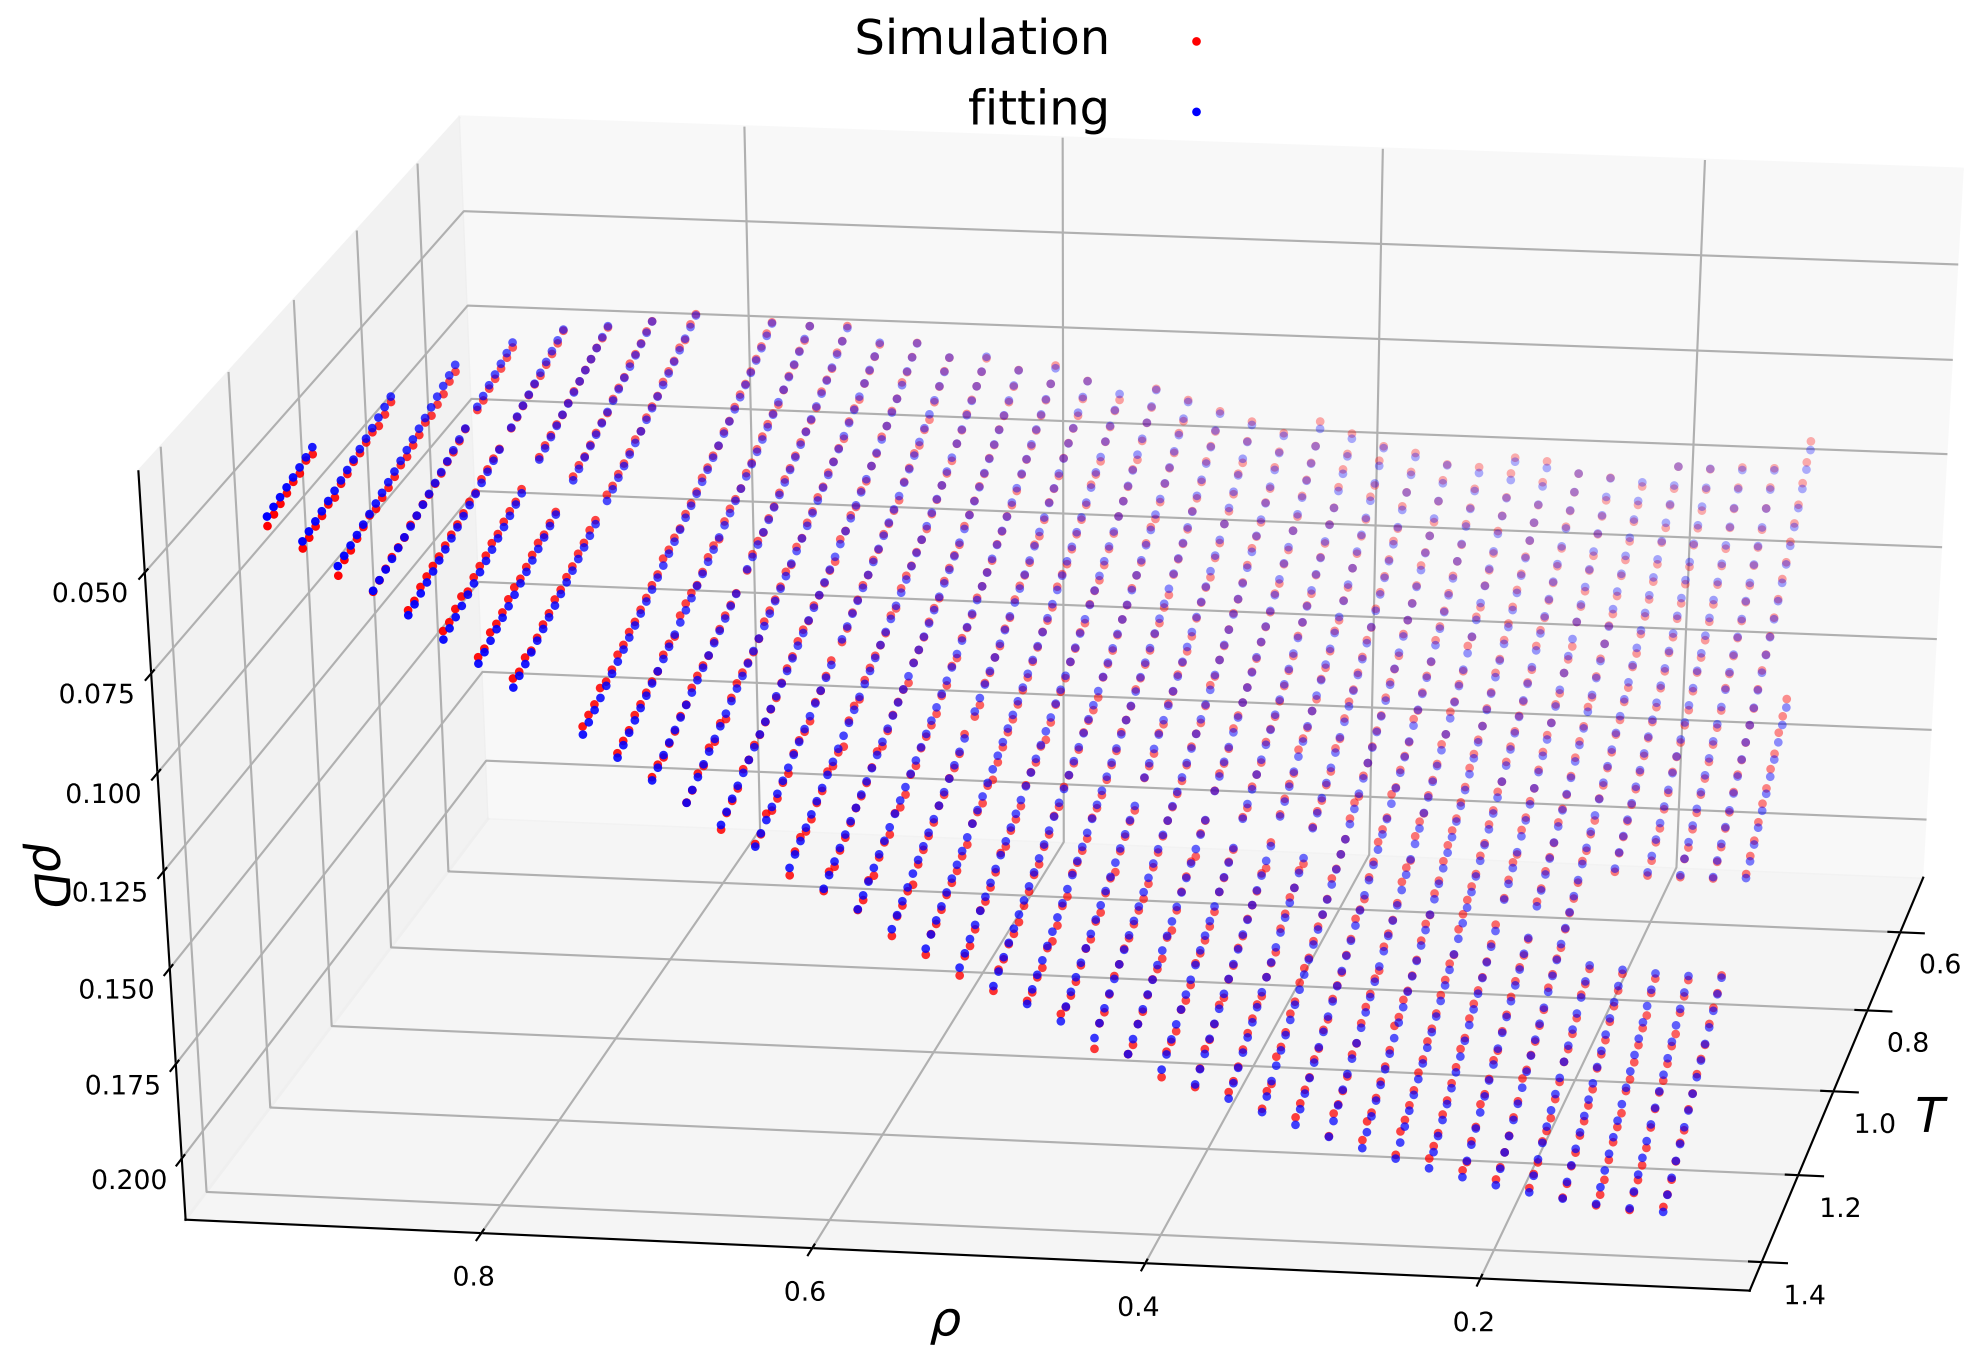

Supplement: c9cp05445f1.zip [file c9cp05445f1.zip]

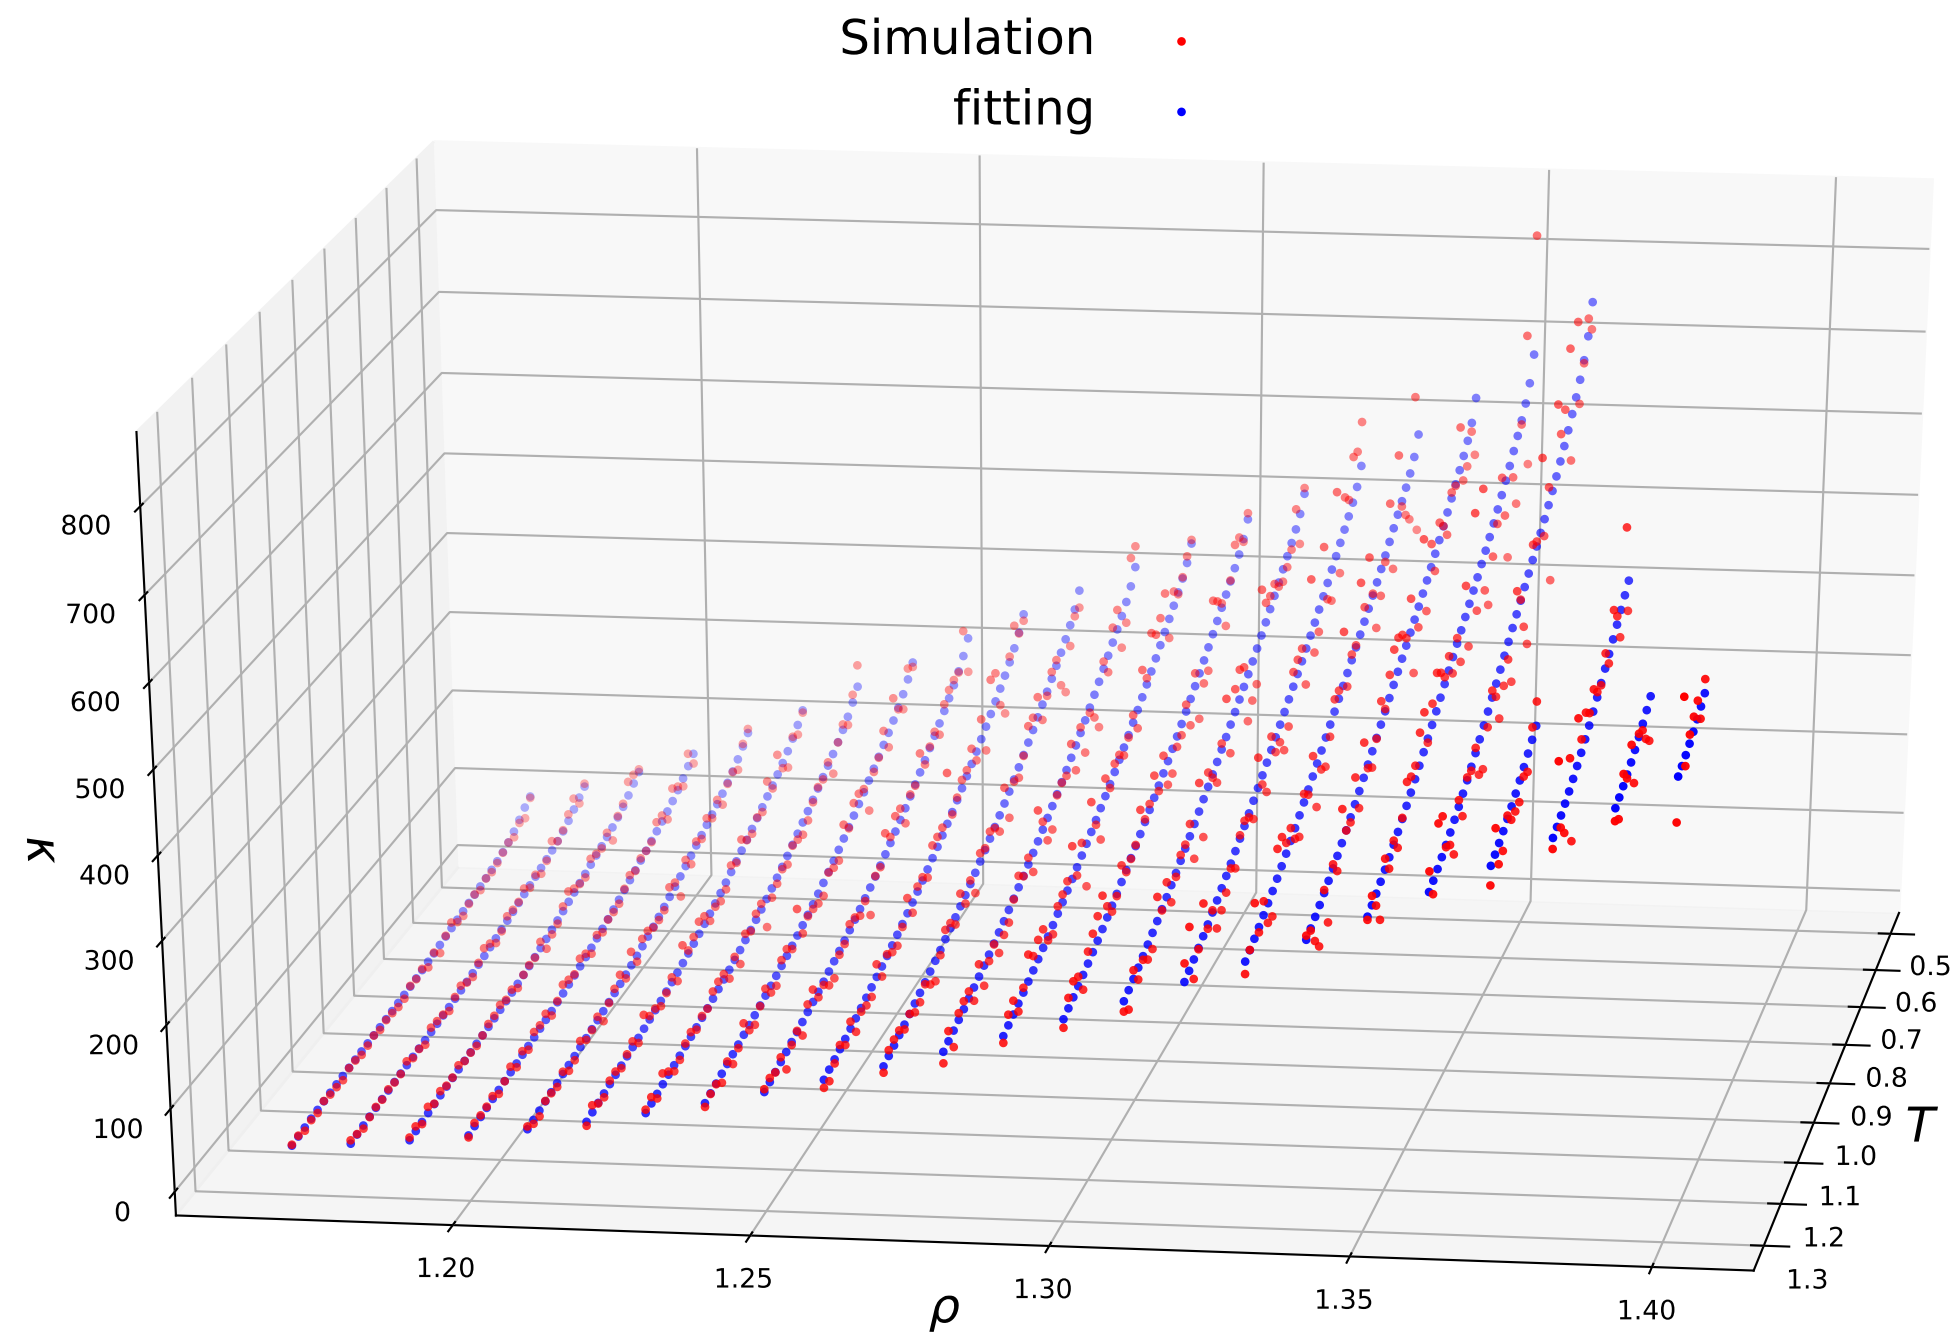

Supplement: c9cp05445f1.zip [file c9cp05445f1.zip]

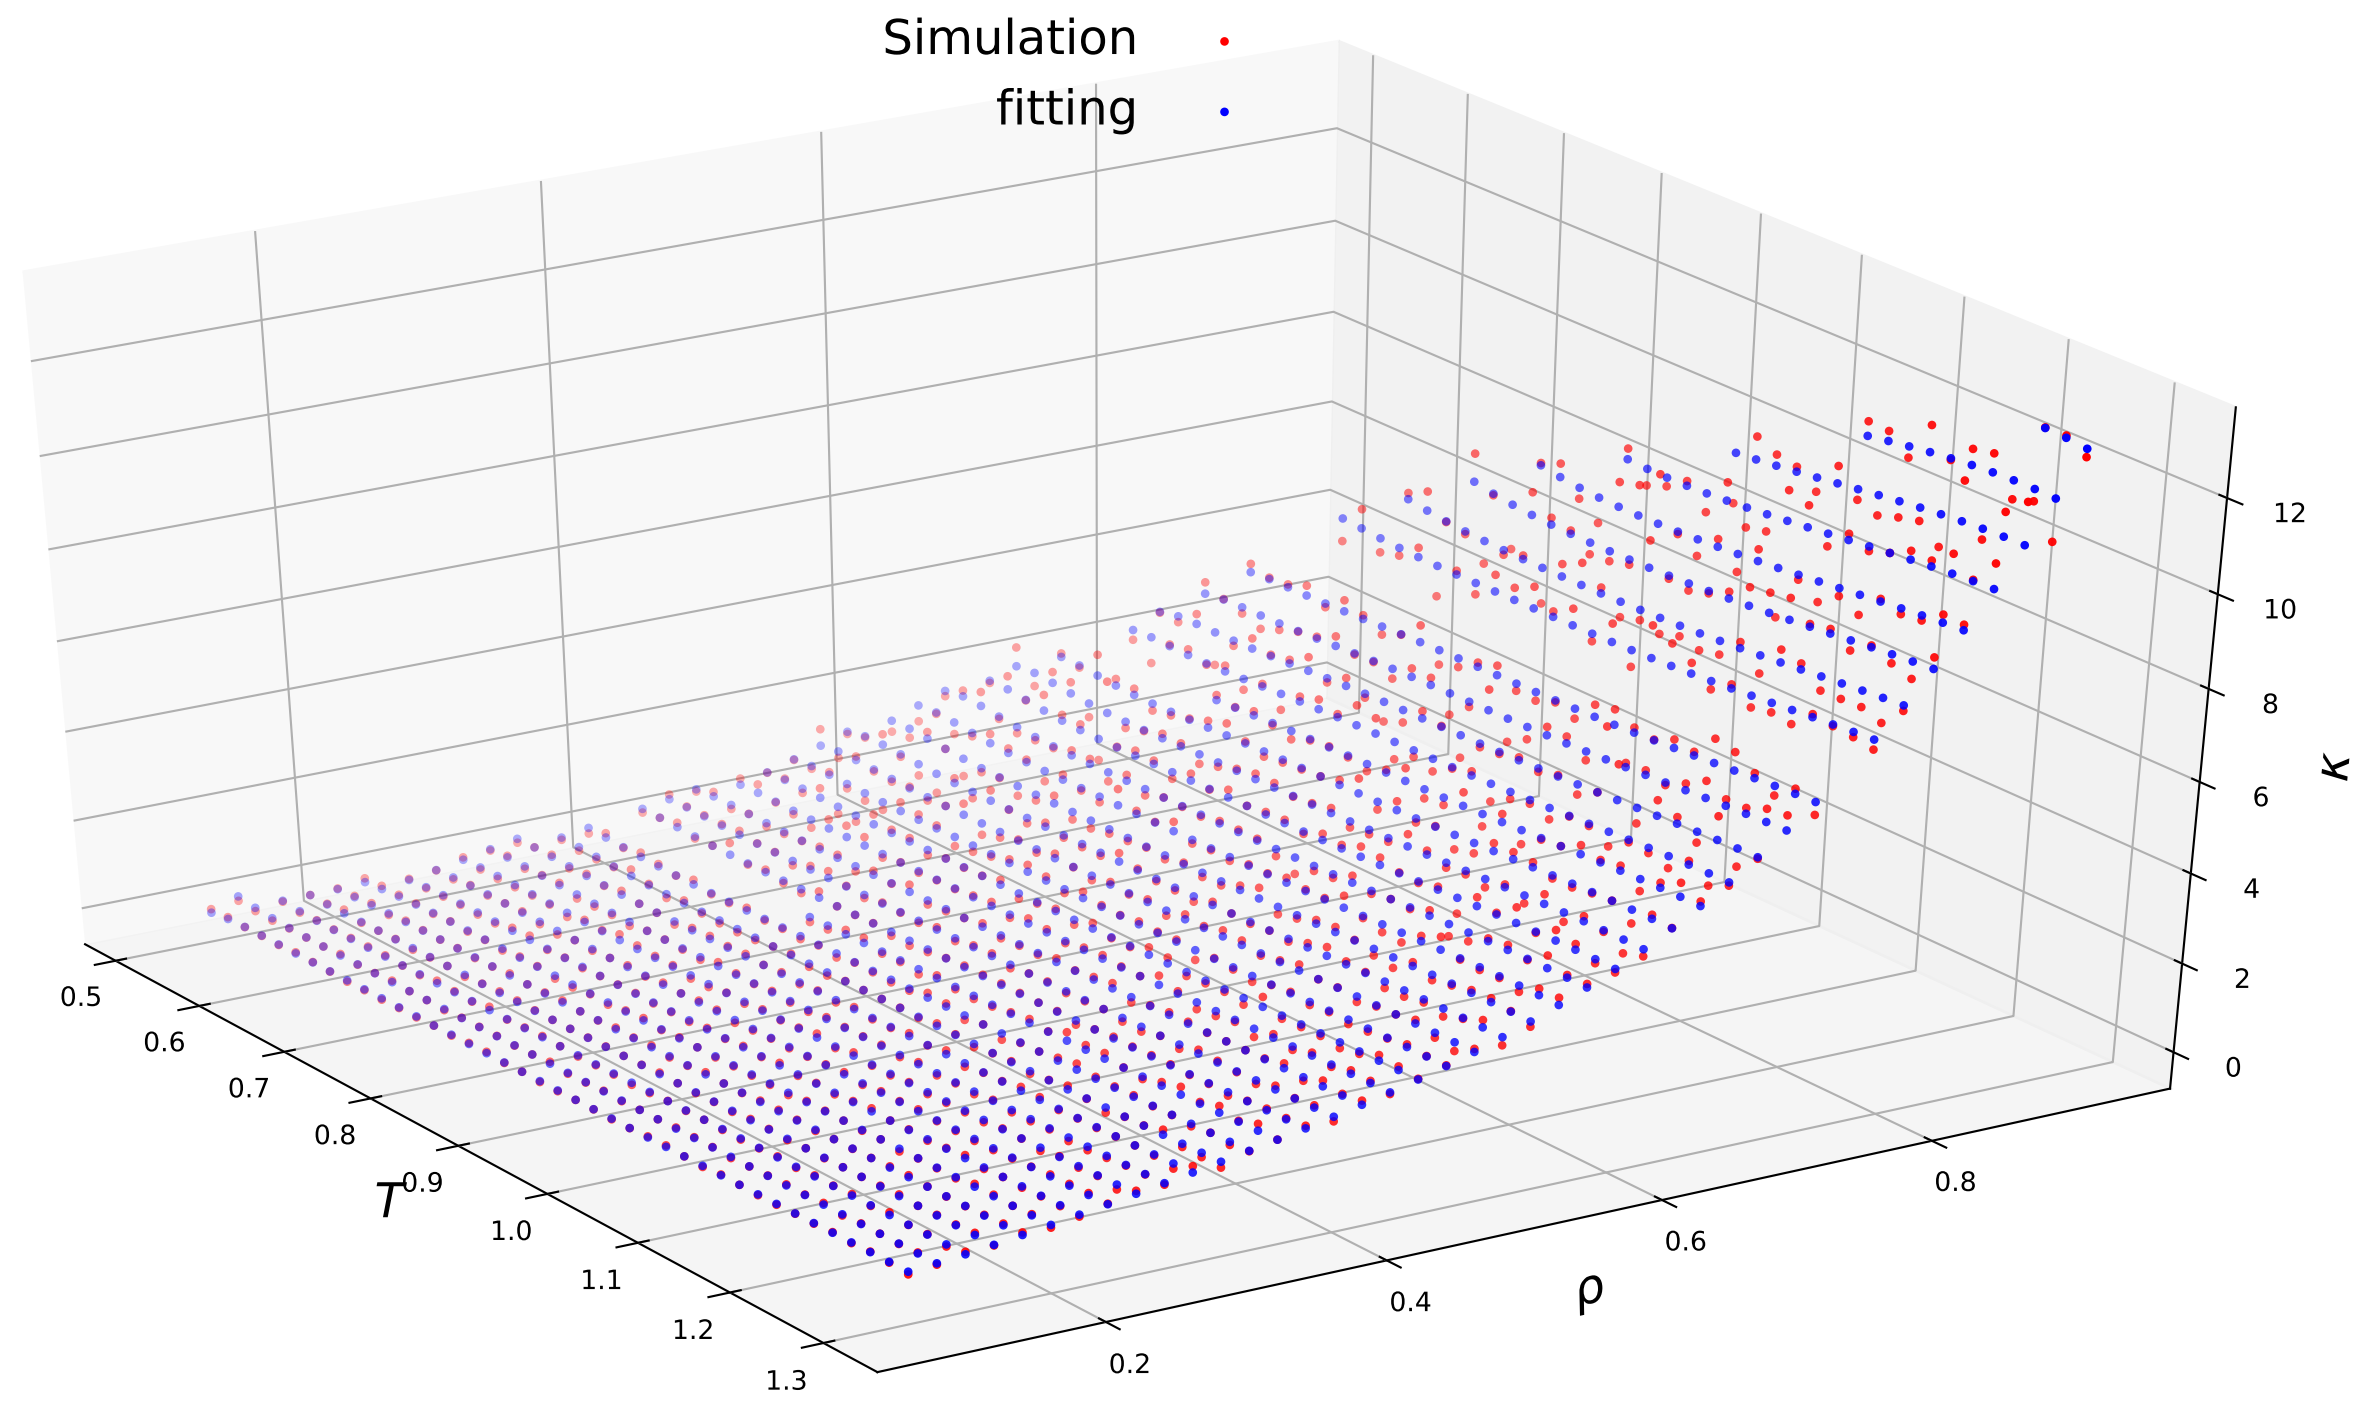

Supplement: c9cp05445f1.zip [file c9cp05445f1.zip]

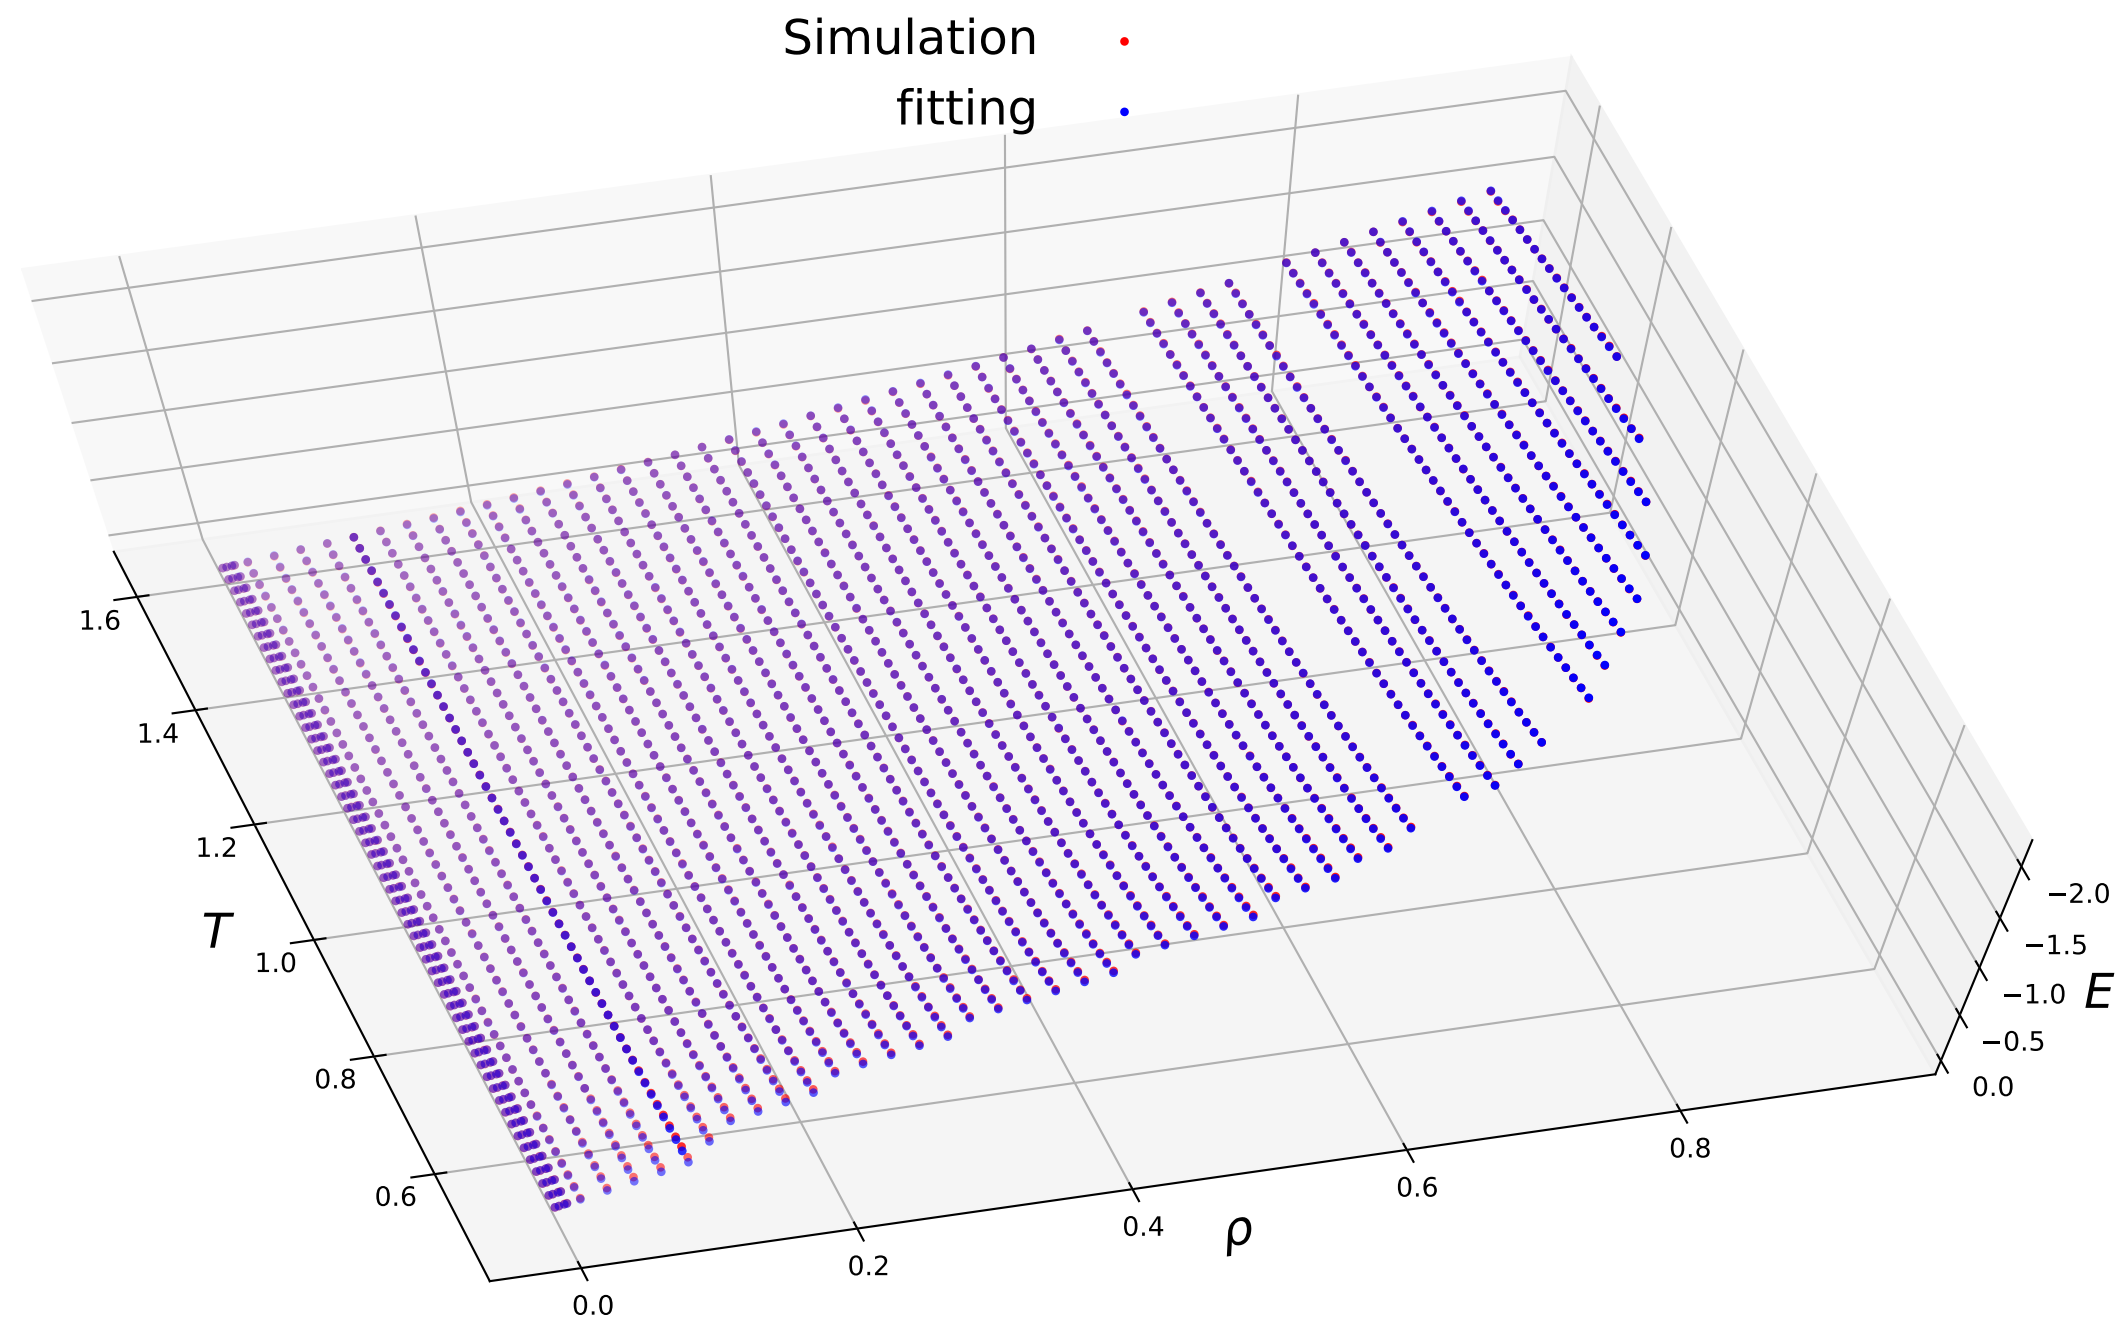

Supplement: c9cp05445f1.zip [file c9cp05445f1.zip]

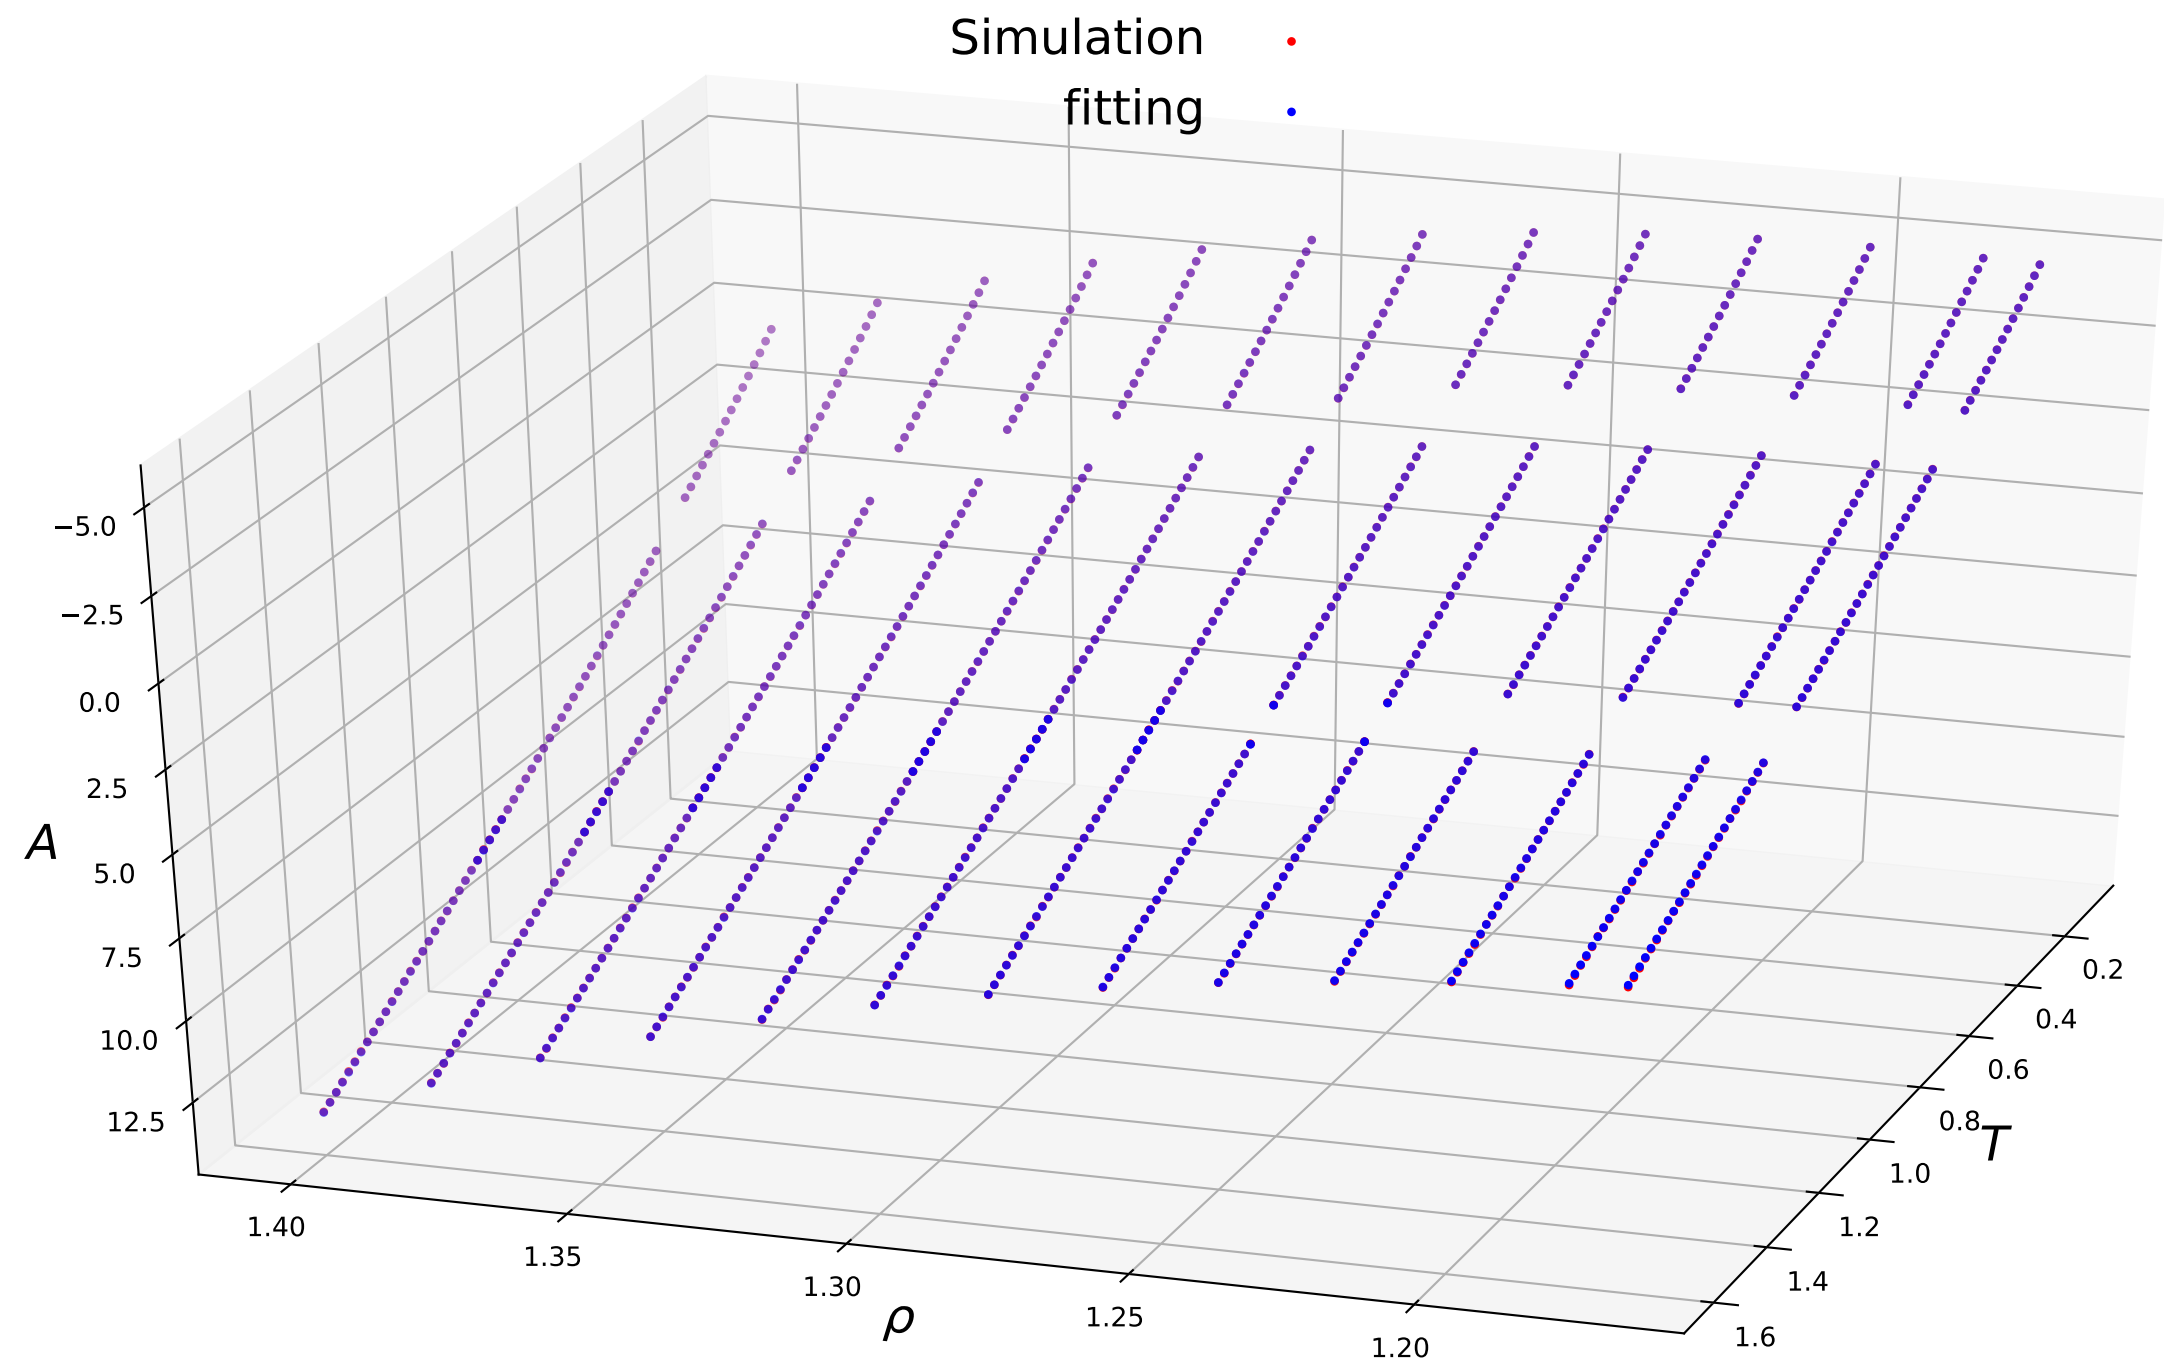

Supplement: c9cp05445f1.zip [file c9cp05445f1.zip]

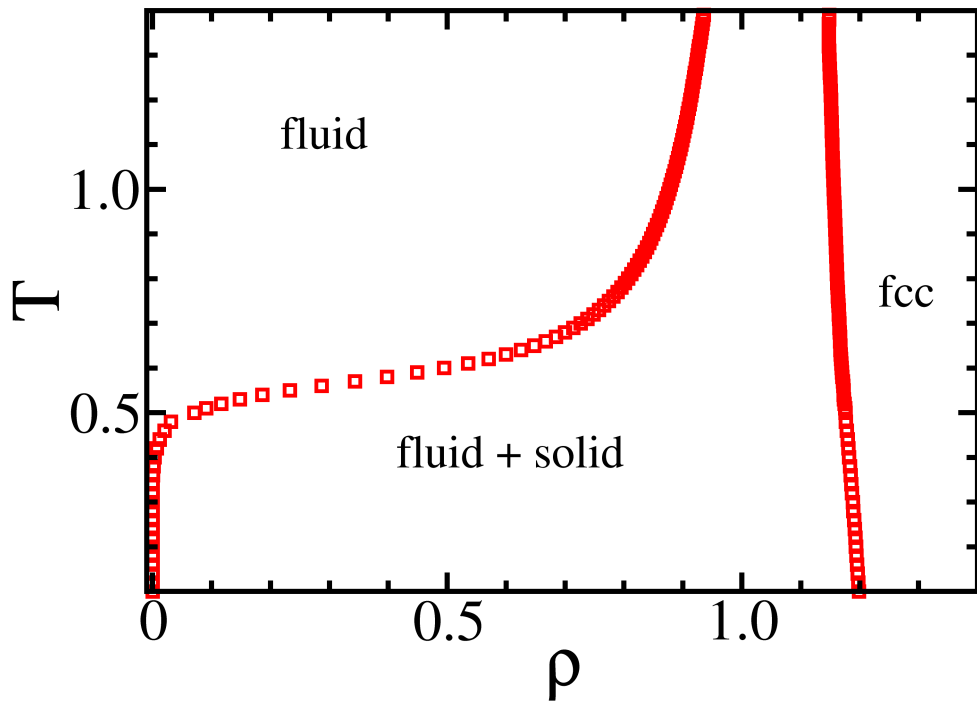

Supplement: c9cp05445f1.zip [file c9cp05445f1.zip]

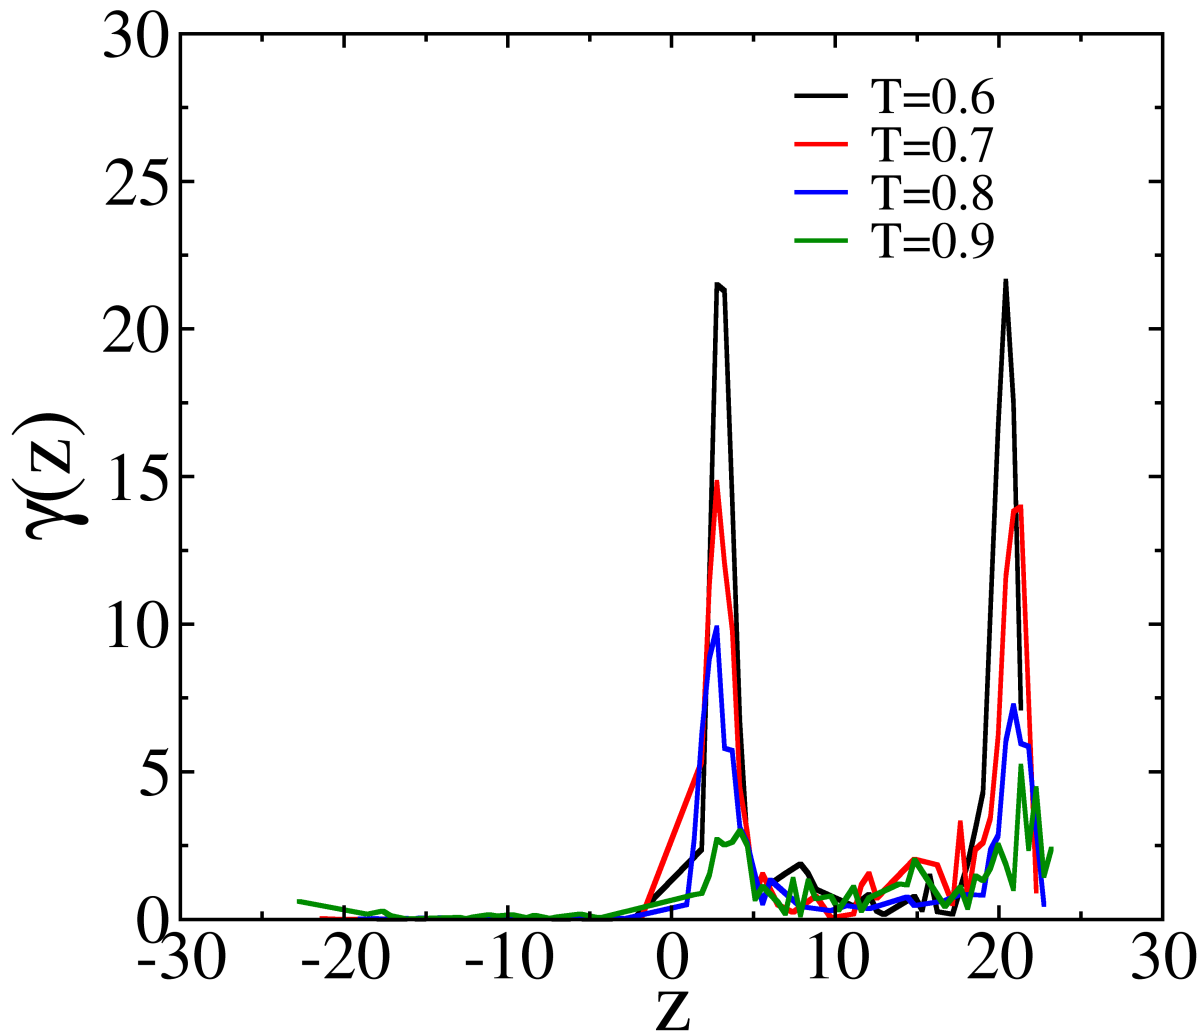

Supplement: c9cp05445f2.zip [file c9cp05445f2.zip]

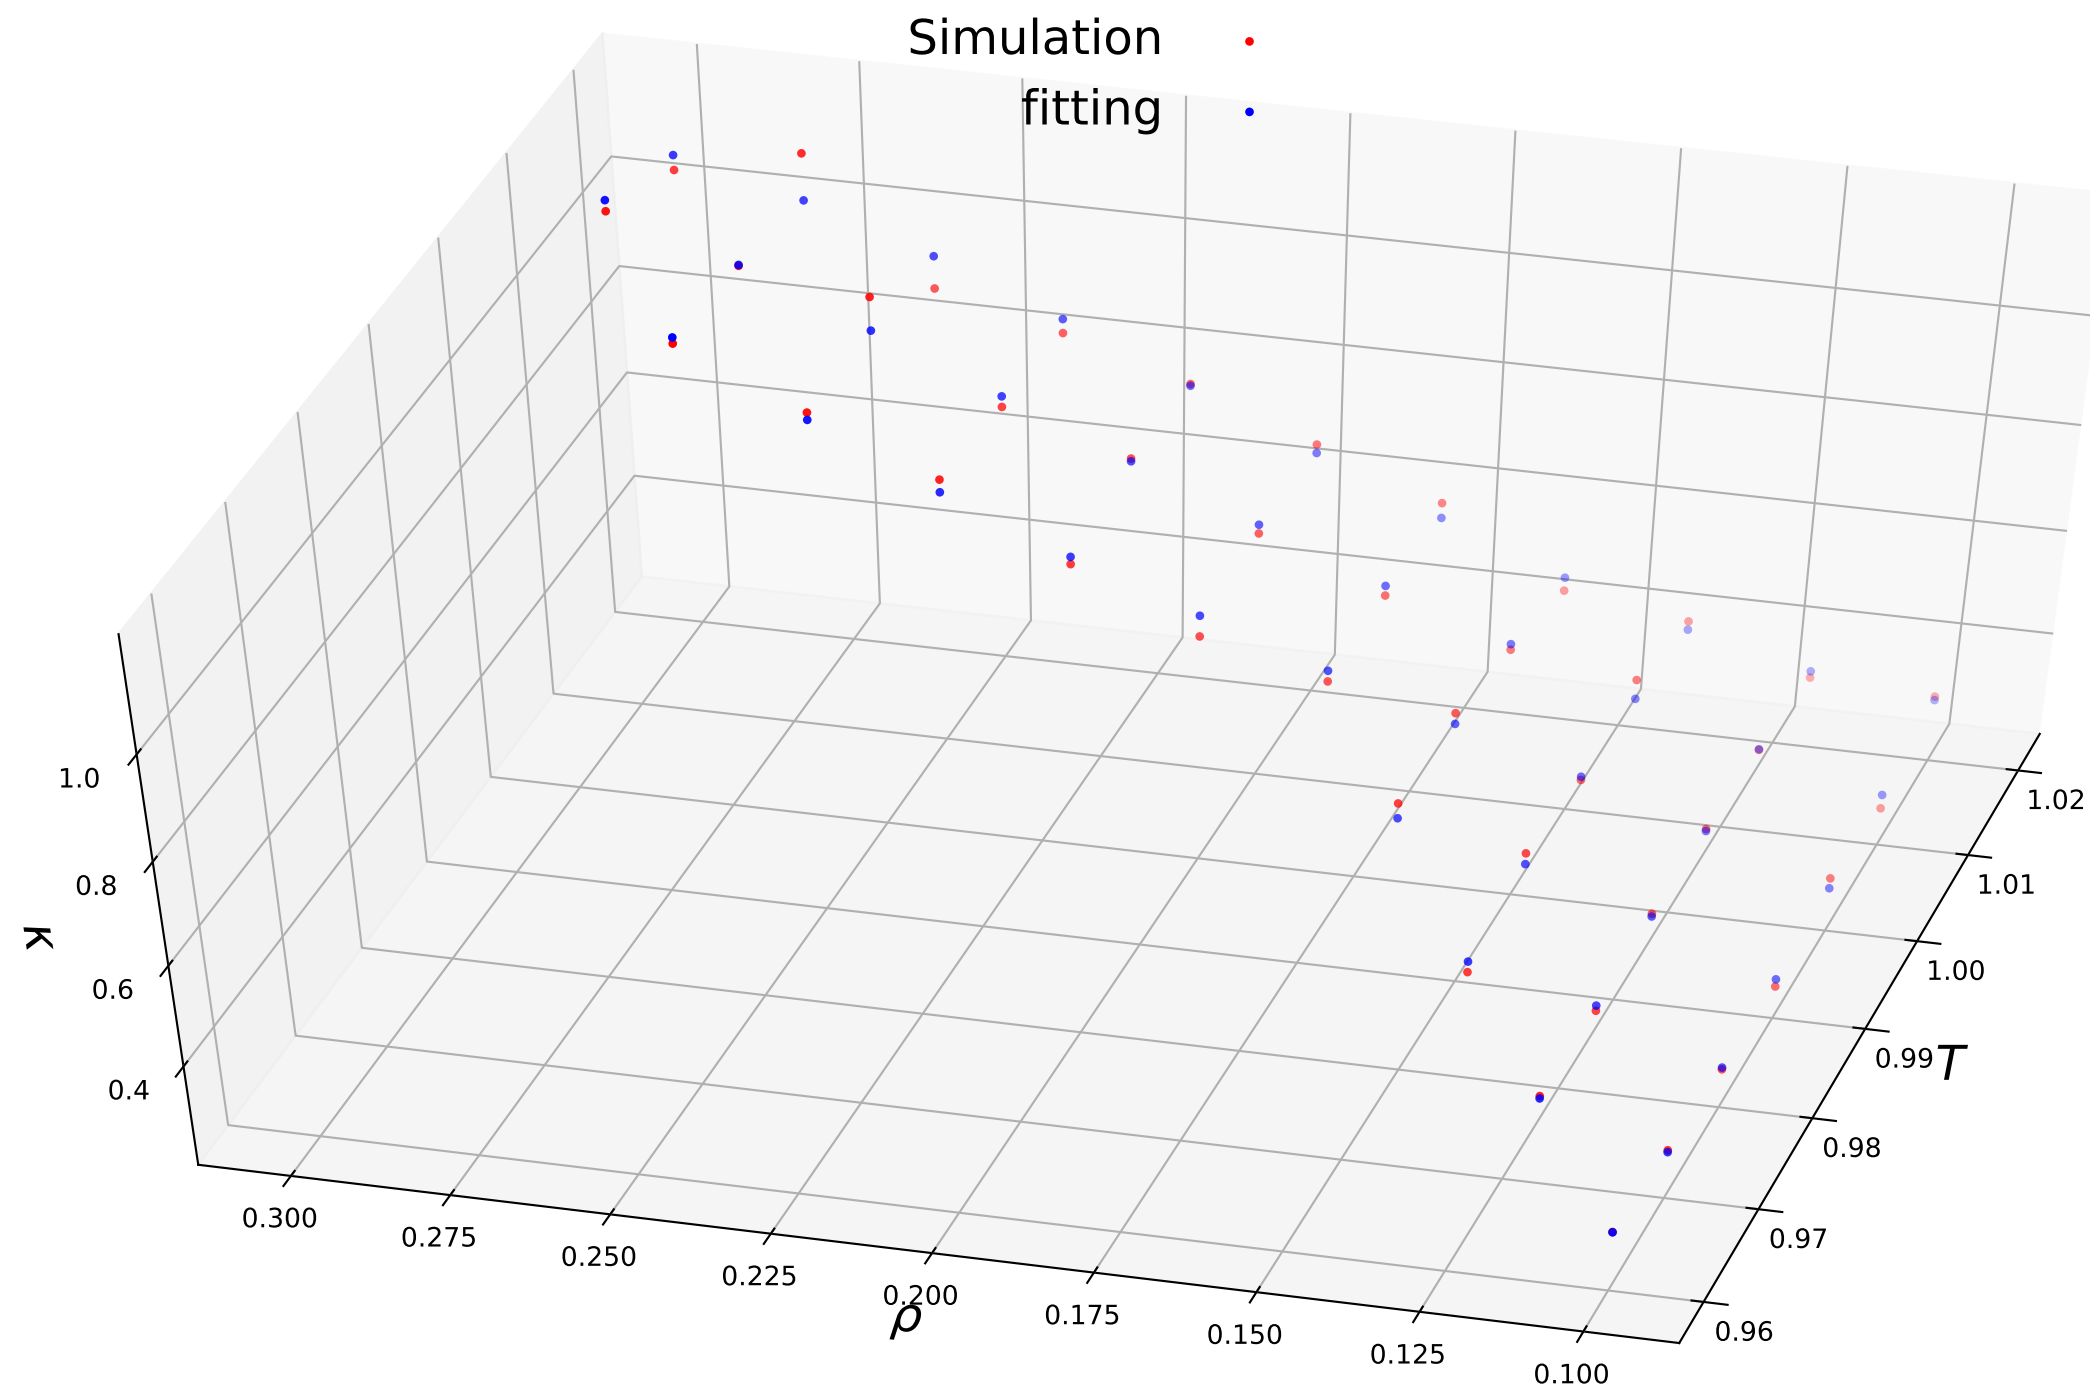

Supplement: c9cp05445f2.zip [file c9cp05445f2.zip]

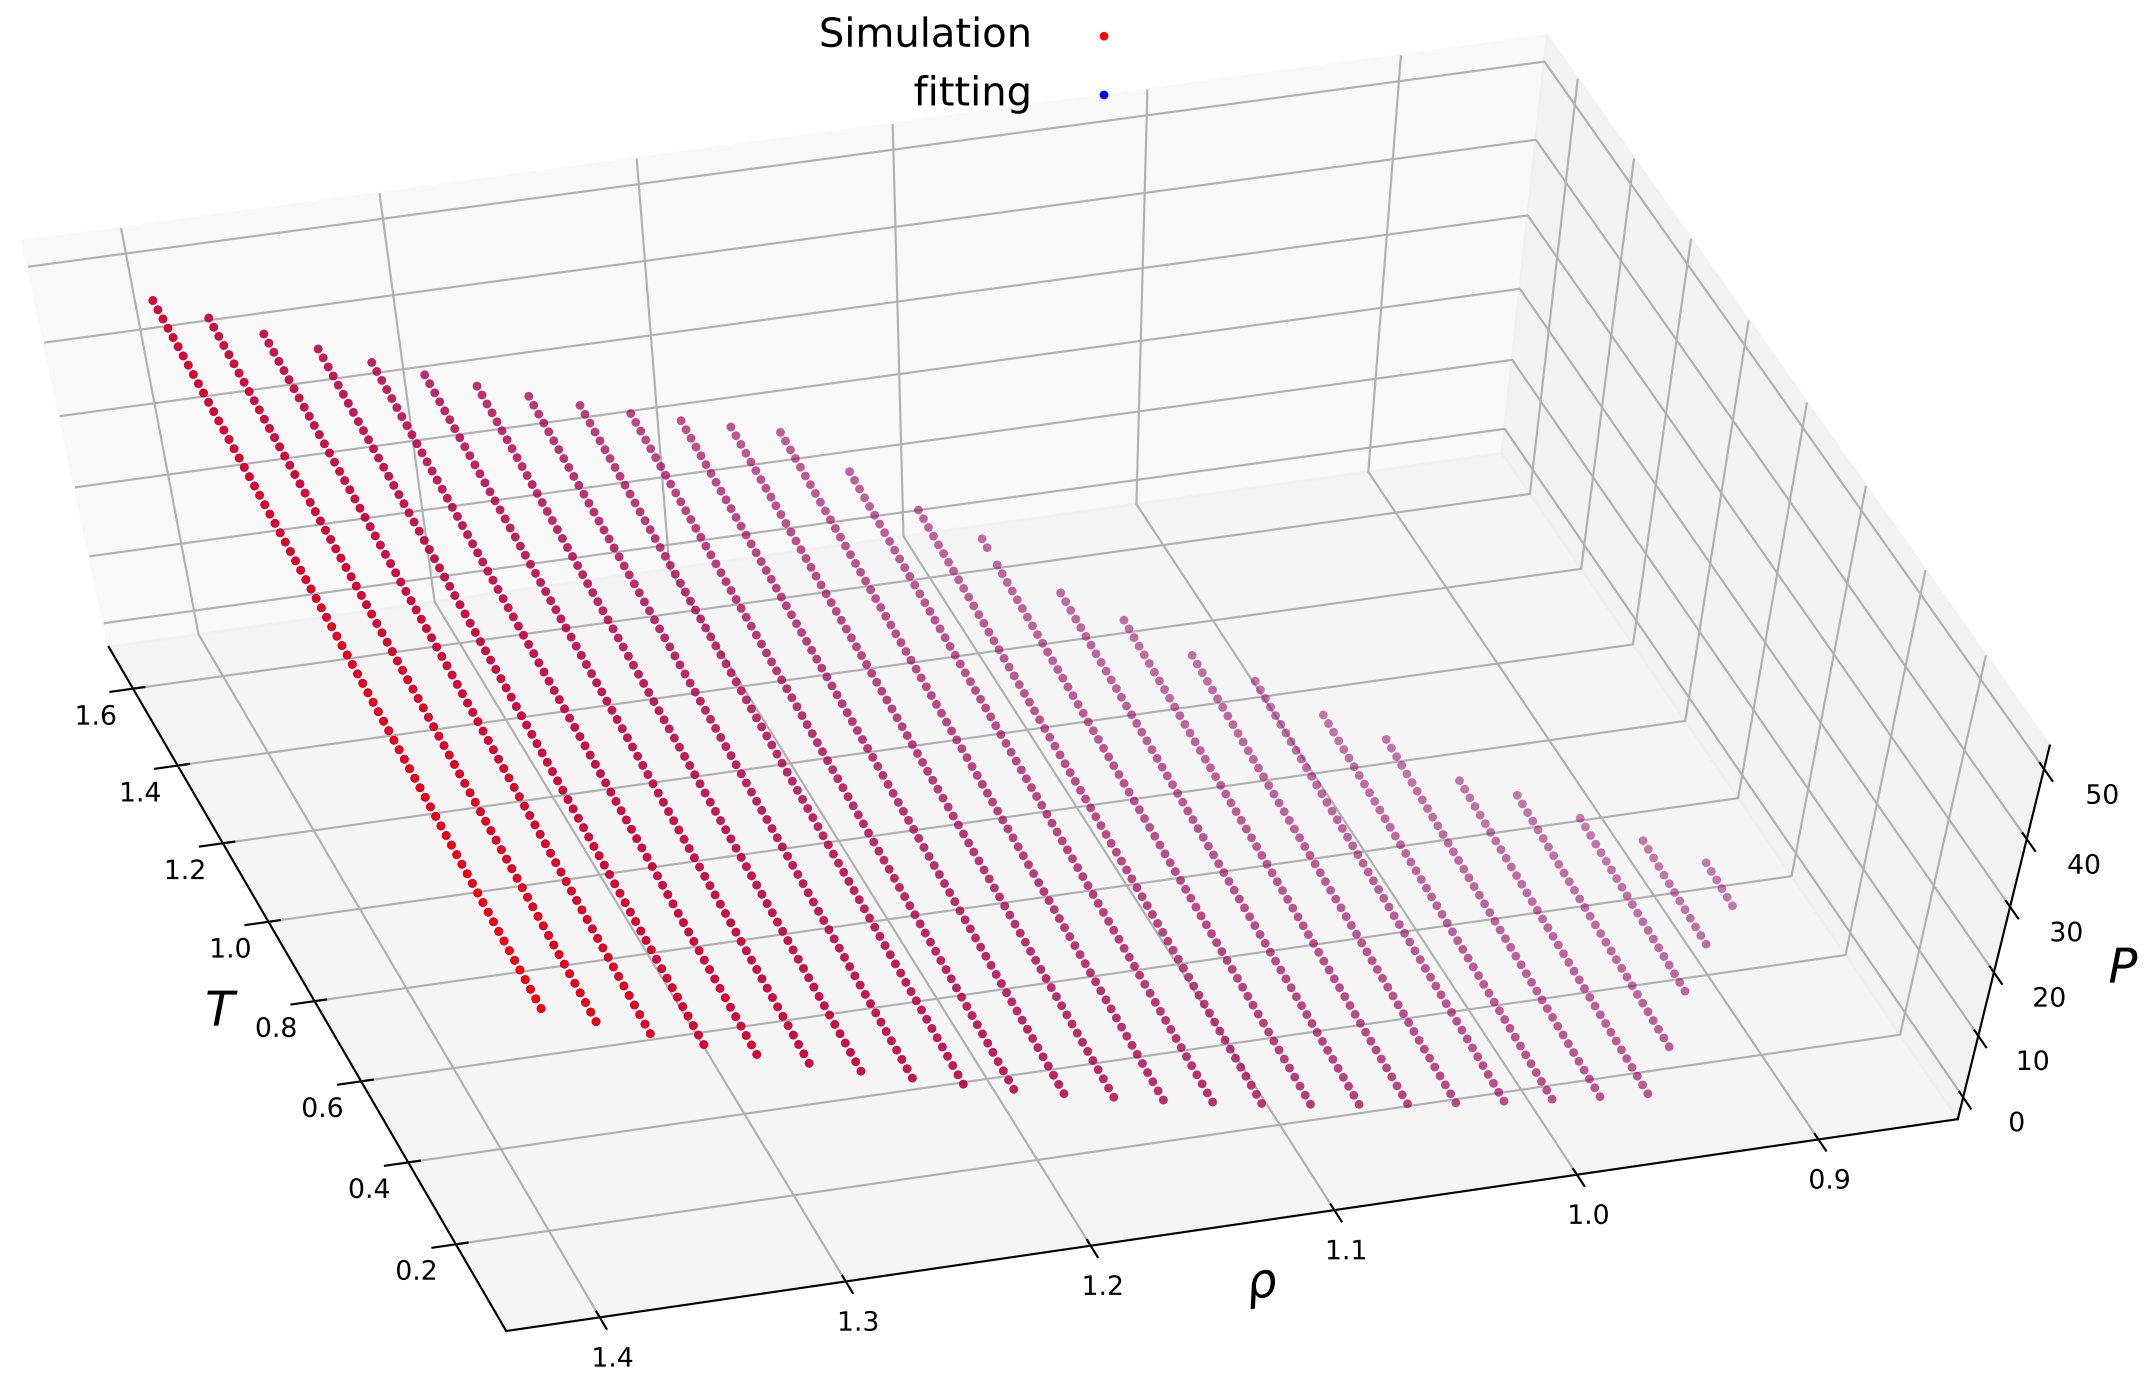

Supplement: c9cp05445f2.zip [file c9cp05445f2.zip]

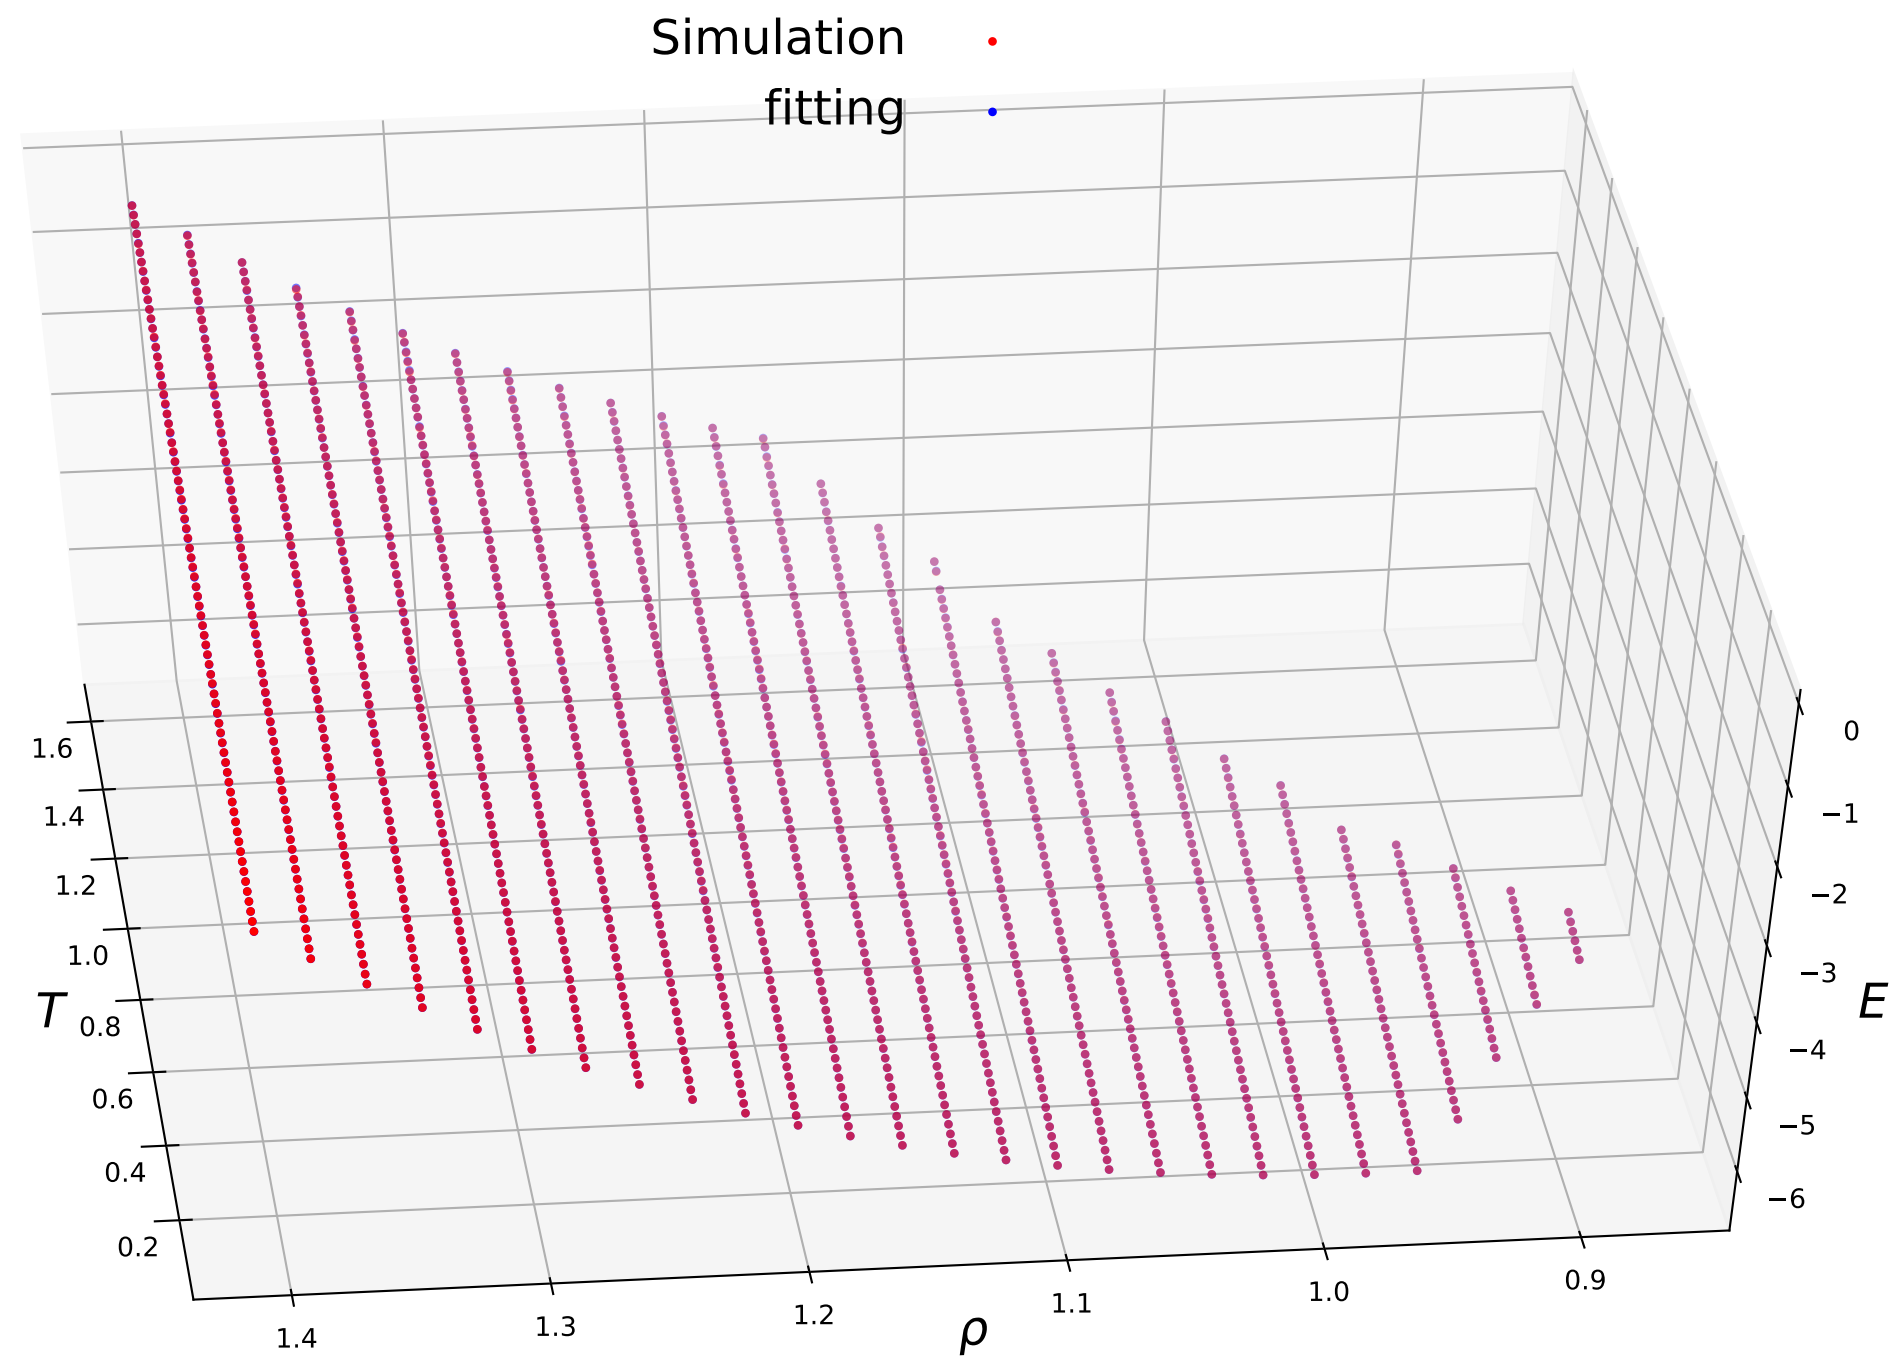

Supplement: c9cp05445f2.zip [file c9cp05445f2.zip]

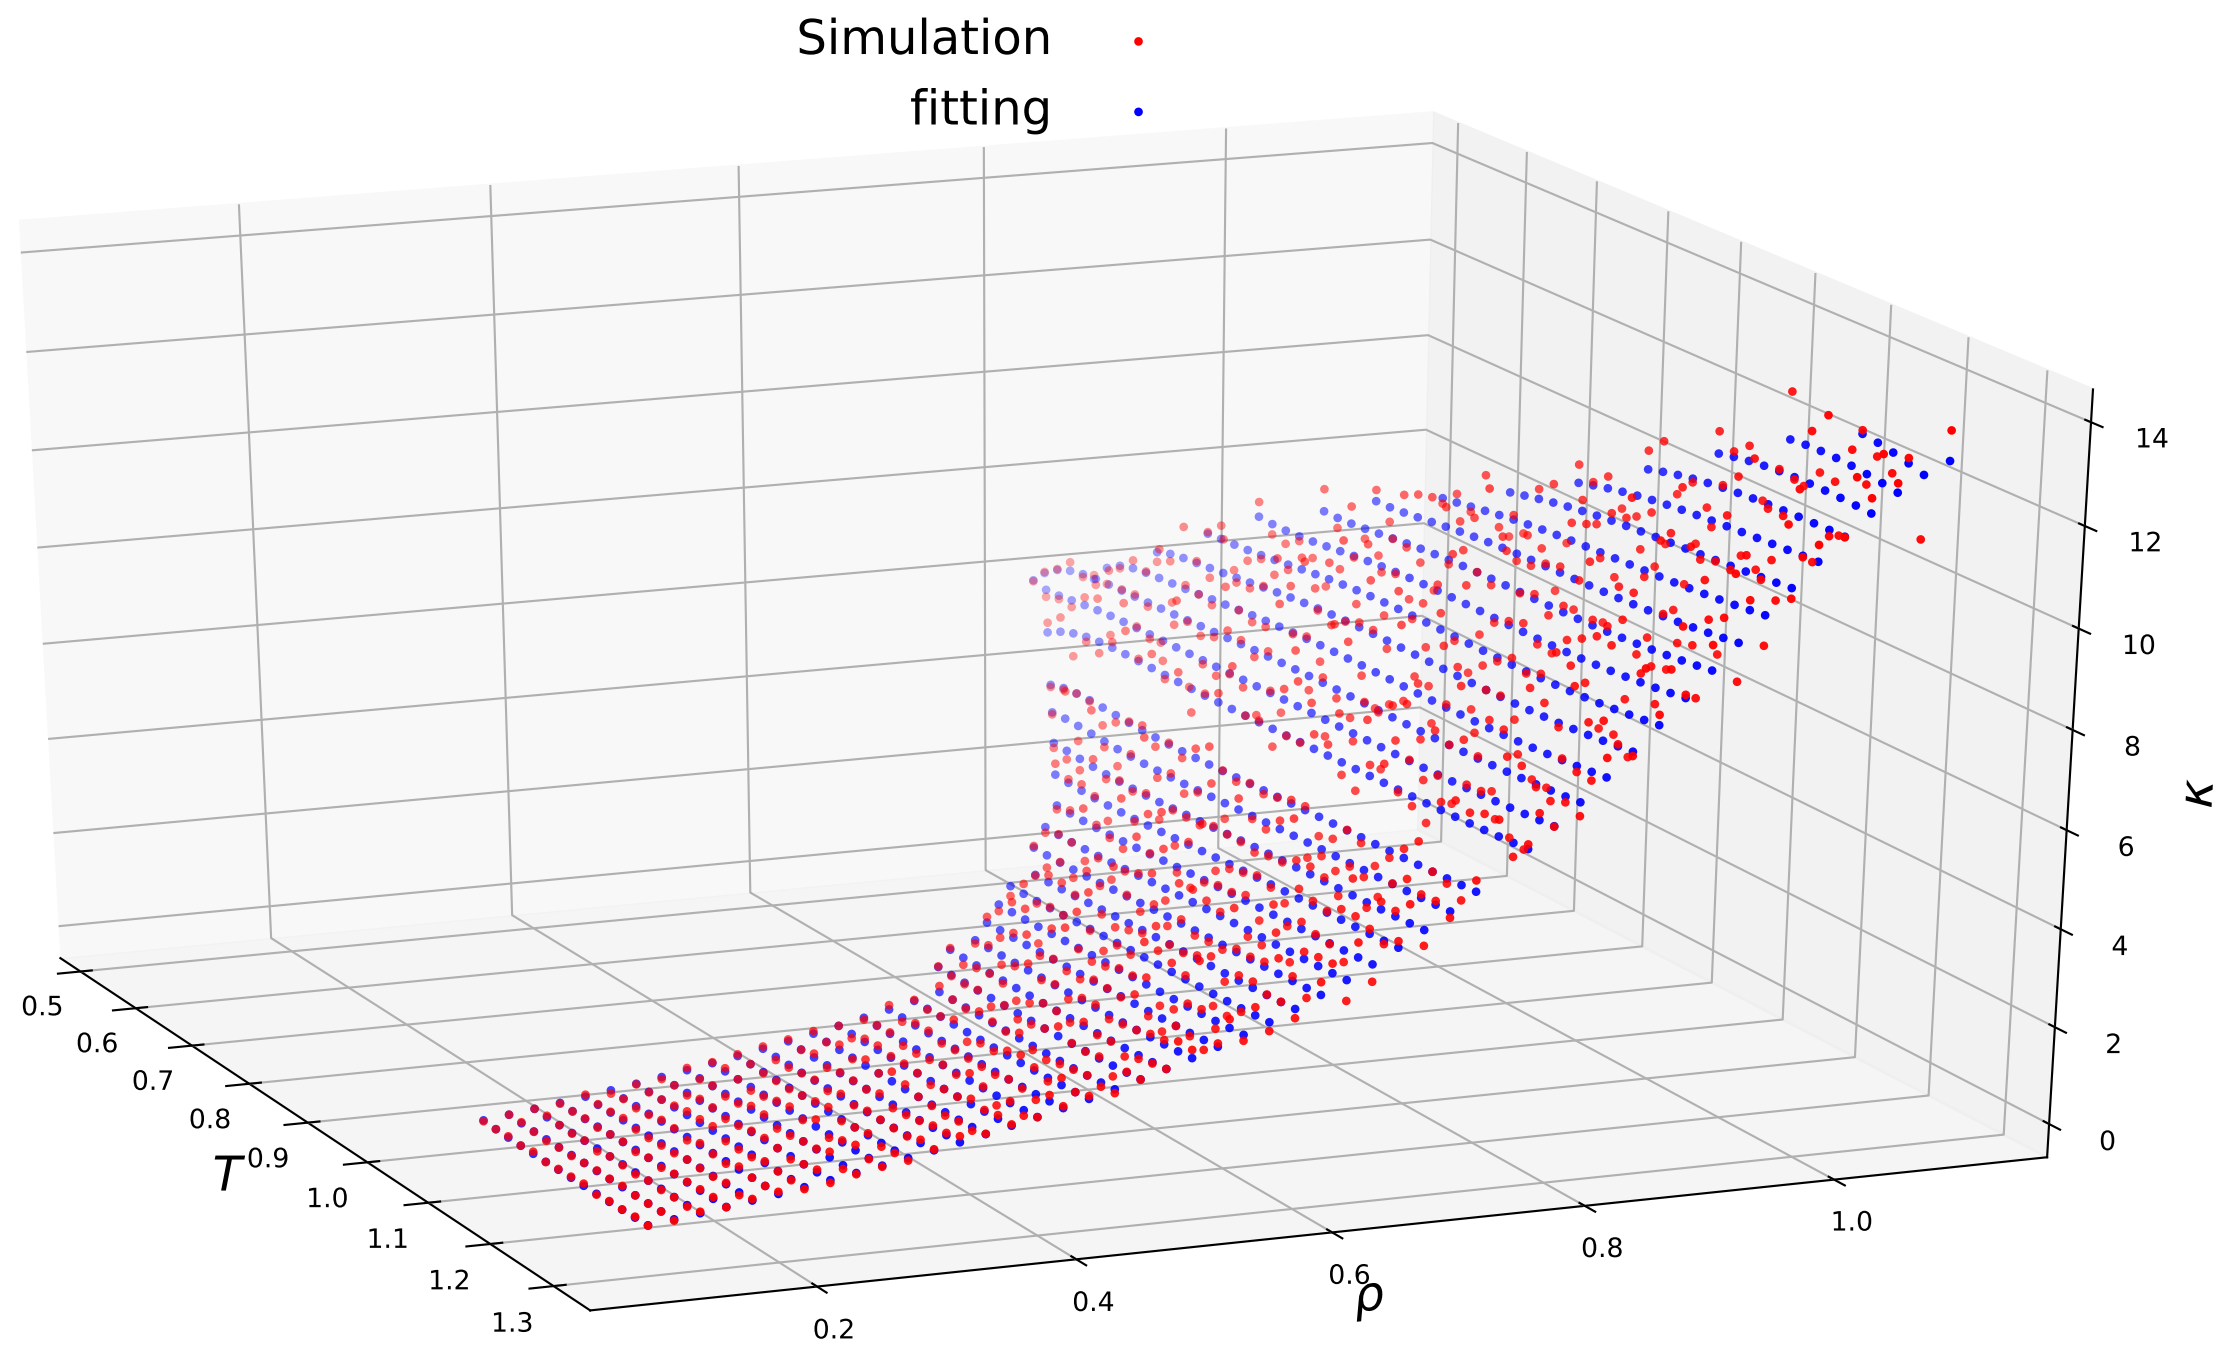

Supplement: c9cp05445f2.zip [file c9cp05445f2.zip]

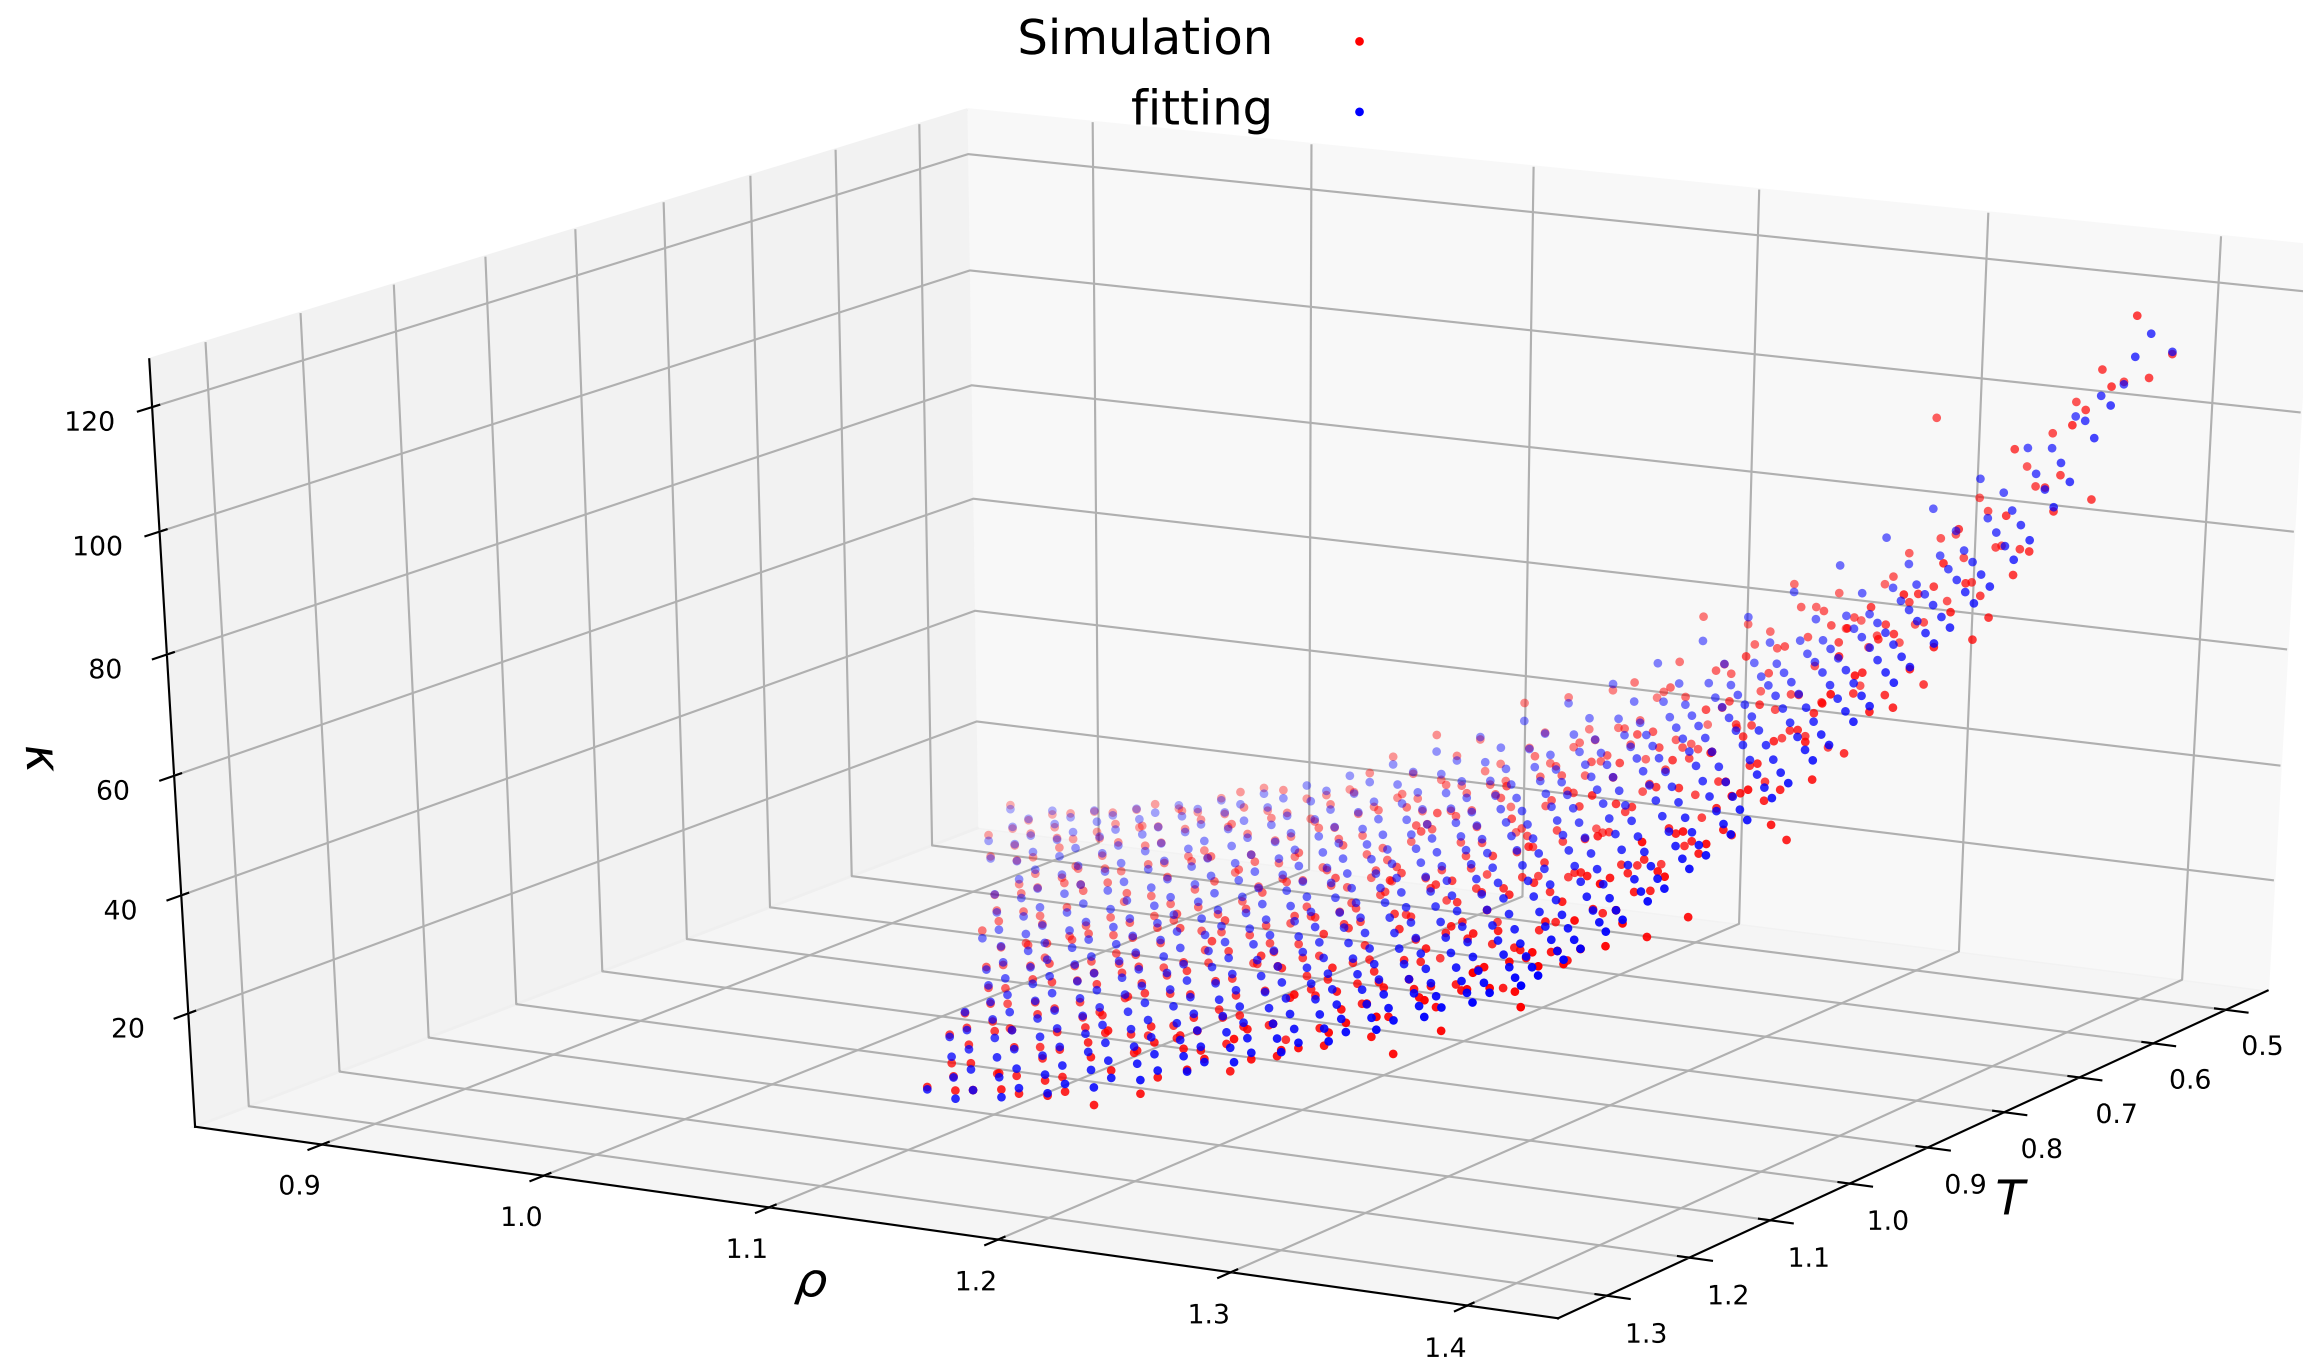

Supplement: c9cp05445f2.zip [file c9cp05445f2.zip]

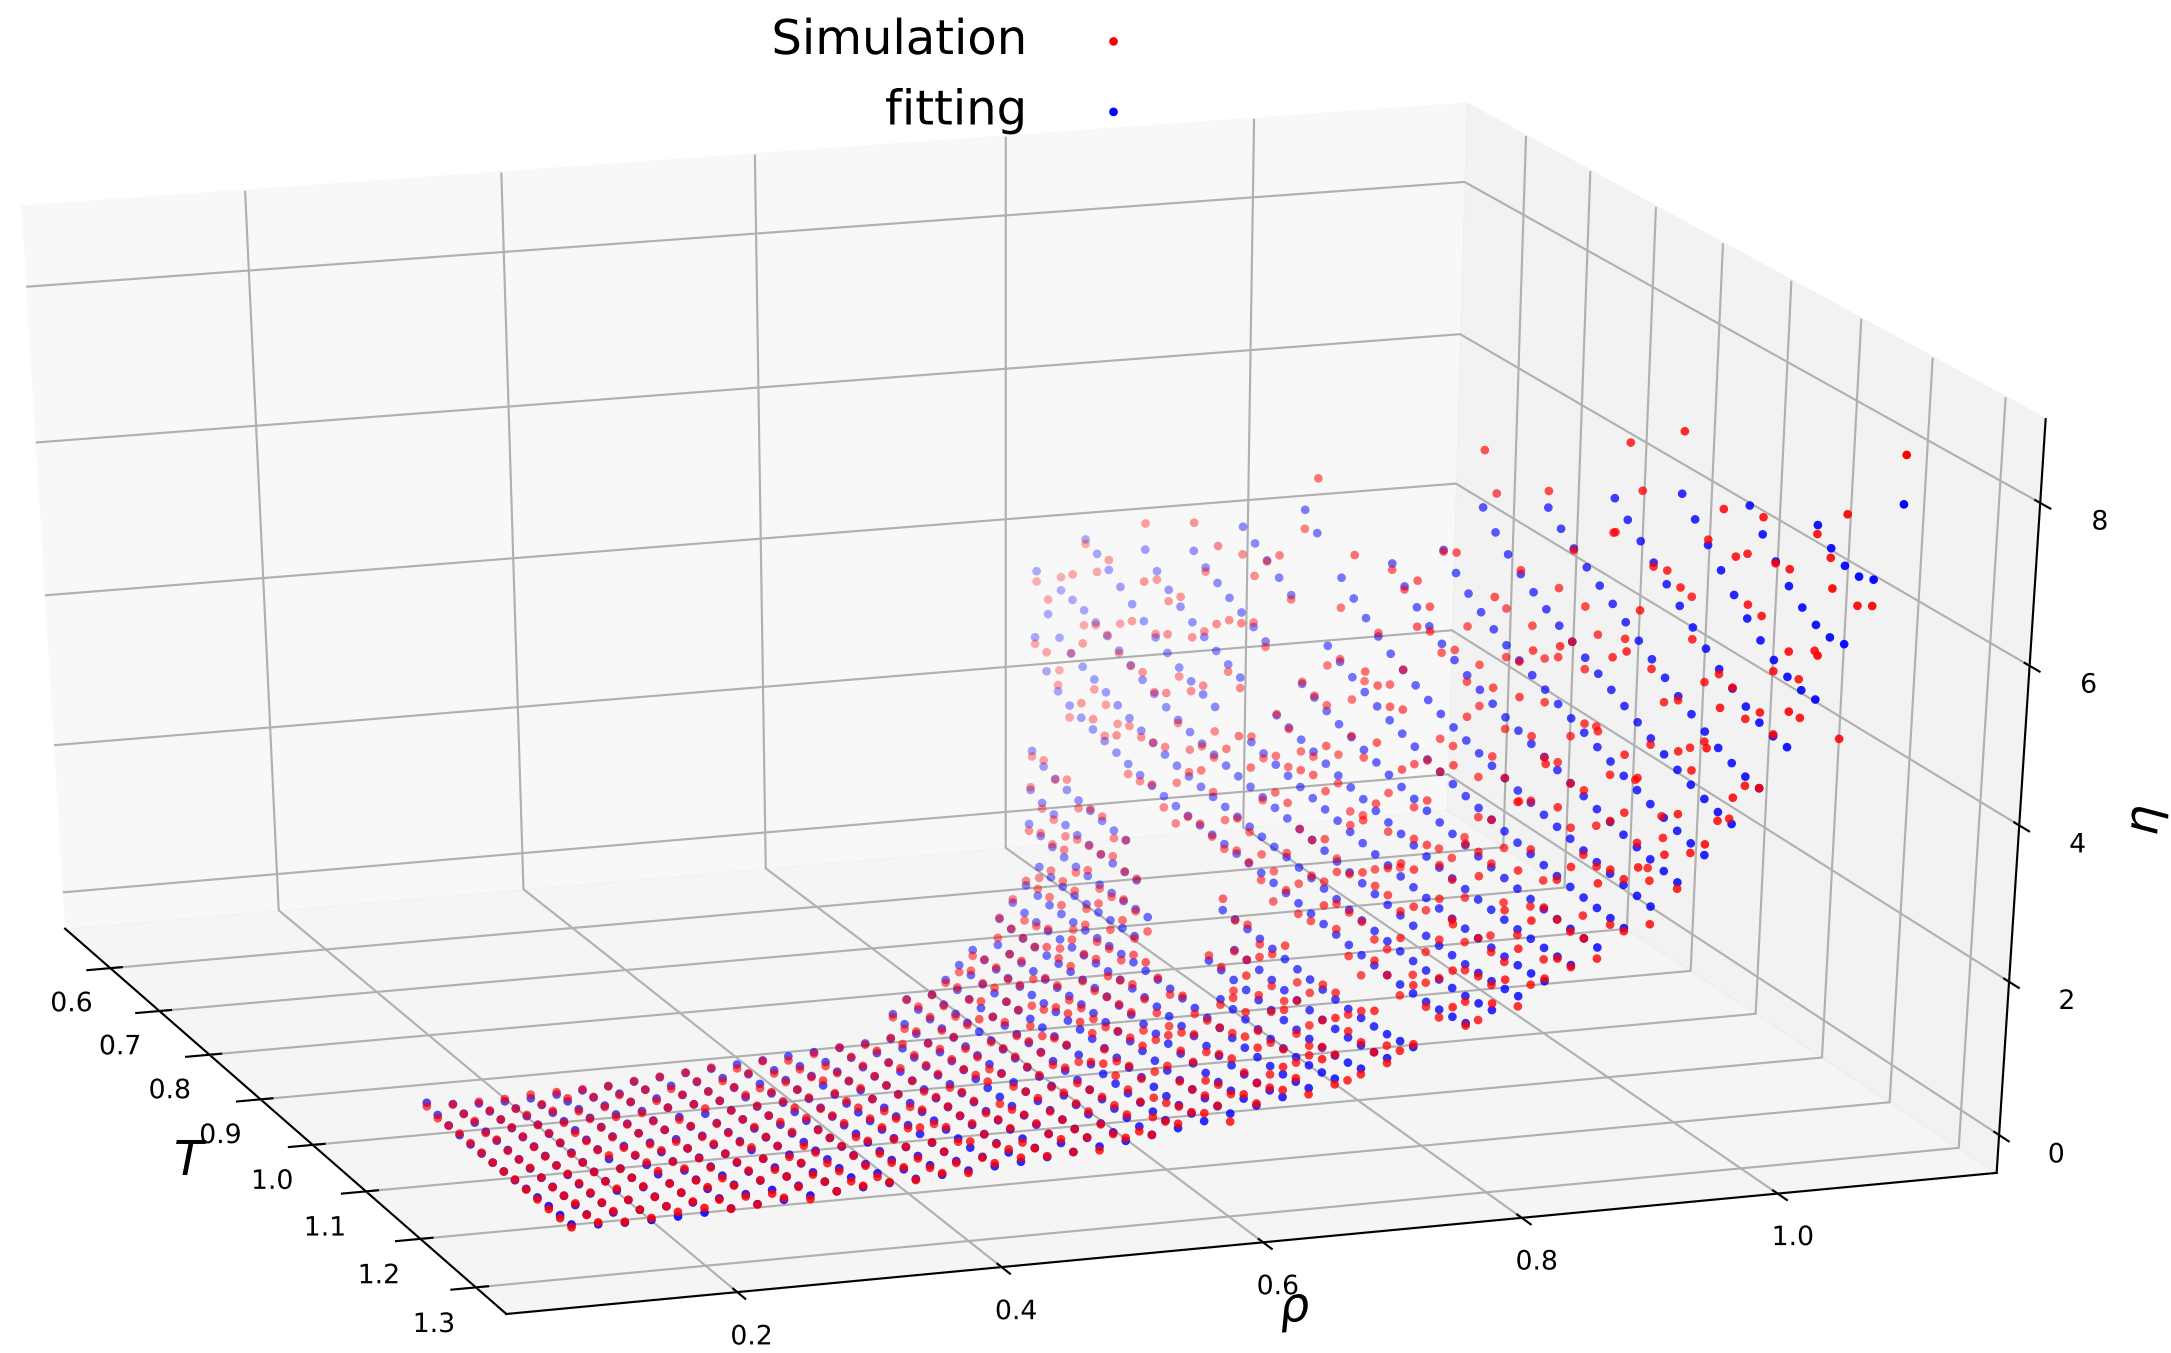

Supplement: c9cp05445f2.zip [file c9cp05445f2.zip]

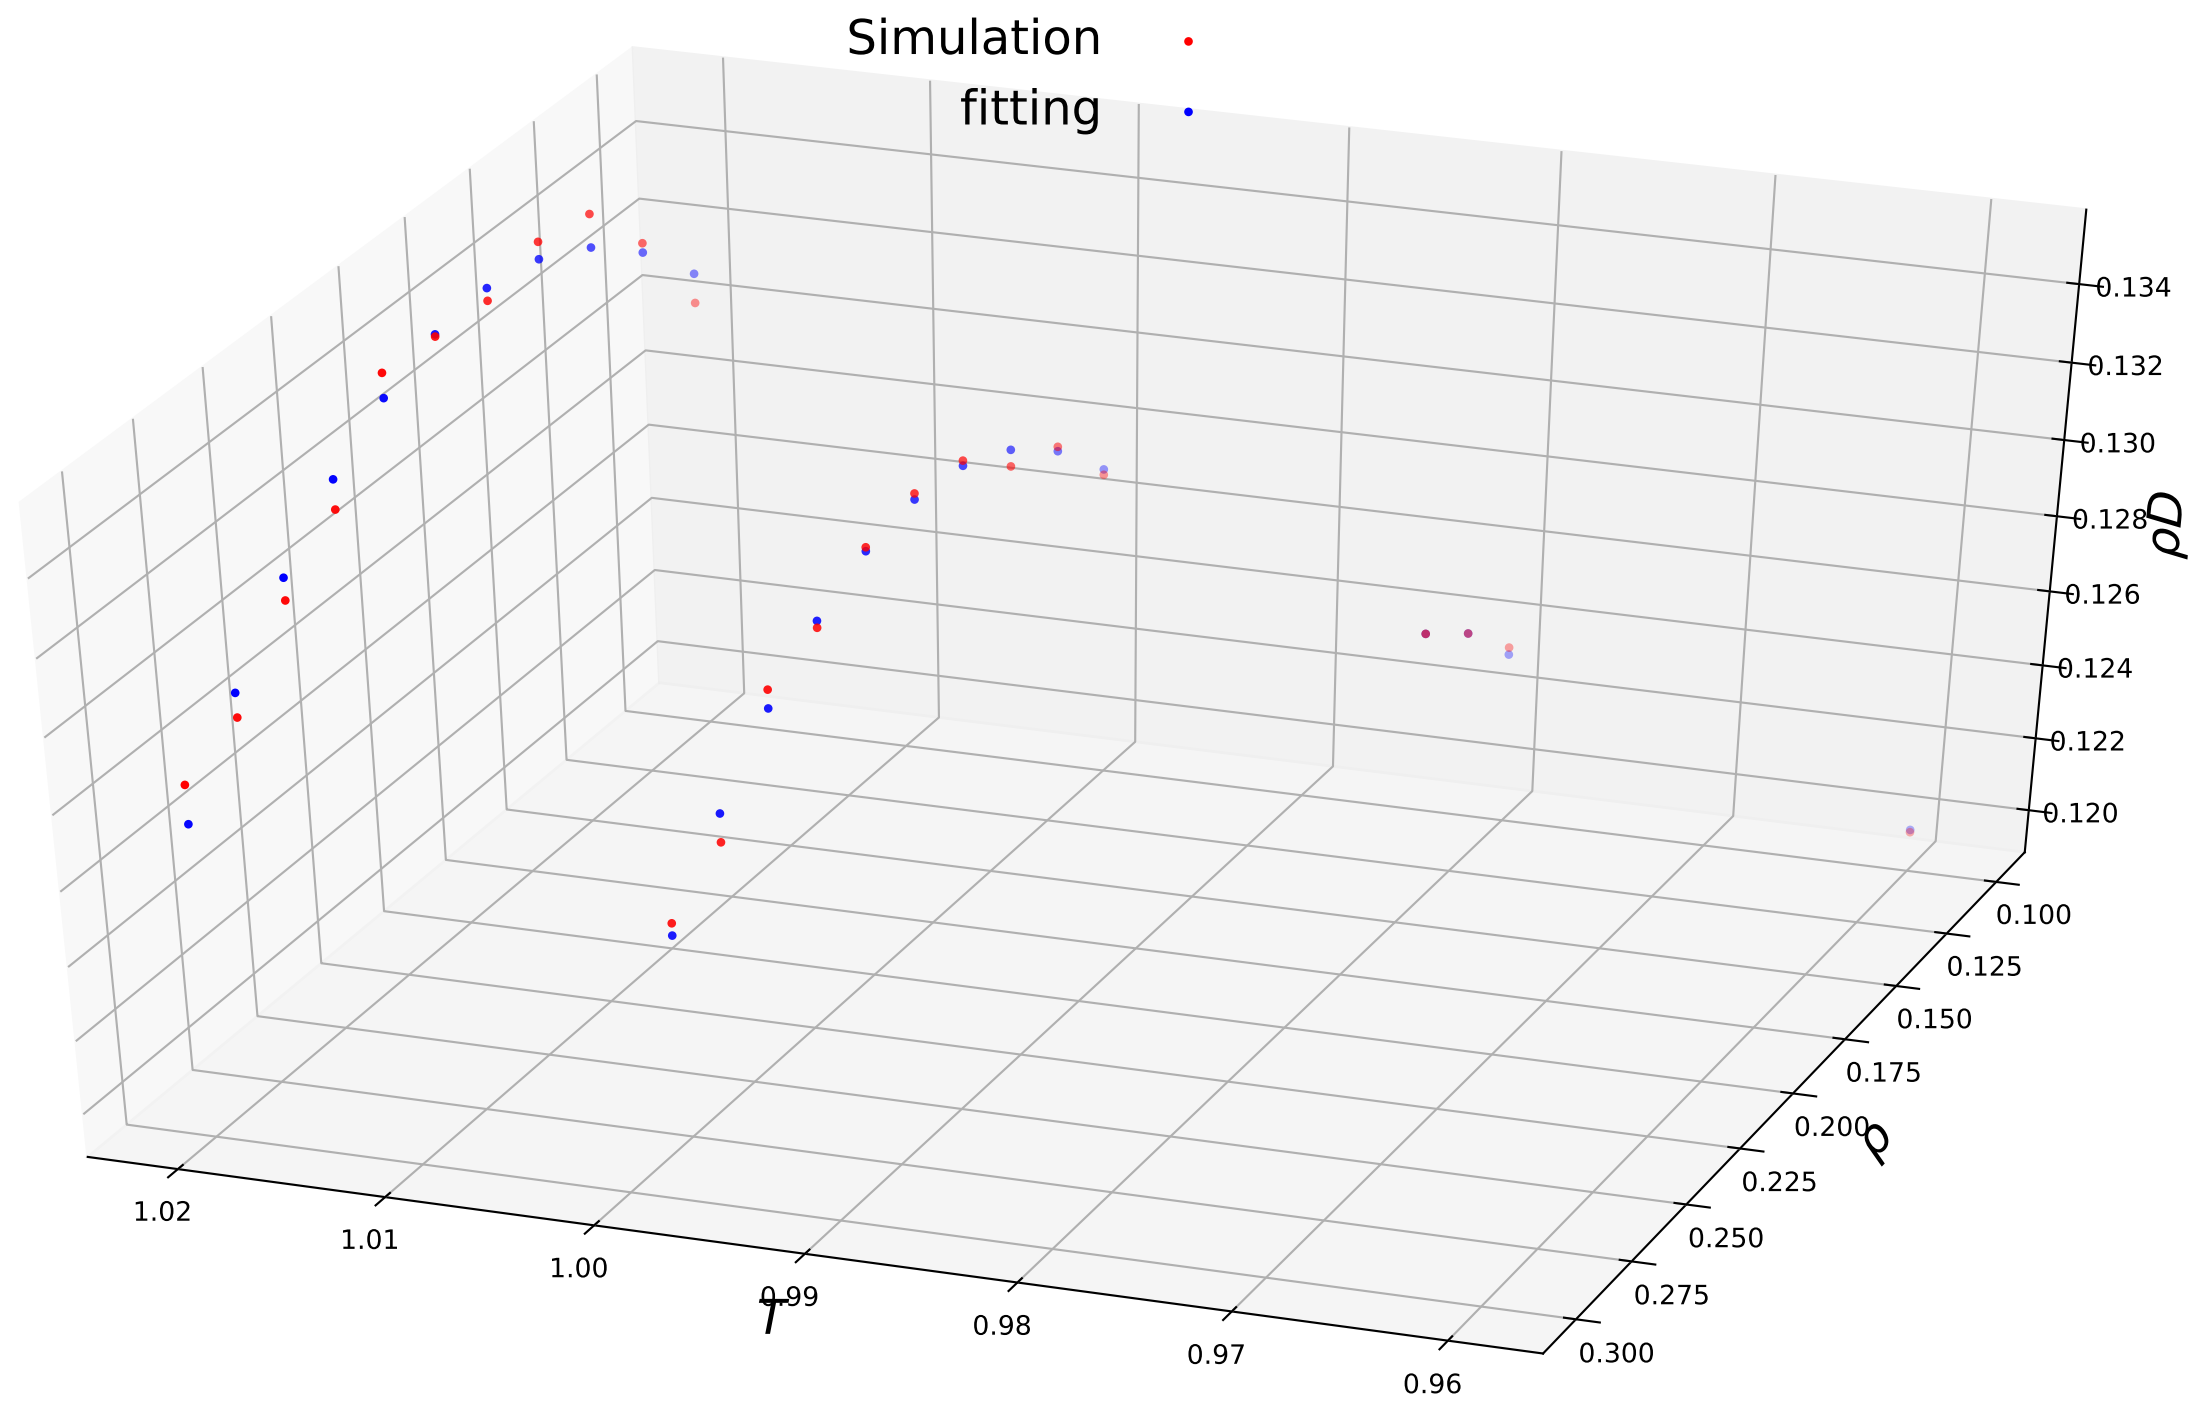

Supplement: c9cp05445f2.zip [file c9cp05445f2.zip]

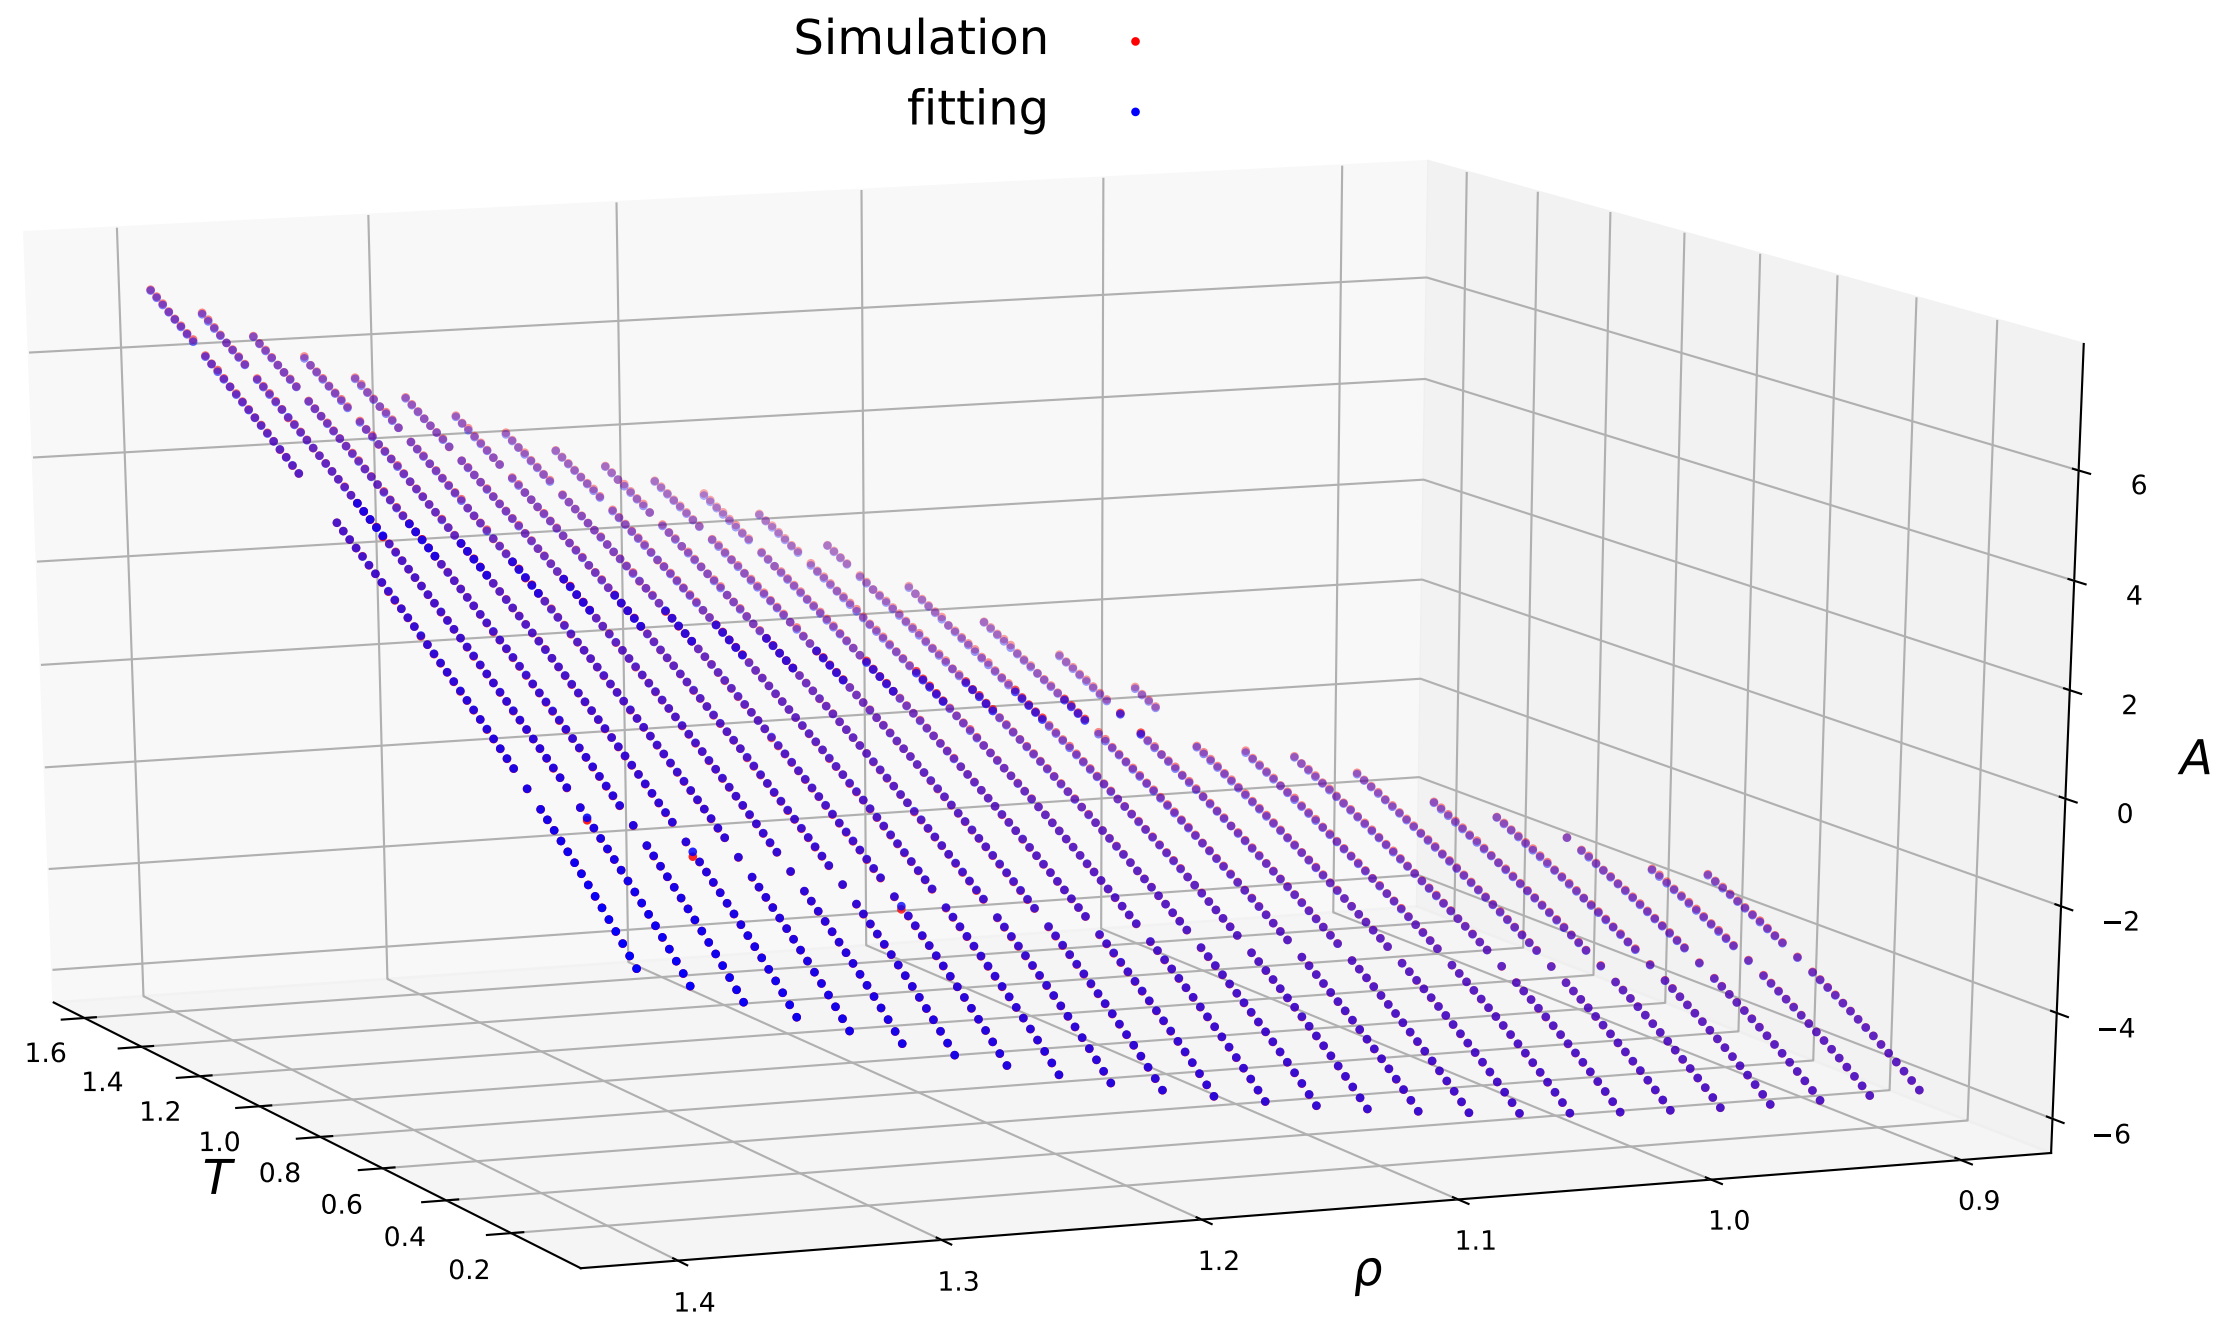

Supplement: c9cp05445f2.zip [file c9cp05445f2.zip]

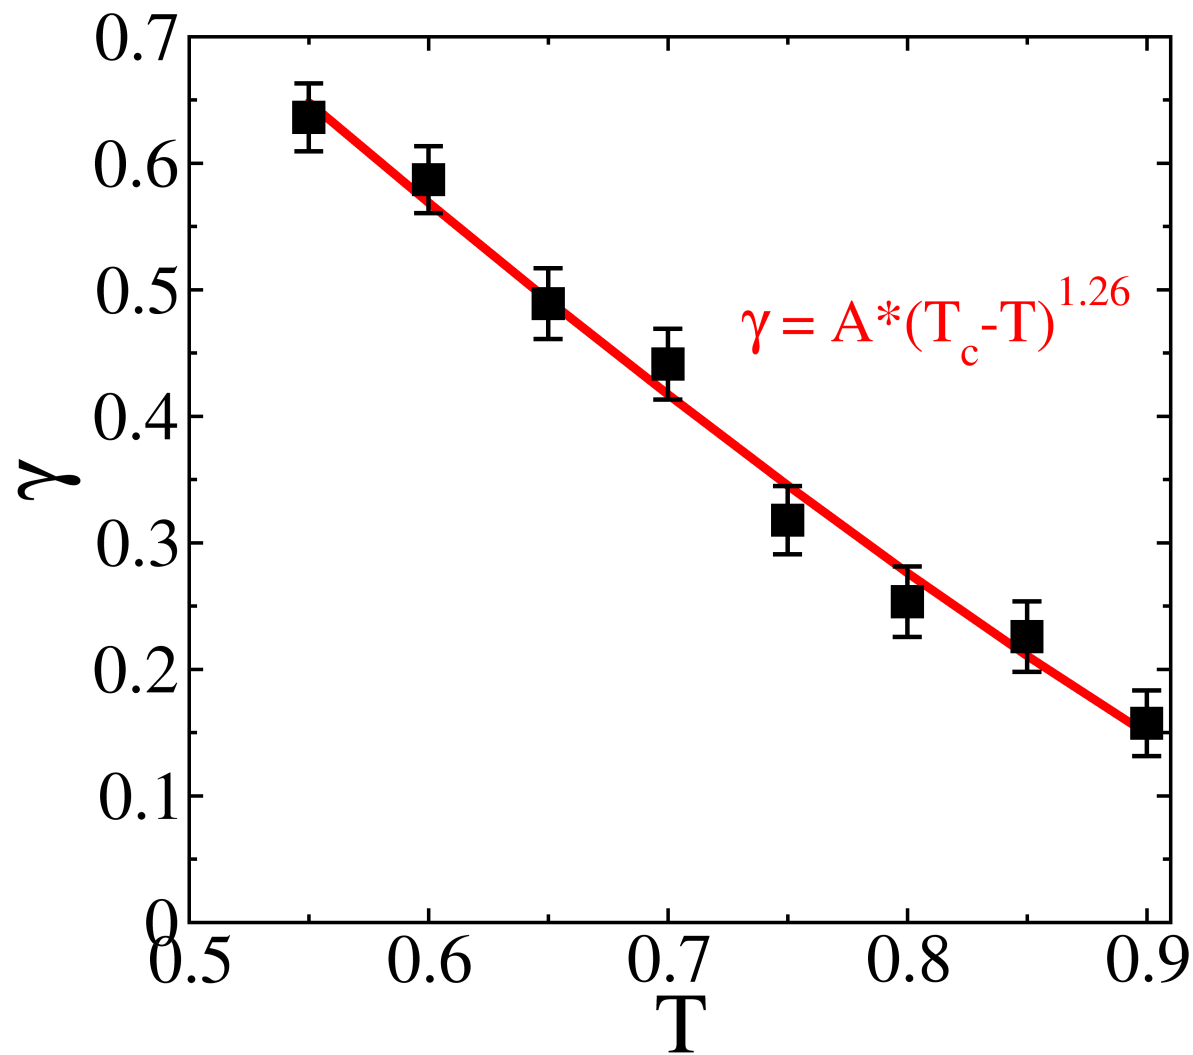

Supplement: c9cp05445f2.zip [file c9cp05445f2.zip]

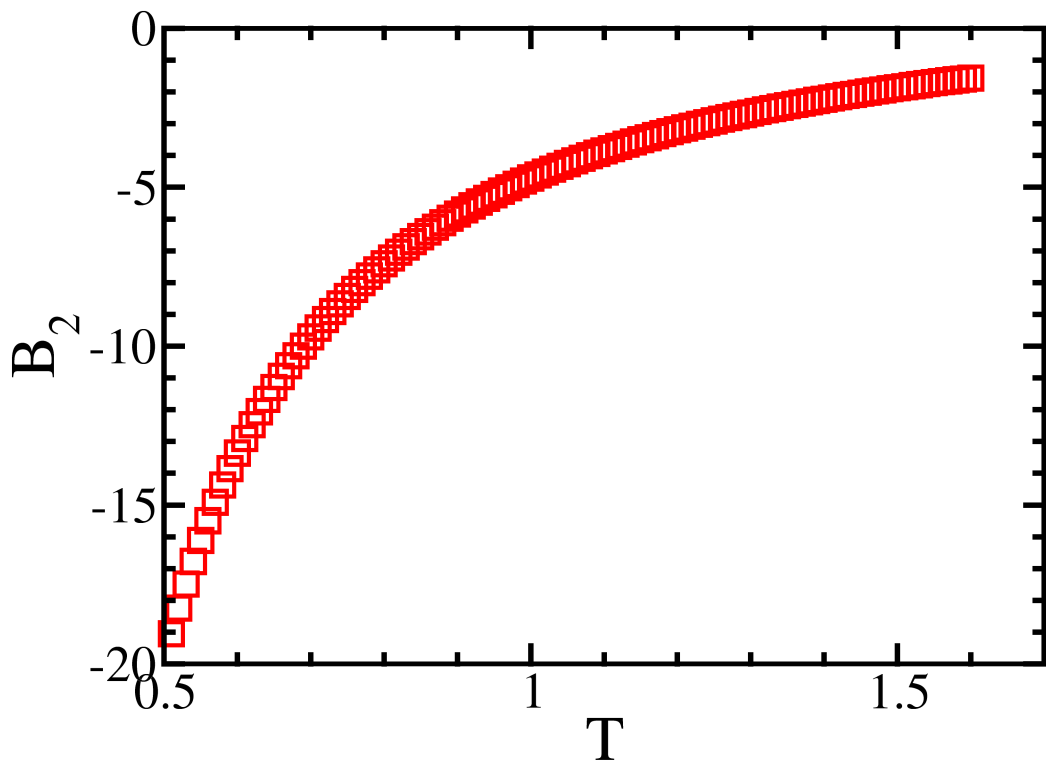

Supplement: c9cp05445f2.zip [file c9cp05445f2.zip]

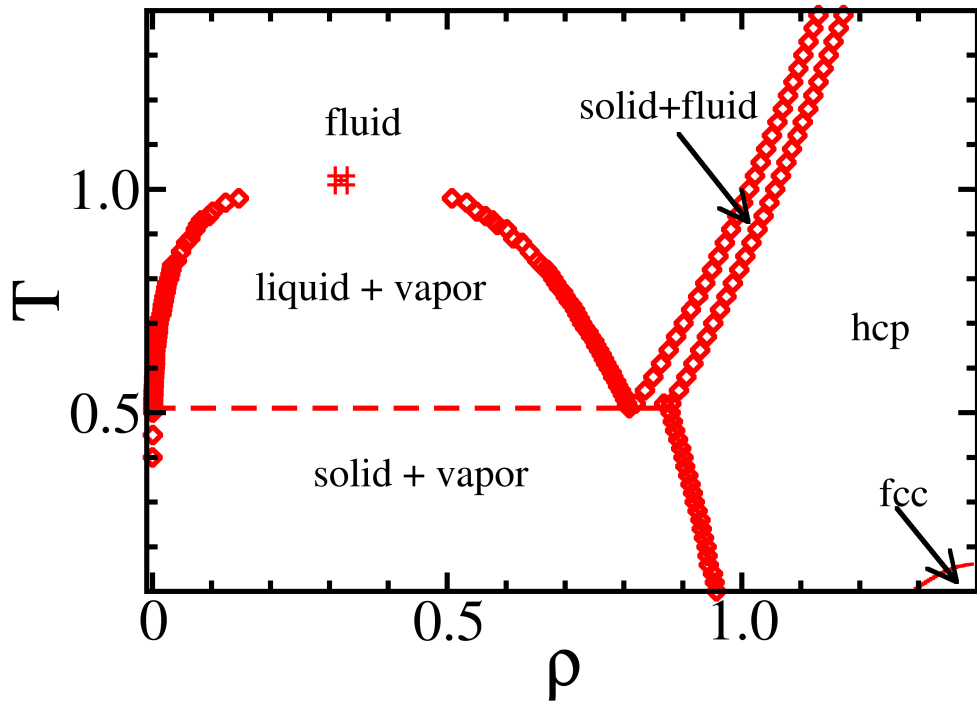

Supplement: c9cp05445f2.zip [file c9cp05445f2.zip]

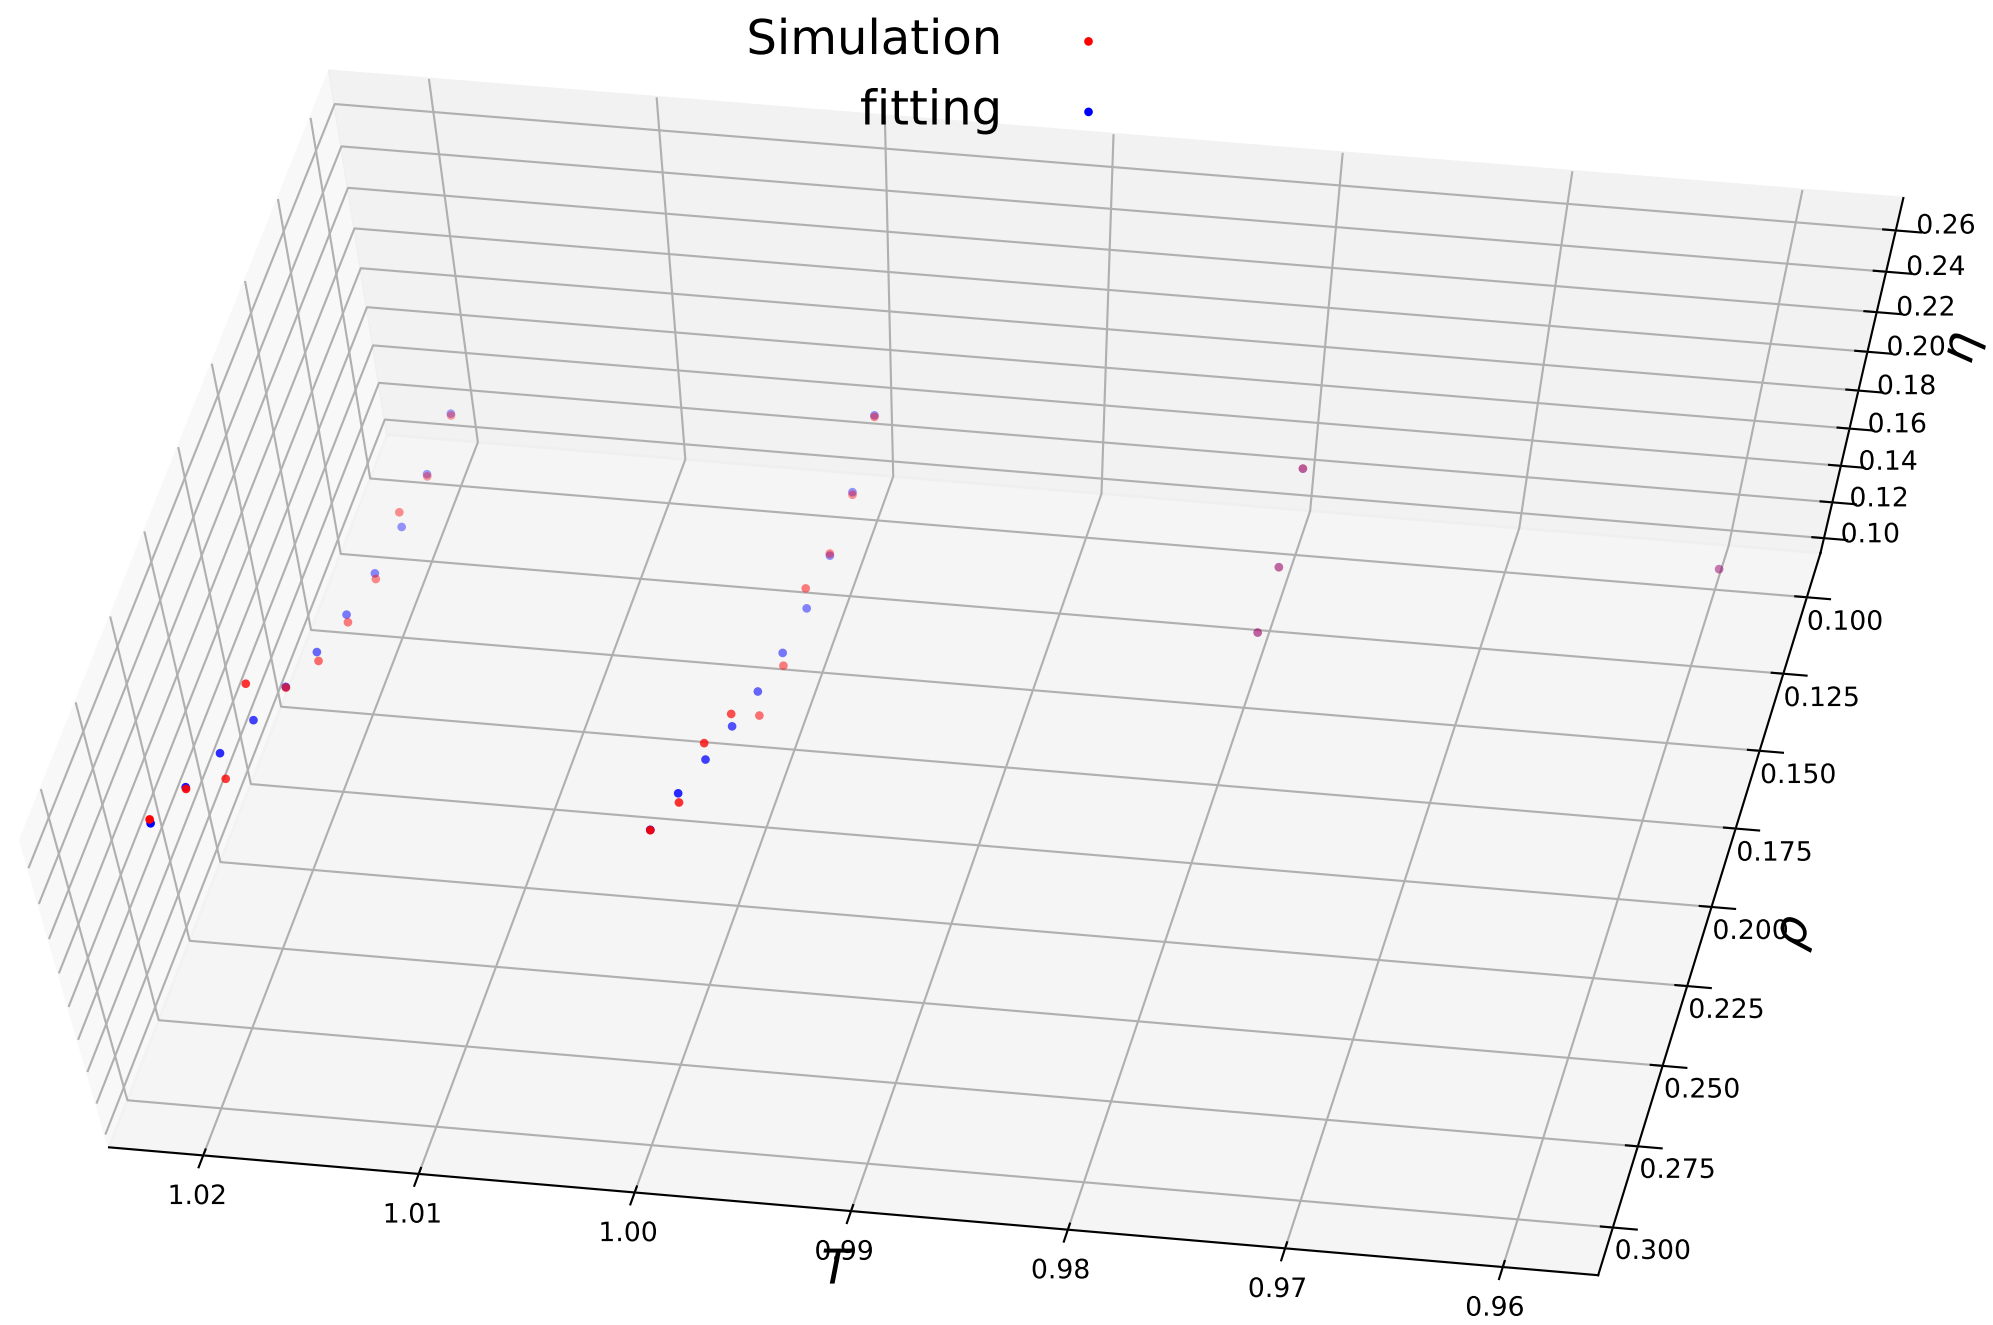

Supplement: c9cp05445f2.zip [file c9cp05445f2.zip]

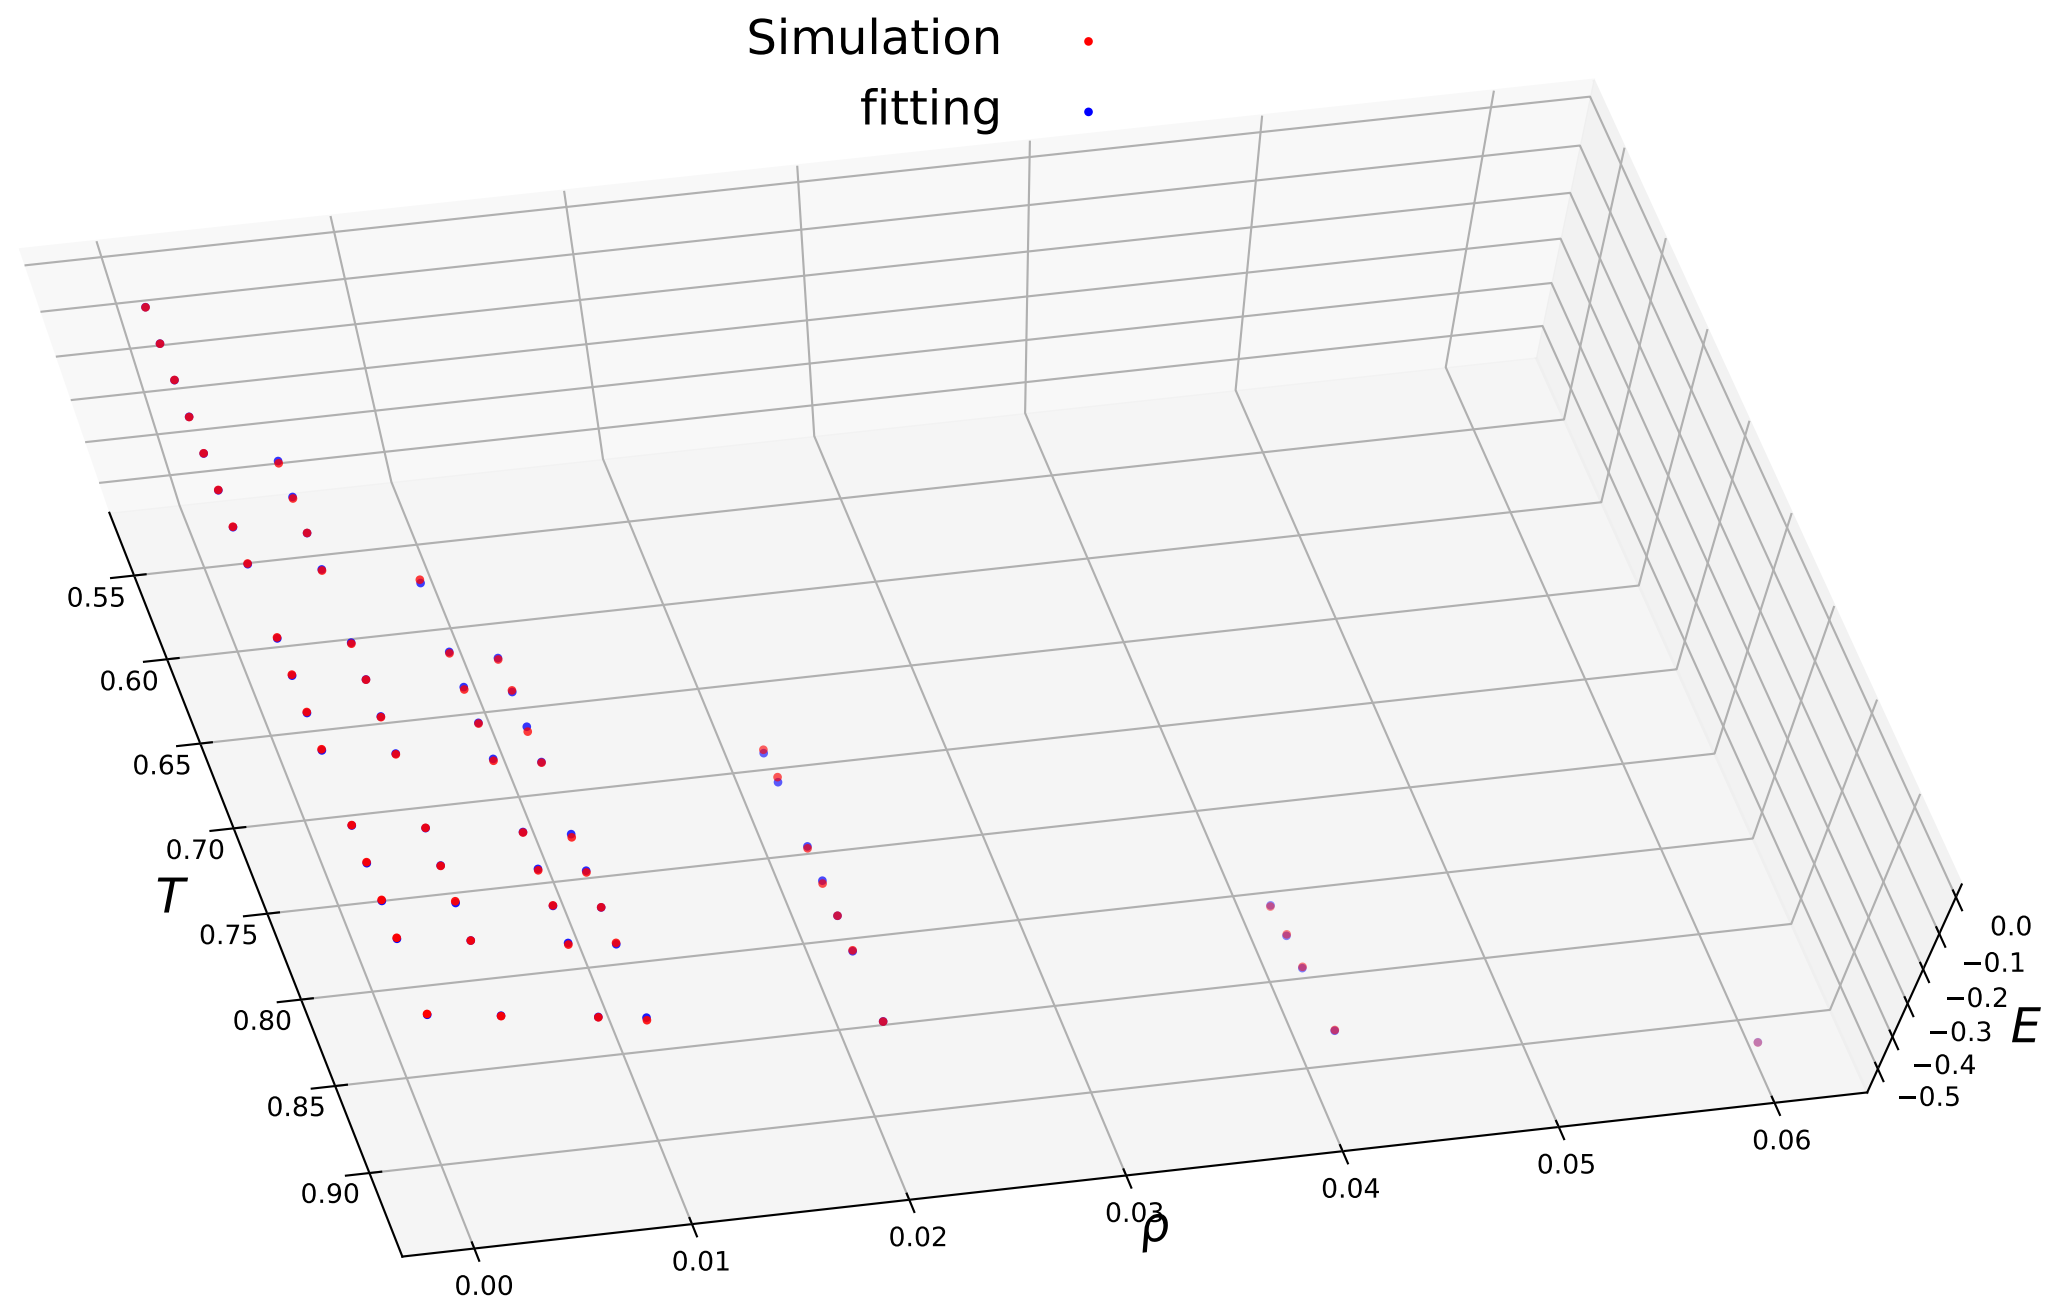

Supplement: c9cp05445f2.zip [file c9cp05445f2.zip]

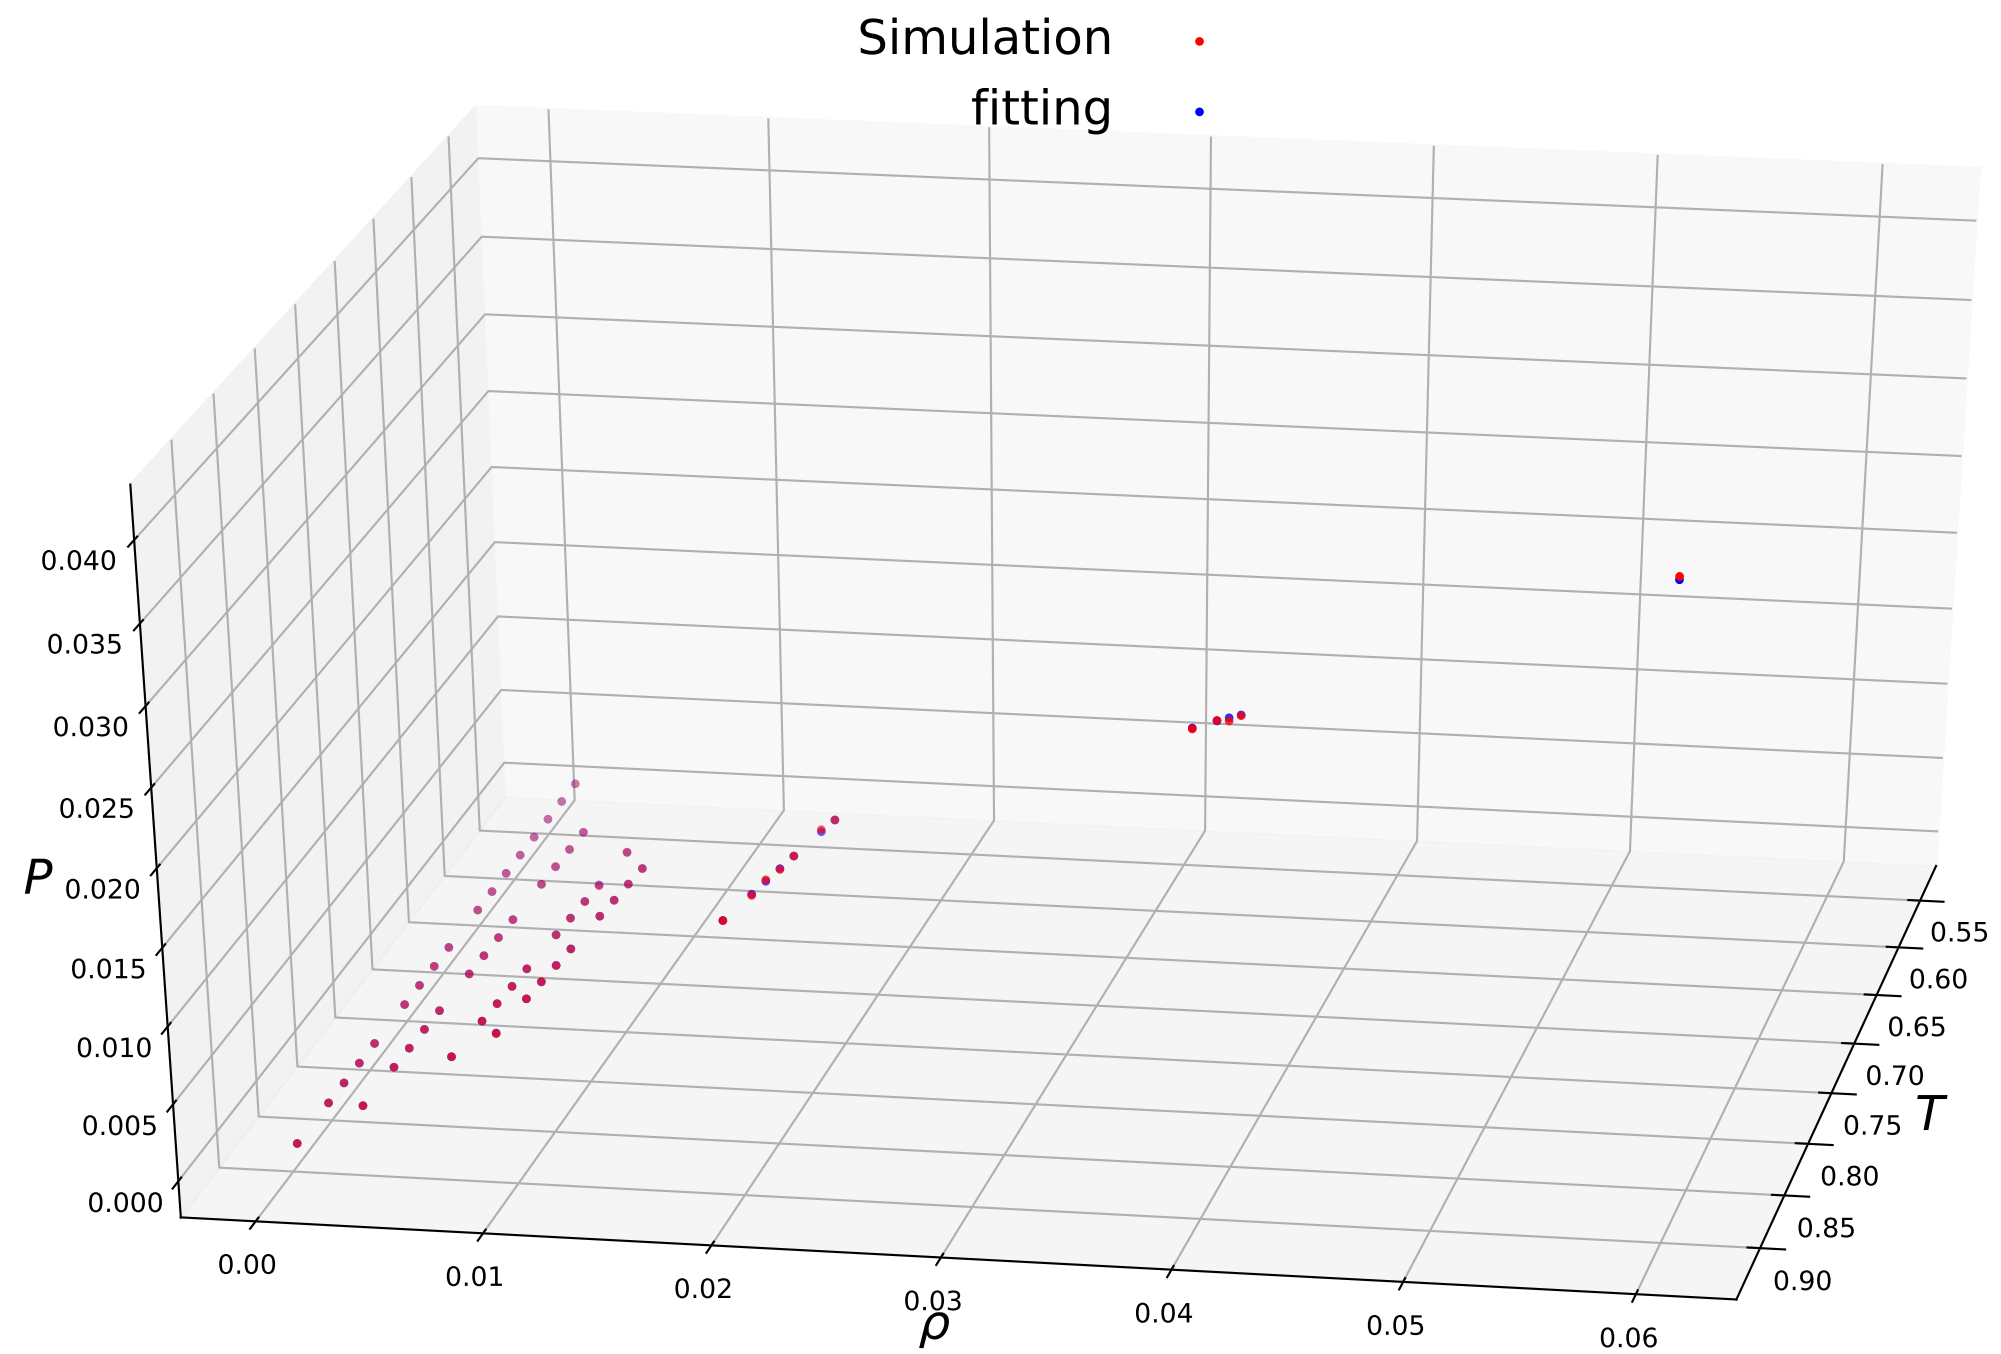

Supplement: c9cp05445f2.zip [file c9cp05445f2.zip]

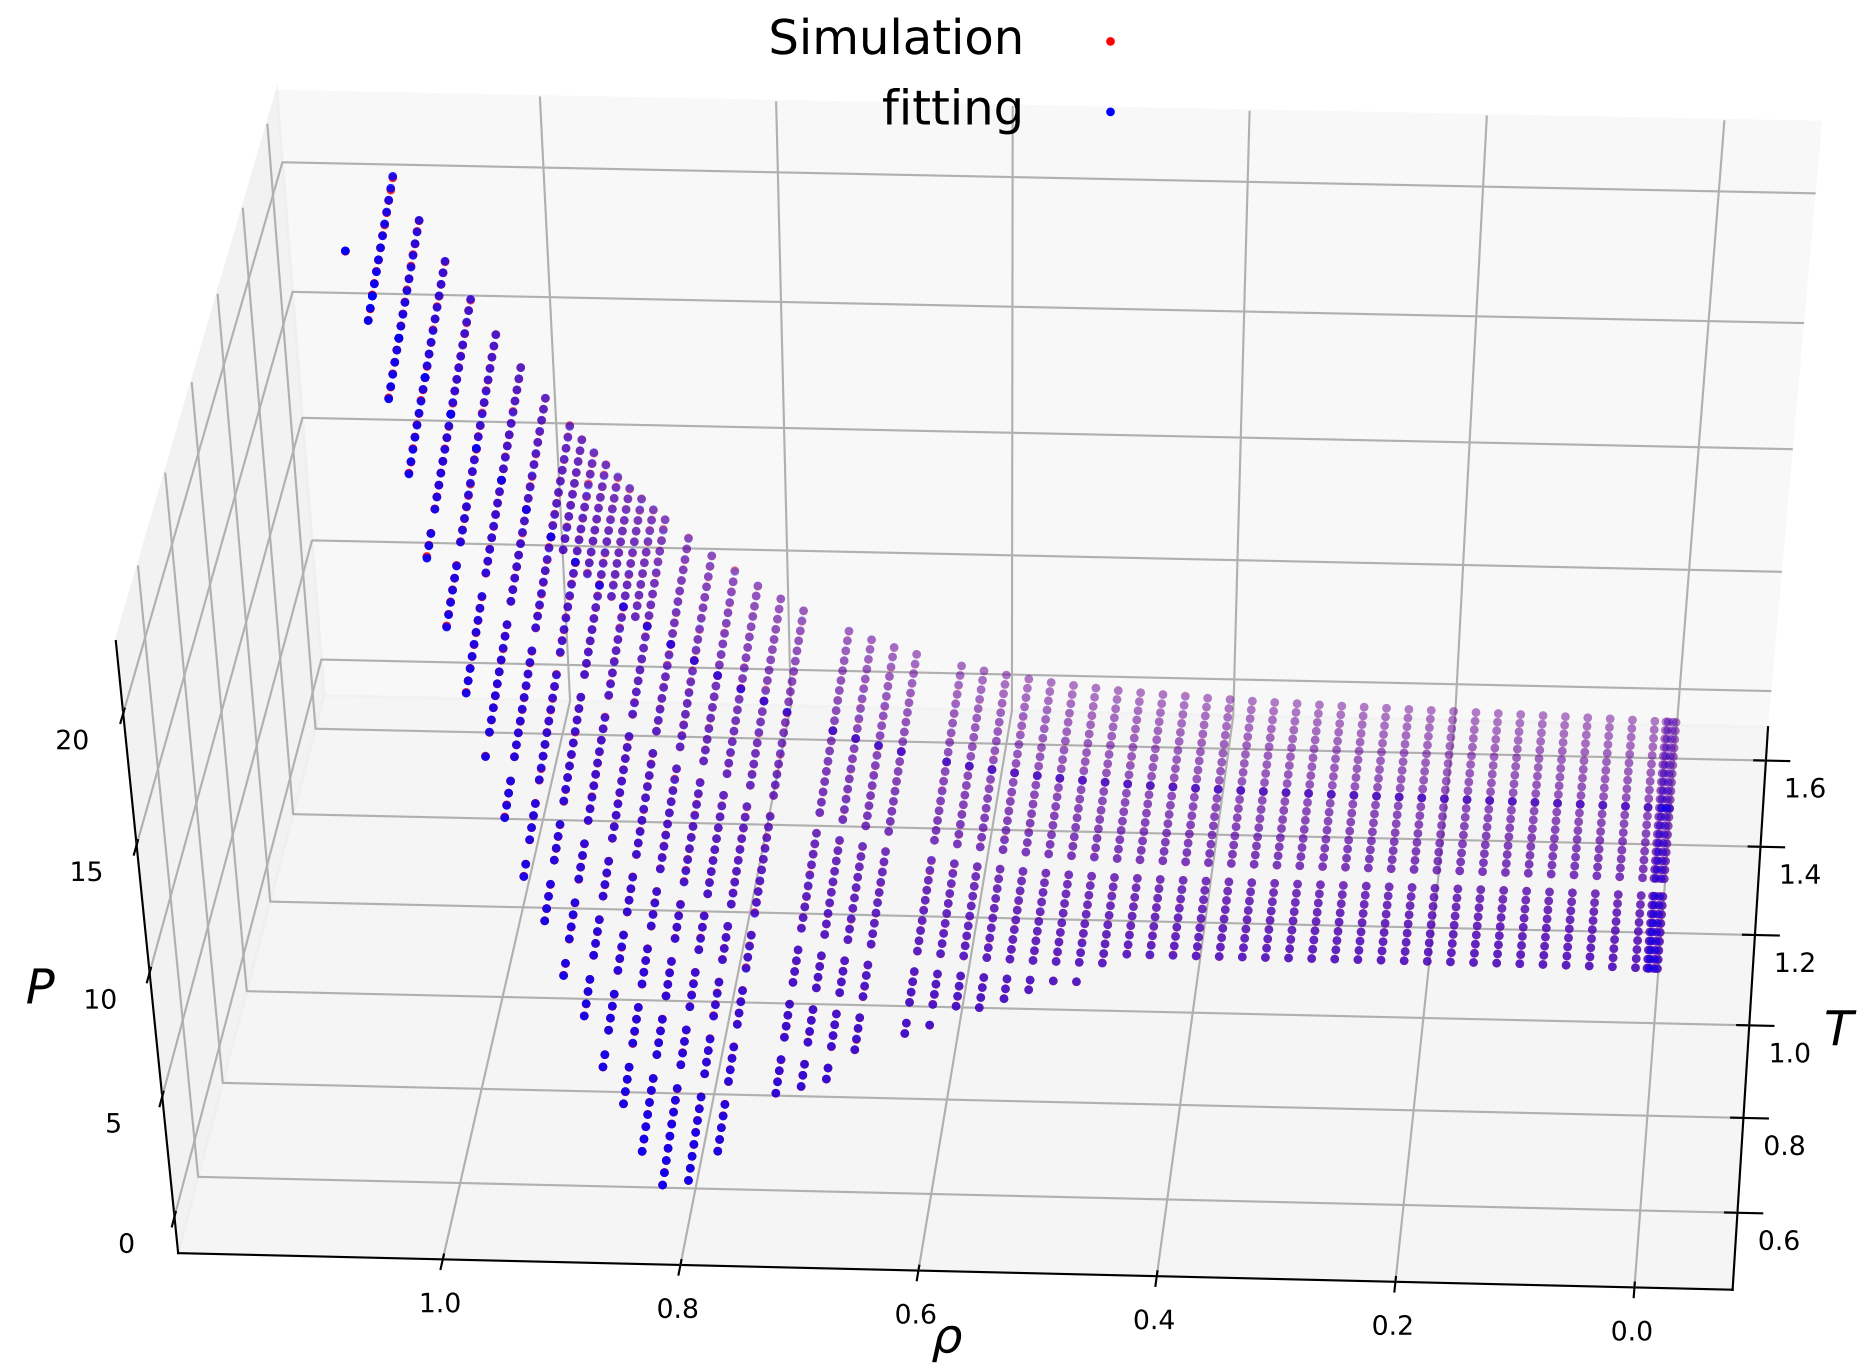

Supplement: c9cp05445f2.zip [file c9cp05445f2.zip]

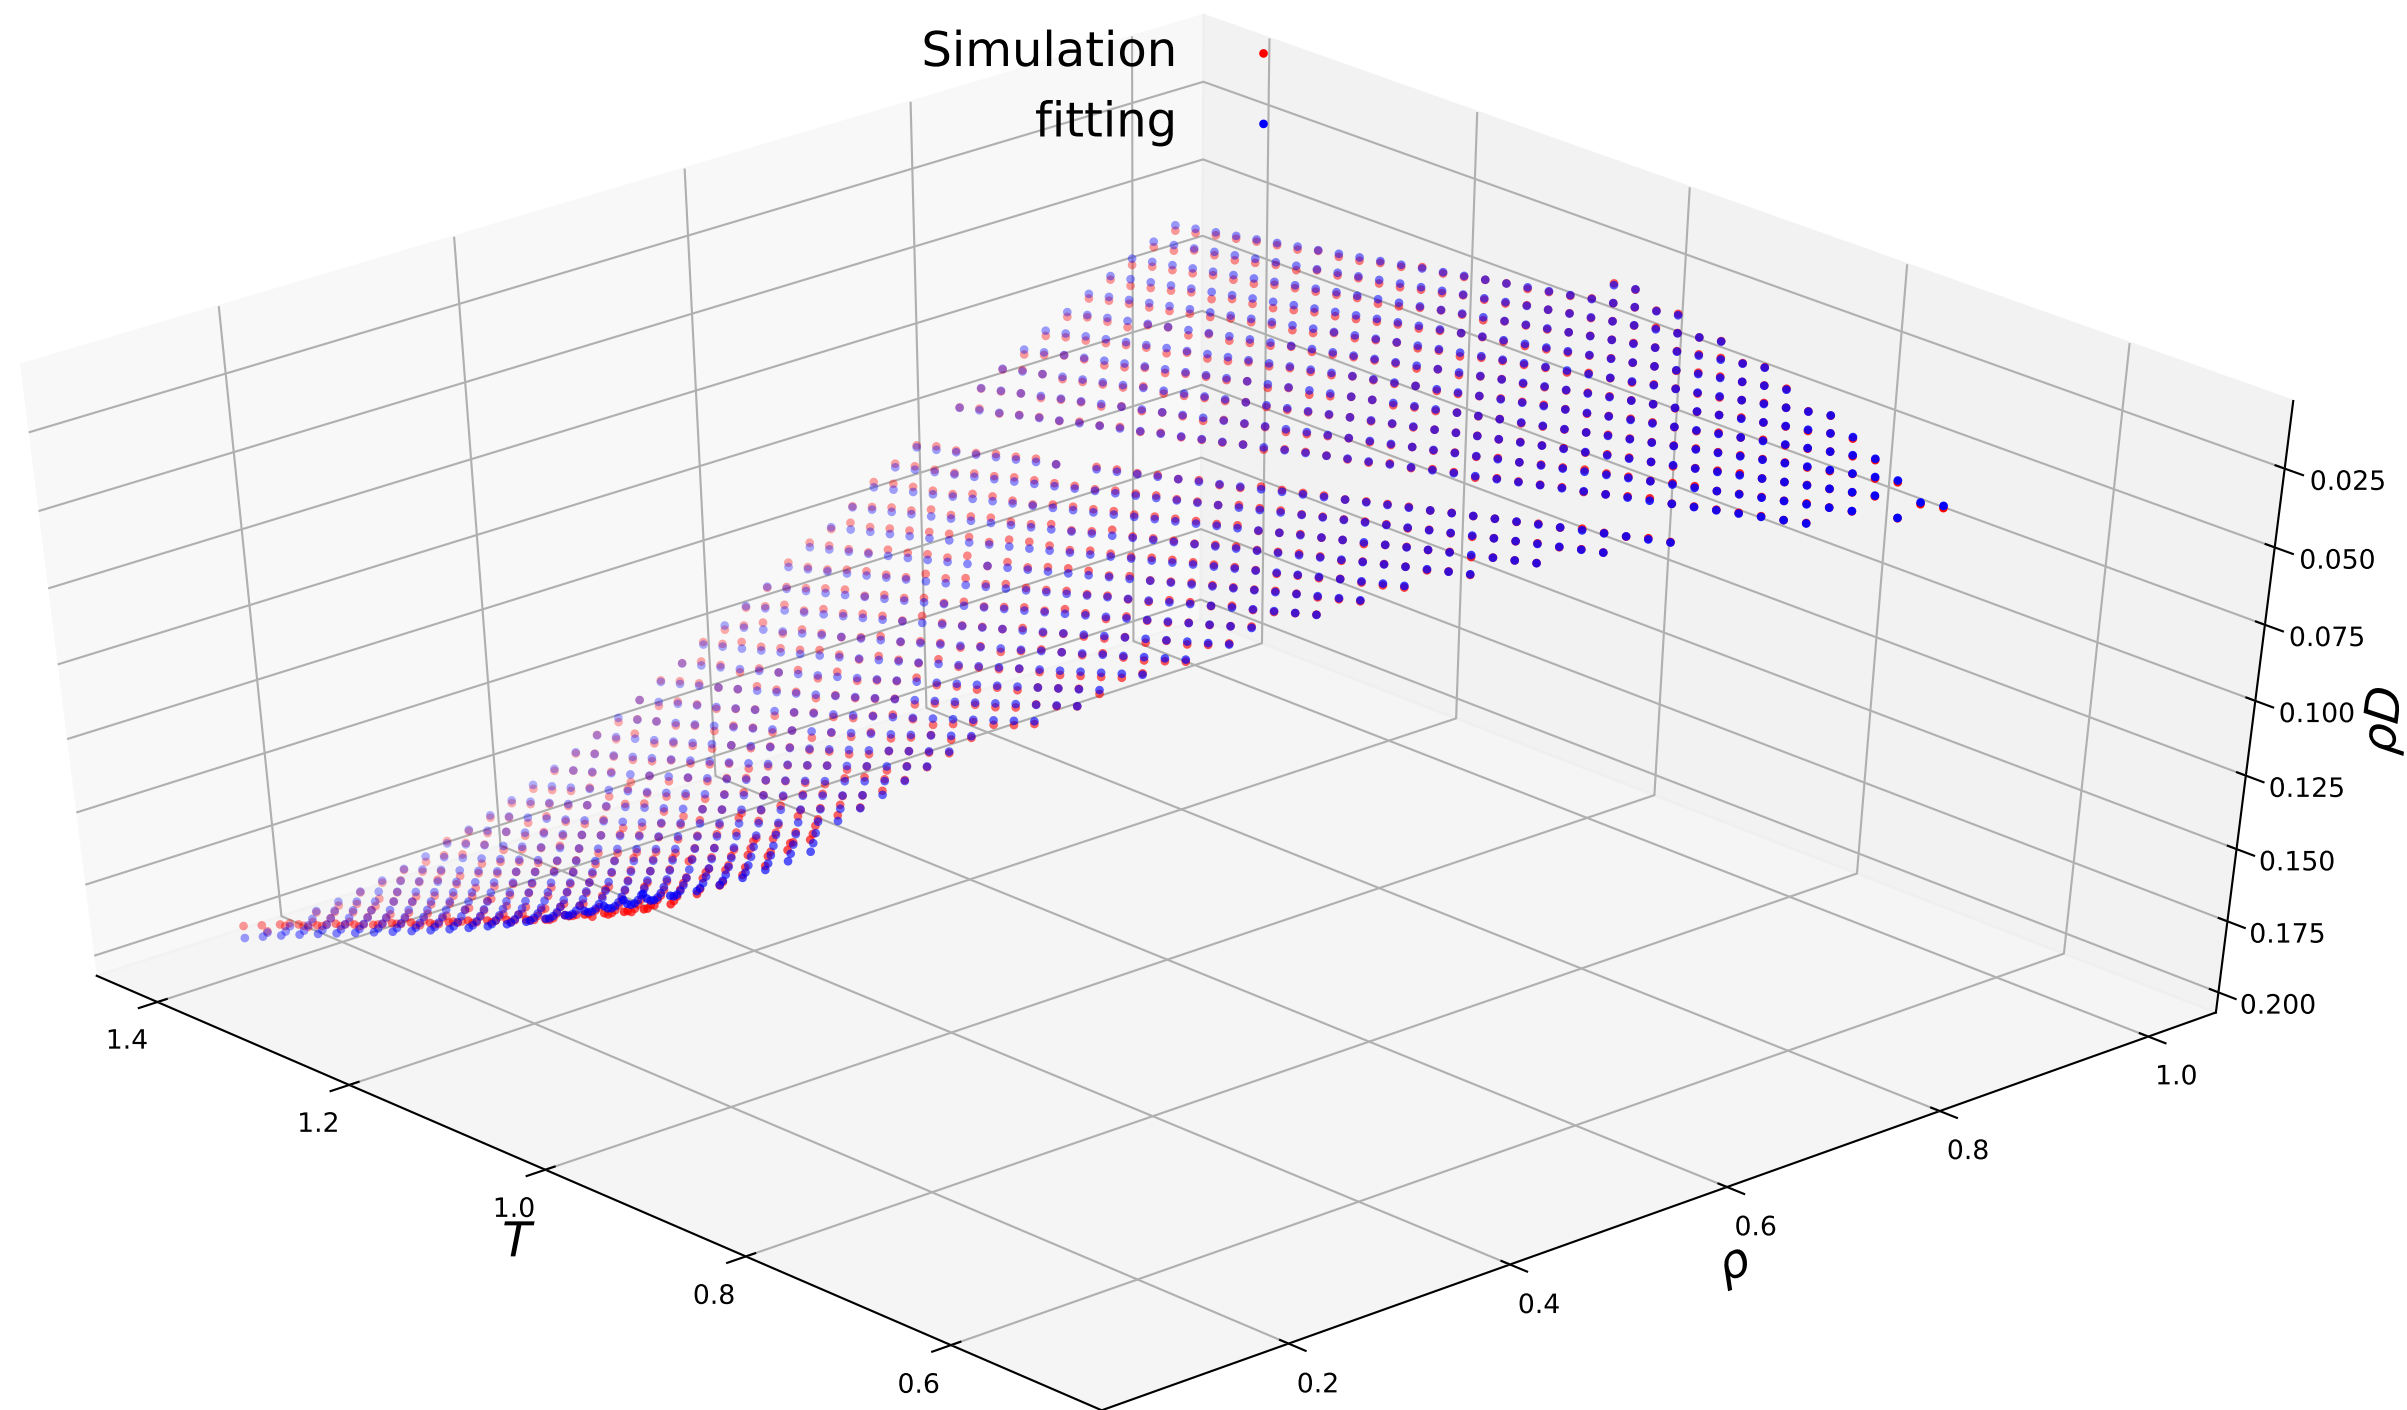

Supplement: c9cp05445f2.zip [file c9cp05445f2.zip]

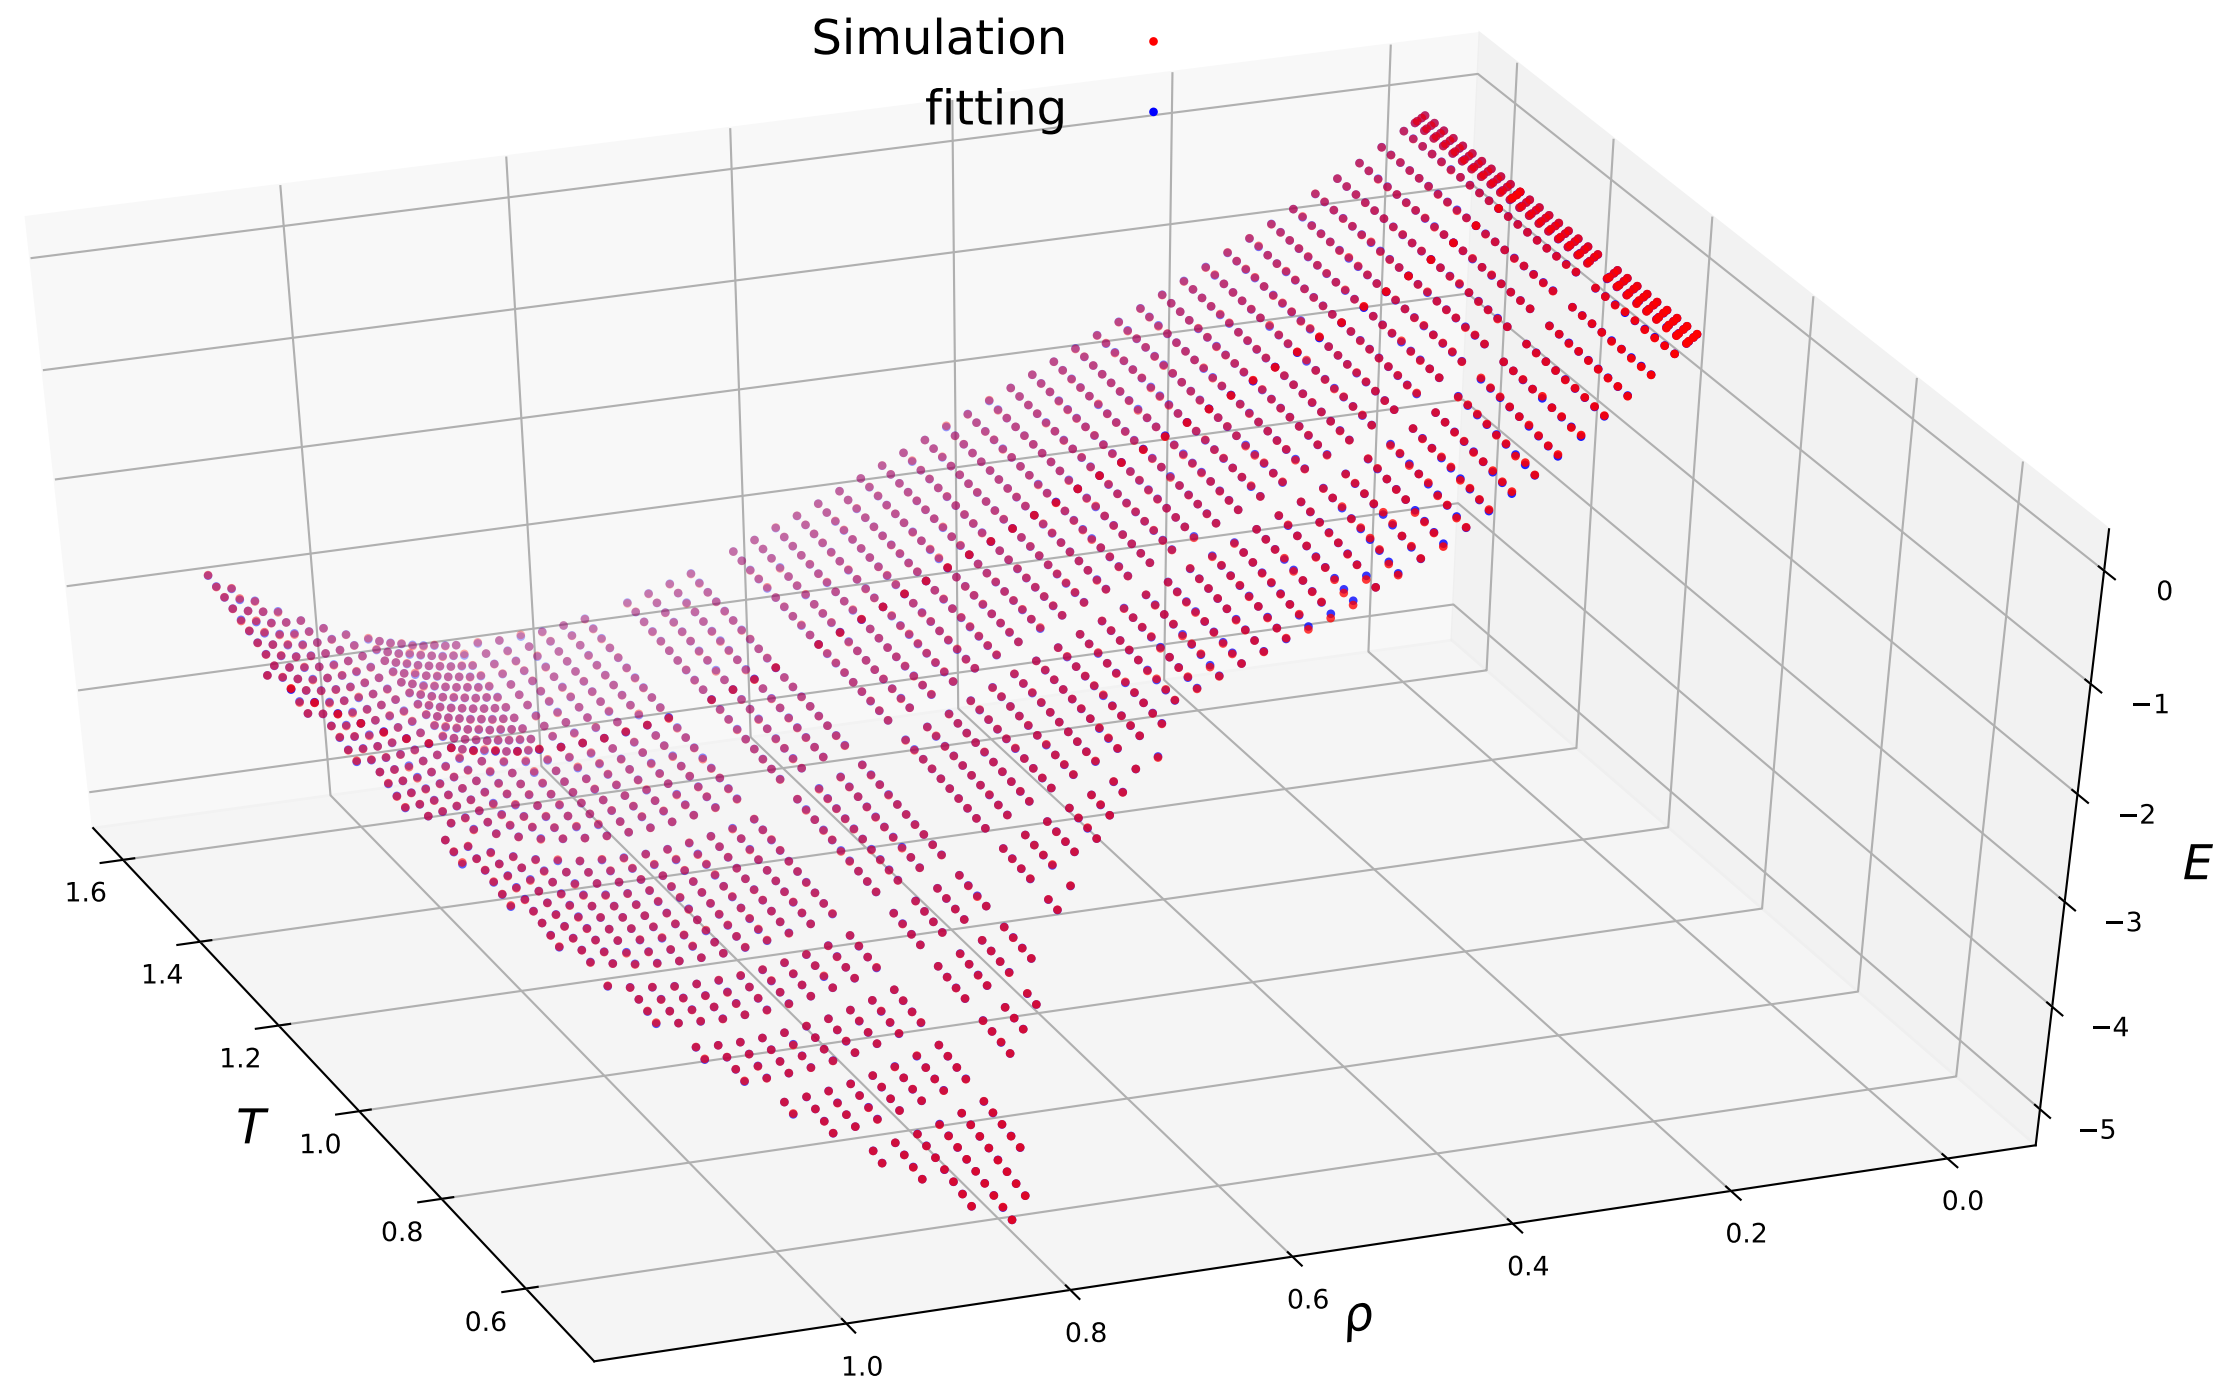

Supplement: c9cp05445f2.zip [file c9cp05445f2.zip]
